# Supplementary material for: Genome of ‘Ca. Desulfovibrio trichonymphae', an H2-oxidizing bacterium in a tripartite symbiotic system within a protist cell in the termite gut
Source: PubMed Central journal article supplement — ISME J. 2016 Nov 1;11(3):766–76. doi: 10.1038/ismej.2016.143 (PMC5322295; doi:10.1038/ismej.2016.143), 2016-11-01
Supplement: ismej2016143x2.pdf [file ismej2016143x2.pdf]

**Supplementary Table S1. Primers designed for RT-PCR.**

| Target      | Primer sequence (5' → 3') | Annealing temperature (°C) |
|-------------|---------------------------|----------------------------|
| <i>cooH</i> | GAATCTGGCCTCAAACCTGCATC   | 63                         |
|             | CACTGGCGTATCAGTTTGAACG    |                            |
| <i>echE</i> | CTTTCAGAAACGTTGCCCTCAC    | 70                         |
|             | CGGGGAATTCCATATCAAACGC    |                            |
| <i>hdrA</i> | ATTCTTGGCCCAAAAATGGTGG    | 68                         |
|             | CACTTGCCTTTGGTAAGCTGAC    |                            |
| <i>nrfA</i> | GCATGGACGAGACCATCAATTG    | 63                         |
|             | AGCGTGTTTGAAGTCGACAAAG    |                            |
| <i>frdA</i> | CGTGCTCAATATGCTTGAAGGG    | 63                         |
|             | GTTCCATGAACTTGGGTTTCGG    |                            |

**Supplementary Table S3. Gene repertoire involved in hydrogen metabolism (Modified from Pereira *et al.*, 2011).**

|                            | <i>Desulfovibrio<br/>aespoeensis</i> | <i>D. alaskensis</i> | <i>D. desulfuricans</i><br>ATCC 27774 | <i>D. magneticus</i> | <i>D. piger</i> | <i>D. salexigens</i> | <i>Desulfovibrio</i> sp.<br>FW1012B | <i>D. vulgaris</i><br>Hildenborough | ' <i>Ca. Desulfovibrio</i><br><i>trichonymphae</i> '<br><b>Rs-N31</b> |
|----------------------------|--------------------------------------|----------------------|---------------------------------------|----------------------|-----------------|----------------------|-------------------------------------|-------------------------------------|-----------------------------------------------------------------------|
| periplasmic<br>[NiFe] Hase | 1                                    | 3                    | 2                                     | 1                    | 2               | 2                    | 1                                   | 3                                   | <b>1</b>                                                              |
| periplasmic<br>[FeFe] Hase | 1                                    | 1                    | 1                                     | 1                    |                 | 1                    | 1                                   | 1                                   |                                                                       |
| Ech-Hase                   | 1                                    |                      | 1                                     | 1                    |                 | 1                    | 1                                   | 1                                   | <b>1</b>                                                              |
| Coo-Hase                   |                                      |                      | 1                                     |                      | 1               |                      |                                     | 1                                   | <b>1</b>                                                              |
| cytoplasmic<br>[FeFe] Hase |                                      | 2                    |                                       | 4                    | 1               | 1                    | 2                                   | 1                                   |                                                                       |
| periplasmic<br>Fdh         | 2                                    | 3                    | 2                                     | 3                    | 1               | 2                    | 2                                   | 3                                   |                                                                       |
| cytoplasmic<br>Hdr complex | 1                                    | 2                    | 1                                     | 1                    | 1               | 1                    | 1                                   | 1                                   | <b>1</b>                                                              |
| lactate<br>dehydrogenase   | 3                                    | 4                    | 3                                     | 4                    | 2               | 3                    | 4                                   | 4                                   |                                                                       |
| cytochrome<br>oxidase      | 1                                    | 2                    | 1                                     | 2                    | 1               | 1                    | 2                                   | 2                                   |                                                                       |
| TpIc <sub>3</sub>          | 2                                    | 2                    | 1                                     | 2                    | 1               | 3                    | 2                                   | 1                                   | <b>1</b>                                                              |
| Dsr                        | 1                                    | 1                    | 1                                     | 1                    | 1               | 1                    | 1                                   | 1                                   | <b>1</b>                                                              |
| Qmo                        | 1                                    | 1                    | 1                                     | 1                    | 1               | 1                    | 1                                   | 1                                   | <b>1</b>                                                              |
| Hmc                        | 1                                    | 1                    |                                       | 1                    |                 | 1                    | 1                                   | 1                                   | <b>1</b>                                                              |
| Qrc                        | 1                                    | 1                    |                                       | 1                    |                 | 1                    | 1                                   | 1                                   |                                                                       |
| Tmc                        | 1                                    | 1                    | 1                                     | 1                    |                 | 1                    | 1                                   | 1                                   |                                                                       |
| Nhc                        | 1                                    |                      | 1                                     |                      | 1               |                      |                                     |                                     |                                                                       |
| Ohc                        |                                      |                      |                                       | 1                    |                 | 1                    |                                     | 1                                   |                                                                       |
| Nrf                        | 1                                    |                      | 1                                     | 1                    | 1               | 1                    | 1                                   | 1                                   | <b>1</b>                                                              |
| Rnf/Nqr/ Nuo               | 2                                    | 1                    | 2                                     | 2                    | 1               | 4                    | 2                                   | 1                                   |                                                                       |
| Frd                        | 1                                    | 1                    | 1                                     | 2                    |                 | 1                    | 1                                   | 1                                   | <b>1</b>                                                              |

**Supplementary Table S4. Amino acids biosynthetic pathways in the genomes.**

|               | <i>'Ca. Desulfovibrio</i><br>trichonymphae' Rs-N31 | <i>'Ca. Endomicrobium</i><br>trichonymphae' Rs-D17 |
|---------------|----------------------------------------------------|----------------------------------------------------|
| Alanine       | +                                                  | +                                                  |
| Arginine      | +                                                  | +                                                  |
| Asparagine    | +                                                  | -                                                  |
| Aspartic acid | +                                                  | +                                                  |
| Cysteine      | +                                                  | -                                                  |
| Glutamine     | +                                                  | -                                                  |
| Glutamic acid | +                                                  | +                                                  |
| Glycine       | +                                                  | +                                                  |
| Histidine     | +                                                  | +                                                  |
| Isoleucine    | +                                                  | +                                                  |
| Leucine       | +                                                  | +                                                  |
| Lysine        | +                                                  | +                                                  |
| Methionine    | -<br>(transporter)                                 | +                                                  |
| Phenylalanine | +                                                  | +                                                  |
| Proline       | +                                                  | -<br>(transporter)                                 |
| Serine        | +                                                  | -<br>(transporter)                                 |
| Threonine     | -<br>(transporter?)                                | +                                                  |
| Tryptophan    | +                                                  | +                                                  |
| Tyrosine      | +                                                  | +                                                  |
| Valine        | +                                                  | +                                                  |

**Supplementary Table S5. Cofactors biosynthetic pathways in the genomes.**

|              | <i>'Ca. Desulfovibrio</i><br><i>trichonymphae'</i> Rs-N31 | <i>'Ca. Endomicrobium</i><br><i>trichonymphae'</i> Rs-D17 |
|--------------|-----------------------------------------------------------|-----------------------------------------------------------|
| FAD          | +                                                         | +                                                         |
| Riboflavin   | +                                                         | +                                                         |
| THF          | +                                                         | +                                                         |
| Thiamin-PP   | +                                                         | +                                                         |
| NAD          | +                                                         | +                                                         |
| NADP         | +                                                         | +                                                         |
| Pantothenate | +                                                         | +                                                         |
| CoA          | +                                                         | +                                                         |
| SAM          | +                                                         | +                                                         |
| heme         | +                                                         | -                                                         |
| Siroheme     | +                                                         | -                                                         |
| Vitamin B12  | +                                                         | -<br>(transporter)                                        |
| Biotin       | -                                                         | +                                                         |
| Lipoate      | -                                                         | +                                                         |
| Menaquinone  | +                                                         | -                                                         |

**Supplementary Table S6. Genes involved in oxygen resistance.**

| <i>Desulfovibrio desulfuricans</i><br>ATCC 27774       | ' <i>Candidatus</i> <i>Desulfovibrio trichonymphae</i> '<br>Rs-N31          |
|--------------------------------------------------------|-----------------------------------------------------------------------------|
| Ddes_0076 Dyp-type peroxidase family protein           | RSDT_pg_138 pseudogene of dye-decolorishing (DyP) peroxidase family protein |
| Ddes_0114 thioredoxin reductase                        | -                                                                           |
| Ddes_0117 thioredoxin domain-containing protein        | -                                                                           |
| Ddes_0538 copper/zinc binding superoxide dismutase     | -                                                                           |
| Ddes_0633 rubrerythrin                                 | -                                                                           |
| Ddes_0897 rubrerythrin                                 | RSDT_0752 rubrerythrin (NADH peroxidase)                                    |
| Ddes_1199 thioredoxin                                  | RSDT_0325 thioredoxin                                                       |
| Ddes_1200 thioredoxin reductase                        | RSDT_0324 NADPH-dependent thioredoxin reductase                             |
| Ddes_1386 rubredoxin-type Fe(Cys) <sub>4</sub> protein | -                                                                           |
| Ddes_1441 redoxin domain-containing protein            | -                                                                           |
| Ddes_1494 catalase                                     | RSDT_pg_146 pseudogene of catalase                                          |
| Ddes_2010 desulfoferrodoxin                            | RSDT_0359 desulfoferrodoxin                                                 |
| Ddes_2011 rubredoxin-type Fe(Cys) <sub>4</sub> protein | RSDT_0360 rubredoxin                                                        |
| Ddes_2012 beta-lactamase domain-containing protein     | RSDT_pg_062 pseudogene of rubredoxin-oxygen oxidoreductase                  |
| Ddes_2195 cytochrome d ubiquinol oxidase, subunit II   | -                                                                           |
| Ddes_2196 cytochrome bd ubiquinol oxidase subunit I    | -                                                                           |
