# Supplementary material for: Genome of ‘Ca. Desulfovibrio trichonymphae', an H2-oxidizing bacterium in a tripartite symbiotic system within a protist cell in the termite gut
Source: PubMed Central journal article supplement — ISME J. 2016 Nov 1;11(3):766–76. doi: 10.1038/ismej.2016.143 (PMC5322295; doi:10.1038/ismej.2016.143), 2016-11-01
Supplement: ismej2016143x3.pdf [file ismej2016143x3.pdf]

**Supplementary Table S2. Genes and pseudogenes of '*Candidatus Desulfovibrio trichonymphae*' phylotype Rs-N31**

| Gene ID      | type       | strand | start | stop  | length (nt) | length (aa) | gene name                                                                      | abbrev. | EC number             |
|--------------|------------|--------|-------|-------|-------------|-------------|--------------------------------------------------------------------------------|---------|-----------------------|
| RSDT_0001    | CDS        | +      | 1     | 1413  | 1413        | 470         | chromosomal replication initiator protein DnaA                                 | dnaA1   |                       |
| RSDT_0002    | CDS        | -      | 2202  | 1423  | 780         | 259         | prephenate dehydrogenase                                                       | tyrA    | 1.3.1.12              |
| RSDT_0003    | CDS        | -      | 3590  | 2199  | 1392        | 463         | 3-phosphoshikimate 1-carboxyvinyltransferase                                   | aroA    | 2.5.1.19              |
| RSDT_0004    | CDS        | -      | 4807  | 3587  | 1221        | 406         | chorismate mutase                                                              | pheA    | 5.4.99.5/<br>4.2.1.51 |
| RSDT_0005    | CDS        | -      | 5795  | 4812  | 984         | 327         | 3-dehydroquinate synthase II                                                   | aroB    | 1.4.1.24              |
| RSDT_0006    | CDS        | -      | 6594  | 5797  | 798         | 265         | phospho-2-dehydro-3-deoxyheptonate aldolase                                    | fbaB    | 2.5.1.54              |
| RSDT_pg_001  | pseudogene | -      | 7060  | 6883  | 178 x       |             | pseudogene of transposase                                                      |         |                       |
| RSDT_0007    | CDS        | -      | 8748  | 7279  | 1470        | 489         | signal recognition particle protein                                            | ffh     |                       |
| RSDT_0008    | CDS        | -      | 9621  | 8974  | 648         | 215         | molybdenum cofactor cytidyltransferase                                         | ygfJ    | 2.7.7.76              |
| RSDT_0009    | CDS        | -      | 10376 | 9588  | 789         | 262         | YqeC-like putative molybdenum hydroxylase maturation protein                   | yqeC    |                       |
| RSDT_tRNA_01 | tRNA       | -      | 11099 | 11024 | 76 xx       |             | tRNA-Met                                                                       |         |                       |
| RSDT_0010    | CDS        | +      | 11795 | 11986 | 192         | 63          | conserved hypothetical protein                                                 |         |                       |
| RSDT_0011    | CDS        | +      | 11997 | 13547 | 1551        | 516         | cobyrinic acid a,c-diamide synthase                                            | cbiA2   | 6.3.5.11              |
| RSDT_0012    | CDS        | +      | 13556 | 14209 | 654         | 217         | cobalt-precorrin-8X methylmutase                                               | cbiC    | 5.4.1.2               |
| RSDT_pg_002  | pseudogene | +      | 14417 | 15087 | 671 x       |             | pseudogene of conserved hypothetical protein                                   |         |                       |
| RSDT_pg_003  | pseudogene | +      | 15270 | 15835 | 566 x       |             | pseudogene of transposase                                                      |         |                       |
| RSDT_0013    | CDS        | -      | 16983 | 16228 | 756         | 251         | type II DNA restriction-modification system methyltransferase subunit          |         |                       |
| RSDT_pg_004  | pseudogene | -      | 17824 | 16980 | 845 x       |             | pseudogene of type II DNA restriction-modification system endonuclease subunit |         | 3.1.21.4              |
| RSDT_pg_005  | pseudogene | -      | 19674 | 18906 | 769 x       |             | pseudogene of DNA adenine methyltransferase                                    | dam     | 2.1.1.72              |
| RSDT_tRNA_02 | tRNA       | -      | 20018 | 19943 | 76 xx       |             | tRNA-Ala                                                                       |         |                       |
| RSDT_0014    | CDS        | -      | 21373 | 20246 | 1128        | 375         | 2-iminoacetate synthase                                                        | thiH    | 4.1.99.19             |
| RSDT_tRNA_03 | tRNA       | +      | 21786 | 21871 | 86 xx       |             | tRNA-Leu                                                                       |         |                       |
| RSDT_pg_006  | pseudogene | +      | 22034 | 22376 | 343 x       |             | pseudogene of phage integrase                                                  |         |                       |

|             |            |   |       |       |        |                                                                                    |  |                |
|-------------|------------|---|-------|-------|--------|------------------------------------------------------------------------------------|--|----------------|
| RSDT_pg_007 | pseudogene | + | 22440 | 22652 | 213 x  | pseudogene of uncharacterized transcriptional regulator                            |  |                |
| RSDT_0015   | CDS        | - | 23627 | 23385 | 243    | 80 conserved hypothetical protein                                                  |  |                |
| RSDT_0016   | CDS        | - | 23934 | 23770 | 165    | 54 conserved hypothetical protein                                                  |  |                |
| RSDT_0017   | CDS        | - | 25398 | 23962 | 1437   | 478 conserved hypothetical protein                                                 |  |                |
| RSDT_0018   | CDS        | - | 27166 | 25604 | 1563   | 520 conserved hypothetical protein                                                 |  |                |
| RSDT_0019   | CDS        | - | 27718 | 27443 | 276    | 91 DNA-binding protein HU-beta                                                     |  | hupB           |
| RSDT_0020   | CDS        | - | 28927 | 28085 | 843    | 280 glutamate racemase                                                             |  | murI 5.1.1.3   |
| RSDT_0021   | CDS        | - | 30004 | 29063 | 942    | 313 sulfite exporter TauE/SafE family protein                                      |  |                |
| RSDT_0022   | CDS        | + | 30217 | 30855 | 639    | 212 imidazole glycerol phosphate synthase subunit hisH                             |  | hisH 2.4.2.-   |
| RSDT_0023   | CDS        | + | 30845 | 31624 | 780    | 259 imidazole glycerol phosphate synthase subunit hisF                             |  | hisF 4.1.3.-   |
| RSDT_0024   | CDS        | + | 31795 | 31908 | 114    | 37 conserved hypothetical protein                                                  |  |                |
| RSDT_0025   | CDS        | + | 32172 | 32609 | 438    | 145 FmdB family regulatory protein                                                 |  |                |
| RSDT_0026   | CDS        | + | 32606 | 33928 | 1323   | 440 adenylosuccinate lyase                                                         |  | purB 4.3.2.2   |
| RSDT_0027   | CDS        | + | 33921 | 34481 | 561    | 186 orotate phosphoribosyltransferase                                              |  | pyrE 2.4.2.10  |
| RSDT_pg_008 | pseudogene | + | 34617 | 36319 | 1703 x | pseudogene of pyridine nucleotide-disulfide oxidoreductase/CoA disulfide reductase |  |                |
| RSDT_0028   | CDS        | + | 36587 | 37201 | 615    | 204 ribosome maturation factor RimP                                                |  | rimP           |
| RSDT_0029   | CDS        | + | 37294 | 38637 | 1344   | 447 transcription elongation factor NusA                                           |  | nusA           |
| RSDT_0030   | CDS        | + | 38874 | 41834 | 2961   | 986 translation initiation factor IF-2                                             |  | infB           |
| RSDT_pg_009 | pseudogene | + | 41958 | 42187 | 230 x  | pseudogene of conserved hypothetical protein                                       |  |                |
| RSDT_0031   | CDS        | + | 42222 | 43262 | 1041   | 346 DHH family phosphoesterase                                                     |  |                |
| RSDT_pg_010 | pseudogene | - | 45210 | 43264 | 1947 x | pseudogene of translation elongation factor G                                      |  | fusA1          |
| RSDT_0032   | CDS        | + | 45711 | 46382 | 672    | 223 outermembrane Hek-like protein                                                 |  |                |
| RSDT_0033   | CDS        | + | 46493 | 47434 | 942    | 313 tRNA pseudouridine synthase B                                                  |  | truB 5.4.99.25 |
| RSDT_0034   | CDS        | + | 47460 | 47729 | 270    | 89 ribosomal protein S15                                                           |  | rpsO           |
| RSDT_0035   | CDS        | + | 47896 | 50130 | 2235   | 744 polyribonucleotide nucleotidyltransferase                                      |  | pnp 2.7.7.8    |
| RSDT_0036   | CDS        | + | 50223 | 51176 | 954    | 317 conserved hypothetical protein                                                 |  |                |
| RSDT_0037   | CDS        | - | 52253 | 51186 | 1068   | 355 peptide chain release factor 1 (RF-1)                                          |  | prfA           |

|             |            |   |       |       |        |                                                 |      |          |
|-------------|------------|---|-------|-------|--------|-------------------------------------------------|------|----------|
| RSDT_0038   | CDS        | - | 53191 | 52274 | 918    | 305 conserved hypothetical protein              |      |          |
| RSDT_0039   | CDS        | - | 53507 | 53295 | 213    | 70 50S ribosomal protein L31                    | rpmE |          |
| RSDT_0040   | CDS        | - | 54718 | 53666 | 1053   | 350 conserved hypothetical protein              |      |          |
| RSDT_0041   | CDS        | - | 56405 | 54987 | 1419   | 472 phosphomannomutase                          | manB | 5.4.2.8  |
| RSDT_0042   | CDS        | - | 57103 | 56678 | 426    | 141 Ros/MucR family transcriptional regulator   |      |          |
| RSDT_pg_011 | pseudogene | + | 57371 | 58422 | 1052 x | pseudogene of outer membrane autotransporter    |      |          |
| RSDT_0043   | CDS        | - | 59439 | 58693 | 747    | 248 6-phosphogluconolactonase                   | pgl  | 3.1.1.31 |
| RSDT_0044   | CDS        | - | 60015 | 59662 | 354    | 117 fumarate reductase subunit D                | frdD | 1.3.1.6  |
| RSDT_0045   | CDS        | - | 60386 | 60027 | 360    | 119 fumarate reductase subunit C                | frdC | 1.3.1.6  |
| RSDT_0046   | CDS        | - | 61137 | 60376 | 762    | 253 fumarate reductase subunit B                | frdB | 1.3.1.6  |
| RSDT_0047   | CDS        | - | 62926 | 61130 | 1797   | 598 fumarate reductase flavoprotein subunit A   | frdA | 1.3.1.6  |
| RSDT_0048   | CDS        | - | 64273 | 62960 | 1314   | 437 conserved hypothetical protein              |      |          |
| RSDT_0049   | CDS        | - | 65779 | 64334 | 1446   | 481 putative sodium:sulfate symporter           |      |          |
| RSDT_0050   | CDS        | - | 66370 | 65813 | 558    | 185 fumarate hydratase, beta subunit            | fumB | 4.2.1.2  |
| RSDT_0051   | CDS        | - | 67226 | 66381 | 846    | 281 fumarate hydratase, alpha subunit           | fumA | 4.2.1.2  |
| RSDT_0052   | CDS        | - | 70529 | 67380 | 3150   | 1049 cation efflux system protein CusA          | cusA |          |
| RSDT_0053   | CDS        | - | 71815 | 70562 | 1254   | 417 cation efflux system protein CusB           | cusB |          |
| RSDT_0054   | CDS        | - | 72265 | 71894 | 372    | 123 cation efflux system protein CusF           | cusF |          |
| RSDT_0055   | CDS        | - | 73715 | 72303 | 1413   | 470 cation efflux system protein CusC           | cusC |          |
| RSDT_0056   | CDS        | - | 74222 | 73845 | 378    | 125 hypothetical protein                        |      |          |
| RSDT_0057   | CDS        | + | 74797 | 77532 | 2736   | 911 DNA polymerase I                            | polA | 2.7.7.7  |
| RSDT_0058   | CDS        | - | 79202 | 77790 | 1413   | 470 recombination protein RmuC                  | rmuC |          |
| RSDT_0059   | CDS        | - | 79885 | 79286 | 600    | 199 MarC family integral membrane protein       |      |          |
| RSDT_0060   | CDS        | + | 80154 | 80888 | 735    | 244 cell division protein Fic                   | fic  |          |
| RSDT_0061   | CDS        | - | 81443 | 81078 | 366    | 121 RNA polymerase-binding protein DksA         | dksA |          |
| RSDT_0062   | CDS        | - | 82485 | 81613 | 873    | 290 UTP-glucose-1-phosphate uridylyltransferase | galU | 2.7.7.9  |
| RSDT_0063   | CDS        | - | 83873 | 82920 | 954    | 317 conservative hypothetical protein           |      |          |

|              |            |   |        |        |      |     |                                                               |       |           |
|--------------|------------|---|--------|--------|------|-----|---------------------------------------------------------------|-------|-----------|
| RSDT_0064    | CDS        | + | 84071  | 84880  | 810  | 269 | 5,10-methylenetetrahydrofolate reductase                      | metF  | 1.5.1.20  |
| RSDT_tRNA_04 | tRNA       | - | 85215  | 85140  | 76   | xx  | tRNA-Thr                                                      |       |           |
| RSDT_0065    | CDS        | - | 86496  | 85456  | 1041 | 346 | Yceg-like uncharacterized protein                             |       |           |
| RSDT_0066    | CDS        | - | 86930  | 86493  | 438  | 145 | putative Holliday junction resolvase YqgF                     | yqgF  | 3.1.22.4  |
| RSDT_0067    | CDS        | - | 87922  | 86936  | 987  | 328 | tryptophanyl-tRNA synthetase                                  | trpS  | 6.1.1.2   |
| RSDT_0068    | CDS        | - | 88691  | 88020  | 672  | 223 | Zn-dependent M50 family peptidase                             |       |           |
| RSDT_0069    | CDS        | + | 88805  | 90424  | 1620 | 539 | alpha-isopropylmalate/homocitrate synthase family transferase |       |           |
| RSDT_0070    | CDS        | + | 90693  | 91151  | 459  | 152 | putative membrane protease regulator                          |       |           |
| RSDT_0071    | CDS        | + | 91153  | 92109  | 957  | 318 | membrane-bound protease                                       |       |           |
| RSDT_pg_012  | pseudogene | - | 92666  | 92238  | 429  | x   | pseudogene of thioesterase family protein                     |       |           |
| RSDT_0072    | CDS        | + | 92661  | 93833  | 1173 | 390 | membrane-bound lytic murein transglycosylase A                |       |           |
| RSDT_0073    | CDS        | - | 94412  | 94023  | 390  | 129 | cytochrome c class III                                        | cytC3 |           |
| RSDT_0074    | CDS        | - | 95279  | 94527  | 753  | 250 | precorrin-3B C17-methyltransferase                            | cbiH  | 2.1.1.131 |
| RSDT_0075    | CDS        | - | 96424  | 95276  | 1149 | 382 | cobalamin biosynthesis protein CbiG                           | cbiG  | 3.7.1.12  |
| RSDT_0076    | CDS        | - | 97698  | 96424  | 1275 | 424 | glutamate-1-semialdehyde aminotransferase                     | hemL  | 5.4.3.8   |
| RSDT_0077    | CDS        | + | 98359  | 99420  | 1062 | 353 | N-acetylneuraminate synthase                                  | neuB  | 2.5.1.56  |
| RSDT_0078    | CDS        | + | 99428  | 101137 | 1710 | 569 | conserved hypothetical protein                                |       |           |
| RSDT_0079    | CDS        | + | 101134 | 102183 | 1050 | 349 | conserved hypothetical protein                                |       |           |
| RSDT_0080    | CDS        | + | 102303 | 102797 | 495  | 164 | molybdenum cofactor biosynthesis protein MoaC                 | moaC  |           |
| RSDT_0081    | CDS        | + | 102794 | 103570 | 777  | 258 | prolipoprotein diacylglyceryl transferase                     | lgt   |           |
| RSDT_0082    | CDS        | - | 106351 | 103604 | 2748 | 915 | outer membrane protein assembly complex, YaeT protein         | yaeT  |           |
| RSDT_0083    | CDS        | - | 107063 | 106377 | 687  | 228 | lipoprotein releasing system ATP-binding protein              | lolD  |           |
| RSDT_0084    | CDS        | - | 108292 | 107066 | 1227 | 408 | lipoprotein releasing system transmembrane protein            | lolC  |           |
| RSDT_0085    | CDS        | - | 110015 | 108432 | 1584 | 527 | lysyl-tRNA synthetase                                         | lysS  | 6.1.1.6   |
| RSDT_0086    | CDS        | + | 110411 | 111292 | 882  | 293 | pyridoxal biosynthesis lyase pdxS                             | pdxS  | 4.3.3.6   |
| RSDT_0087    | CDS        | + | 111431 | 112069 | 639  | 212 | SNO glutamine amidotransferase                                | pdxT  | 4.3.3.6   |
| RSDT_pg_013  | pseudogene | + | 112054 | 112582 | 529  | x   | pseudogene of NUDIX hydrolase                                 |       |           |

|                     |             |          |               |               |           |           |                                                                                    |               |                        |
|---------------------|-------------|----------|---------------|---------------|-----------|-----------|------------------------------------------------------------------------------------|---------------|------------------------|
| RSDT_0088           | CDS         | +        | 112600        | 114438        | 1839      | 612       | 3-octaprenyl-4-hydroxybenzoate carboxy-lyase                                       | ubiD          | 4.1.1.-                |
| RSDT_0089           | CDS         | -        | 115078        | 114653        | 426       | 141       | putative mannose-1-phosphate guanylyltransferase /mannose-6-phosphate isomerase    |               | 2.7.7.229/<br>5.3.1.8  |
| RSDT_pg_014         | pseudogene  | -        | 116163        | 115356        | 808       | x         | pseudogene of outer membrane autotransporter                                       |               |                        |
| RSDT_pg_015         | pseudogene  | +        | 116979        | 117439        | 461       | x         | pseudogene of dTDP-4-dehydrorhamnose reductase                                     | rfbD          | 1.1.1.133              |
| RSDT_0090           | CDS         | +        | 117626        | 119470        | 1845      | 614       | citrate (Re)-synthase                                                              |               | 2.3.3.3                |
| RSDT_0091           | CDS         | +        | 119493        | 120632        | 1140      | 379       | NADP-dependent isocitrate dehydrogenase                                            | icd           | 1.1.1.41               |
| RSDT_0092           | CDS         | +        | 120654        | 122969        | 2316      | 771       | aconitate hydratase A                                                              | acnA          | 4.2.1.3                |
| RSDT_pg_016         | pseudogene  | +        | 122990        | 124171        | 1182      | x         | pseudogene of major facilitator superfamily protein                                |               |                        |
| RSDT_0093           | CDS         | +        | 124216        | 124830        | 615       | 204       | NADPH:FMN oxidoreductases                                                          |               |                        |
| RSDT_0094           | CDS         | +        | 124964        | 126079        | 1116      | 371       | YaeI-like metallophosphoesterase                                                   |               |                        |
| RSDT_0095           | CDS         | -        | 127531        | 126083        | 1449      | 482       | glycine dehydrogenase subunit 2                                                    | gcvPB         | 1.4.4.2                |
| RSDT_0096           | CDS         | -        | 128859        | 127528        | 1332      | 443       | glycine dehydrogenase subunit 1                                                    | gcvPA         | 1.4.4.2                |
| RSDT_0097           | CDS         | -        | 129259        | 128873        | 387       | 128       | glycine cleavage system H protein                                                  | gcvH          |                        |
| RSDT_0098           | CDS         | -        | 130372        | 129290        | 1083      | 360       | glycine cleavage system T protein                                                  | gcvT          | 2.1.2.10               |
| RSDT_0099           | CDS         | -        | 131390        | 130395        | 996       | 331       | lipoyltransferase and lipoate-protein ligase                                       | lplA          | 2.7.7.63               |
| RSDT_0100           | CDS         | -        | 132270        | 131446        | 825       | 274       | Mg-dependent DNase                                                                 | tatD          |                        |
| RSDT_0101           | CDS         | +        | 132438        | 133391        | 954       | 317       | uncharacterized UDP-glucose epimerase                                              | yticB         |                        |
| <b>RSDT_tRNA_05</b> | <b>tRNA</b> | <b>-</b> | <b>133653</b> | <b>133576</b> | <b>78</b> | <b>xx</b> | <b>tRNA-Pro</b>                                                                    |               |                        |
| RSDT_pg_017         | pseudogene  | -        | 135648        | 133845        | 1804      | x         | pseudogene of type I DNA restriction-modification system endonuclease subunit      | hsdR          |                        |
| RSDT_pg_018         | pseudogene  | -        | 136239        | 135655        | 585       | x         | pseudogene of type I DNA restriction-modification system methyltransferase subunit | hsdM          |                        |
| RSDT_0102           | CDS         | -        | 138180        | 136489        | 1692      | 563       | dihydroxy-acid dehydratase                                                         | ilvD          | 4.2.1.9                |
| RSDT_0103           | CDS         | -        | 139923        | 138217        | 1707      | 568       | glutaminyI-tRNA synthetase                                                         | glnS          | 6.1.1.18               |
| <b>RSDT_tRNA_06</b> | <b>tRNA</b> | <b>+</b> | <b>140139</b> | <b>140233</b> | <b>95</b> | <b>xx</b> | <b>tRNA-Ser</b>                                                                    |               |                        |
| RSDT_0104           | CDS         | -        | 142363        | 140789        | 1575      | 524       | 23S rRNA pseudouridine synthase D/dephospho-CoA kinase                             | rluD/<br>coaE | 5.4.99.B4/<br>2.7.1.24 |
| RSDT_0105           | CDS         | -        | 143799        | 142360        | 1440      | 479       | putative cell wall-associated hydrolases                                           |               |                        |
| RSDT_pg_019         | pseudogene  | -        | 144259        | 143919        | 341       | x         | pseudogene of transposase                                                          |               |                        |

|              |            |   |        |        |      |     |                                                         |       |           |
|--------------|------------|---|--------|--------|------|-----|---------------------------------------------------------|-------|-----------|
| RSDT_0106    | CDS        | + | 144373 | 144657 | 285  | 94  | (2R)-sulfolactate sulfo-lyase subunit alpha             | suyA  | 4.4.1.24  |
| RSDT_0107    | CDS        | + | 144661 | 145821 | 1161 | 386 | (2R)-sulfolactate sulfo-lyase subunit beta              | suyB  | 4.4.1.24  |
| RSDT_0108    | CDS        | + | 146624 | 147571 | 948  | 315 | tricarboxylate transporter receptor subunit             | tctC  |           |
| RSDT_0109    | CDS        | + | 147671 | 149659 | 1989 | 662 | tricarboxylate transporter permease subunit             | tctAB |           |
| RSDT_pg_020  | pseudogene | + | 149699 | 150613 | 915  | x   | pseudogene of (2R)-3-sulfolactate dehydrogenase (NADP+) | comC  | 1.1.1.338 |
| RSDT_pg_021  | pseudogene | - | 151539 | 150611 | 929  | x   | pseudogene of putative drug efflux pump                 |       |           |
| RSDT_0110    | CDS        | - | 152474 | 151890 | 585  | 194 | conserved membrane protein                              |       |           |
| RSDT_0111    | CDS        | - | 153477 | 152515 | 963  | 320 | ABC transporter substrate-binding protein               |       |           |
| RSDT_0112    | CDS        | - | 154238 | 153474 | 765  | 254 | ABC transporter ATP-binding protein                     |       |           |
| RSDT_0113    | CDS        | - | 155395 | 154241 | 1155 | 384 | ABC transporter permease                                |       |           |
| RSDT_tRNA_07 | tRNA       | - | 155888 | 155813 | 76   | xx  | tRNA-Glu                                                |       |           |
| RSDT_0114    | CDS        | - | 156206 | 155952 | 255  | 84  | conserved hypothetical protein                          |       |           |
| RSDT_0115    | CDS        | - | 159049 | 156386 | 2664 | 887 | putative Fe-S oxidoreductase                            |       |           |
| RSDT_0116    | CDS        | - | 159460 | 159122 | 339  | 112 | conserved hypothetical protein                          |       |           |
| RSDT_0117    | CDS        | + | 159586 | 160371 | 786  | 261 | ribonuclease III                                        | rnc   | 3.1.26.3  |
| RSDT_pg_022  | pseudogene | - | 160657 | 160442 | 216  | x   | pseudogene of flagellin                                 | fliC  |           |
| RSDT_0118    | CDS        | - | 163114 | 160682 | 2433 | 810 | ATP-dependent Lon protease                              | lonP  | 3.4.21.53 |
| RSDT_0119    | CDS        | - | 164502 | 163225 | 1278 | 425 | ATP-dependent Clp protease ATP-binding subunit          | clpX  |           |
| RSDT_0120    | CDS        | - | 165118 | 164507 | 612  | 203 | ATP-dependent Clp protease proteolytic subunit          | clpP  | 3.4.21.92 |
| RSDT_0121    | CDS        | - | 166527 | 165178 | 1350 | 449 | trigger factor                                          | tig   | 5.2.1.8   |
| RSDT_0122    | CDS        | + | 167271 | 168191 | 921  | 306 | branched-chain amino acid aminotransferase              | ilvE  | 2.6.1.42  |
| RSDT_0123    | CDS        | + | 168198 | 169886 | 1689 | 562 | DNA polymerase III, subunits gamma and tau              | dnaX  | 2.7.7.7   |
| RSDT_0124    | CDS        | + | 169930 | 170241 | 312  | 103 | YbaB/EbfC family DNA-binding protein                    |       |           |
| RSDT_0125    | CDS        | + | 170243 | 170851 | 609  | 202 | DNA repair/recombination protein RecR                   | recR  |           |
| RSDT_0126    | CDS        | - | 171463 | 170990 | 474  | 157 | putative cell wall-associated hydrolase                 |       |           |
| RSDT_pg_023  | pseudogene | + | 171190 | 171582 | 393  | x   | pseudogene of transposase                               |       |           |
| RSDT_0127    | CDS        | + | 172439 | 173650 | 1212 | 403 | tyrosyl-tRNA synthetase                                 | tyrS  | 6.1.1.1   |

|             |            |   |        |        |       |                                                                                 |      |            |
|-------------|------------|---|--------|--------|-------|---------------------------------------------------------------------------------|------|------------|
| RSDT_0128   | CDS        | + | 173762 | 174859 | 1098  | 365 4Fe-4S ferredoxin                                                           |      |            |
| RSDT_0129   | CDS        | + | 174951 | 175847 | 897   | 298 conserved hypothetical protein                                              |      |            |
| RSDT_0130   | CDS        | - | 176809 | 175844 | 966   | 321 oligopeptide/dipeptide ABC transporter ATP-binding protein                  | dppF |            |
| RSDT_0131   | CDS        | - | 177880 | 176813 | 1068  | 355 nicotinate-nucleotide--dimethylbenzimidazole phosphoribosyltransferase      | cobT | 2.4.2.21   |
| RSDT_0132   | CDS        | + | 178026 | 179363 | 1338  | 445 periplasmic serine protease                                                 |      |            |
| RSDT_0133   | CDS        | + | 179488 | 179676 | 189   | 62 4Fe-4S ferredoxin                                                            |      |            |
| RSDT_0134   | CDS        | + | 179748 | 180416 | 669   | 222 conserved hypothetical protein                                              |      |            |
| RSDT_0135   | CDS        | + | 180430 | 180822 | 393   | 130 conserved hypothetical protein                                              |      |            |
| RSDT_0136   | CDS        | + | 180819 | 181445 | 627   | 208 conserved hypothetical protein                                              |      |            |
| RSDT_0137   | CDS        | + | 181951 | 183525 | 1575  | 524 type II DNA DNA restriction-modification system methyltransferase subunit   |      |            |
| RSDT_pg_024 | pseudogene | + | 183535 | 184221 | 687 x | pseudogene of type II DNA restriction-modification system endonuclease subunit  |      |            |
| RSDT_0138   | CDS        | - | 185344 | 184292 | 1053  | 350 ribosomal RNA large subunit methyltransferase N                             | rlmN | 2.1.1.192  |
| RSDT_0139   | CDS        | - | 186429 | 185401 | 1029  | 342 DHH family phosphoesterase                                                  |      |            |
| RSDT_0140   | CDS        | - | 189709 | 186803 | 2907  | 968 Zn-dependent M16 family peptidase                                           |      |            |
| RSDT_0141   | CDS        | - | 190876 | 189713 | 1164  | 387 nitronate monooxygenase                                                     | npd  | 1.13.12.16 |
| RSDT_pg_025 | pseudogene | - | 191552 | 191090 | 463 x | pseudogene of conserved hypothetical protein                                    |      |            |
| RSDT_0142   | CDS        | - | 192594 | 191788 | 807   | 268 conserved hypothetical protein                                              |      |            |
| RSDT_0143   | CDS        | - | 193628 | 192600 | 1029  | 342 conserved hypothetical protein                                              |      |            |
| RSDT_pg_026 | pseudogene | - | 194119 | 193720 | 400 x | pseudogene of conserved hypothetical protein                                    |      |            |
| RSDT_0144   | CDS        | - | 194989 | 194126 | 864   | 287 4-hydroxybenzoate polyprenyltransferase                                     | ubiA | 2.5.1.39   |
| RSDT_0145   | CDS        | - | 195804 | 195013 | 792   | 263 MogA/MoaB family molybdenum cofactor biosynthesis protein                   | moaB |            |
| RSDT_0146   | CDS        | + | 195969 | 196487 | 519   | 172 preQ1 synthase                                                              | queF | 1.7.1.13   |
| RSDT_0147   | CDS        | + | 196658 | 197980 | 1323  | 440 signal recognition particle-docking protein FtsY                            | ftsY |            |
| RSDT_pg_027 | pseudogene | - | 198140 | 197997 | 144 x | pseudogene of type III DNA restriction-modification system endonuclease subunit |      |            |
| RSDT_0148   | CDS        | + | 199519 | 199794 | 276   | 91 conserved hypothetical protein                                               |      |            |
| RSDT_0149   | CDS        | + | 200109 | 200966 | 858   | 285 Zn-dependent membrane-bound peptidase HtpX                                  | htpX | 3.4.24.-   |

|              |            |   |        |        |      |     |                                                      |       |           |
|--------------|------------|---|--------|--------|------|-----|------------------------------------------------------|-------|-----------|
| RSDT_0150    | CDS        | + | 201005 | 201397 | 393  | 130 | conserved hypothetical protein                       |       |           |
| RSDT_0151    | CDS        | + | 201411 | 202403 | 993  | 330 | UDP-glucose 4-epimerase                              | galE  | 5.1.3.2   |
| RSDT_tRNA_08 | tRNA       | + | 202460 | 202536 | 77   | xx  | tRNA-Met                                             |       |           |
| RSDT_pg_028  | pseudogene | + | 202681 | 202978 | 298  | x   | pseudogene of conserved hypothetical protein         |       |           |
| RSDT_0152    | CDS        | + | 204335 | 205786 | 1452 | 483 | outer membrane efflux protein TolC                   | tolC1 |           |
| RSDT_0153    | CDS        | + | 205783 | 207447 | 1665 | 554 | ribonuclease J                                       | rnj   | 3.1.27.2  |
| RSDT_tRNA_09 | tRNA       | - | 207801 | 207725 | 77   | xx  | tRNA-Pro                                             |       |           |
| RSDT_0154    | CDS        | + | 208020 | 208598 | 579  | 192 | conserved hypothetical protein                       |       |           |
| RSDT_0155    | CDS        | - | 209790 | 208738 | 1053 | 350 | quinolinate synthetase                               | nadA  | 2.5.1.72  |
| RSDT_0156    | CDS        | + | 209904 | 210452 | 549  | 182 | conserved hypothetical protein                       |       |           |
| RSDT_0157    | CDS        | - | 211604 | 210594 | 1011 | 336 | cobalamin biosynthesis protein CbiB                  | cbiB  | 6.3.1.10  |
| RSDT_0158    | CDS        | - | 212094 | 211633 | 462  | 153 | tRNA (cytidine34-2'-O)-methyltransferase             | trmL  | 2.1.1.207 |
| RSDT_0159    | CDS        | - | 213876 | 212143 | 1734 | 577 | putative dihydropyrimidinase                         |       | 3.5.2.2   |
| RSDT_0160    | CDS        | - | 214728 | 214003 | 726  | 241 | cytidylate kinase                                    | cmk   | 2.7.4.14  |
| RSDT_0161    | CDS        | - | 215870 | 214725 | 1146 | 381 | histidinol-phosphate aminotransferase                | hisC  | 2.6.1.9   |
| RSDT_0162    | CDS        | - | 216418 | 215966 | 453  | 150 | universal stress protein                             | usp   |           |
| RSDT_0163    | CDS        | - | 219244 | 216536 | 2709 | 902 | valyl-tRNA synthetase                                | valS  | 6.1.1.9   |
| RSDT_0164    | CDS        | + | 219368 | 220663 | 1296 | 431 | conserved hypothetical protein                       |       |           |
| RSDT_pg_029  | pseudogene | + | 220819 | 222107 | 1289 | x   | pseudogene of adenine-specific DNA methyltransferase |       |           |
| RSDT_pg_030  | pseudogene | + | 222146 | 222523 | 378  | x   | pseudogene of nucleotide-binding protein             |       |           |
| RSDT_0165    | CDS        | + | 222572 | 223108 | 537  | 178 | shikimate kinase 2                                   | aroL  | 2.7.1.71  |
| RSDT_0166    | CDS        | + | 223349 | 223768 | 420  | 139 | FoF1 ATP synthase subunit B'                         | atpF1 | 3.6.3.14  |
| RSDT_0167    | CDS        | + | 223832 | 224410 | 579  | 192 | FoF1 ATP synthase subunit B                          | atpF2 | 3.6.3.14  |
| RSDT_0168    | CDS        | + | 224407 | 224958 | 552  | 183 | FoF1 ATP synthase subunit delta                      | atpH  | 3.6.3.14  |
| RSDT_0169    | CDS        | + | 224962 | 226470 | 1509 | 502 | FoF1 ATP synthase subunit alpha                      | atpA  | 3.6.3.14  |
| RSDT_0170    | CDS        | + | 226495 | 227379 | 885  | 294 | FoF1 ATP synthase subunit gamma                      | atpG  | 3.6.3.14  |
| RSDT_0171    | CDS        | + | 227390 | 228811 | 1422 | 473 | FoF1 ATP synthase subunit beta                       | atpD  | 3.6.3.14  |



|              |            |   |        |        |       |      |                                                   |      |          |
|--------------|------------|---|--------|--------|-------|------|---------------------------------------------------|------|----------|
| RSDT_0172    | CDS        | + | 228844 | 229245 | 402   | 133  | Fo1 ATP synthase subunit epsilon                  | atpC | 3.6.3.14 |
| RSDT_0173    | CDS        | - | 230219 | 229482 | 738   | 245  | 3'-5' exonuclease                                 |      |          |
| RSDT_0174    | CDS        | - | 231623 | 230226 | 1398  | 465  | tRNA modification GTPase TrmE                     | trmE |          |
| RSDT_0175    | CDS        | - | 232594 | 231629 | 966   | 321  | single-stranded DNA-binding protein               |      |          |
| RSDT_0176    | CDS        | - | 234284 | 232632 | 1653  | 550  | membrane protein insertase subunit YidC           | yidC |          |
| RSDT_0177    | CDS        | - | 234556 | 234293 | 264   | 87   | membrane protein insertion efficiency factor YidD | yidD |          |
| RSDT_0178    | CDS        | - | 234954 | 234553 | 402   | 133  | ribonuclease P protein component                  | rnpA | 3.1.26.5 |
| RSDT_0179    | CDS        | - | 235103 | 234969 | 135   | 44   | 50S ribosomal protein L34                         | rpmH |          |
| RSDT_pg_031  | pseudogene | + | 235112 | 235507 | 396 x |      | pseudogene of urease accessory protein UreG       | ureG |          |
| RSDT_pg_032  | pseudogene | + | 235548 | 236363 | 816 x |      | pseudogene of conserved hypothetical protein      |      |          |
| RSDT_0180    | CDS        | + | 236610 | 236849 | 240   | 79   | DNA-directed RNA polymerase subunit omega         | rpoZ | 2.7.7.6  |
| RSDT_0181    | CDS        | + | 236874 | 237983 | 1110  | 369  | chaperone protein DnaJ                            | dnaJ |          |
| RSDT_0182    | CDS        | - | 240348 | 237991 | 2358  | 785  | copper-exporting ATPase                           | copA | 3.6.3.54 |
| RSDT_0183    | CDS        | + | 240608 | 241324 | 717   | 238  | conserved hypothetical protein                    |      |          |
| RSDT_pg_033  | pseudogene | + | 241453 | 241705 | 253 x |      | pseudogene of pyruvate kinase                     | pyk  | 2.7.1.40 |
| RSDT_0184    | CDS        | - | 242840 | 241710 | 1131  | 376  | carbamoyl phosphate synthase small subunit        | carA | 6.3.5.5  |
| RSDT_0185    | CDS        | - | 246110 | 242859 | 3252  | 1083 | carbamoyl-phosphate synthase large subunit        | carB | 6.3.5.5  |
| RSDT_tRNA_10 | tRNA       | - | 246282 | 246206 | 77 xx |      | tRNA-Arg                                          |      |          |
| RSDT_0186    | CDS        | + | 246744 | 247391 | 648   | 215  | putative phosphoglycolate phosphatase             | gph  | 3.1.3.18 |
| RSDT_0187    | CDS        | + | 247470 | 247772 | 303   | 100  | conserved hypothetical protein                    |      |          |
| RSDT_0188    | CDS        | + | 247894 | 248124 | 231   | 76   | conserved hypothetical protein                    |      |          |
| RSDT_0189    | CDS        | + | 248127 | 249818 | 1692  | 563  | acetolactate synthase, large subunit              | ilvI | 2.2.1.6  |
| RSDT_0190    | CDS        | + | 249830 | 250309 | 480   | 159  | acetolactate synthase, small subunit              | ilvH | 2.2.1.6  |
| RSDT_0191    | CDS        | + | 250394 | 251395 | 1002  | 333  | ketol-acid reductoisomerase                       | ilvC | 1.1.1.86 |
| RSDT_0192    | CDS        | - | 252200 | 251529 | 672   | 223  | adenylate kinase                                  | adk  | 2.7.4.3  |
| RSDT_0193    | CDS        | + | 252784 | 255855 | 3072  | 1023 | outer membrane autotransporter                    |      |          |
| RSDT_0194    | CDS        | + | 255913 | 256833 | 921   | 306  | conserved hypothetical protein                    |      |          |

|             |            |   |        |        |        |                                                                |      |           |
|-------------|------------|---|--------|--------|--------|----------------------------------------------------------------|------|-----------|
| RSDT_0195   | CDS        | + | 256840 | 258555 | 1716   | 571 4Fe-4S ferredoxin                                          |      |           |
| RSDT_pg_034 | pseudogene | - | 259148 | 258754 | 395 x  | pseudogene of conserved hypothetical protein                   |      |           |
| RSDT_0196   | CDS        | - | 260037 | 259171 | 867    | 288 Mn2+/Zn2+ ABC transporter permease                         | znuB |           |
| RSDT_0197   | CDS        | - | 260941 | 260030 | 912    | 303 Mn2+/Zn2+ ABC transporter ATP-binding protein              | znuC |           |
| RSDT_0198   | CDS        | - | 261887 | 260928 | 960    | 319 Mn2+/Zn2+ ABC transporter substrate-binding protein        | znuA |           |
| RSDT_0199   | CDS        | - | 262616 | 261942 | 675    | 224 tRNA threonylcarbamoyladenosine biosynthesis protein tsaC  | tsaC | 2.7.7.87  |
| RSDT_pg_035 | pseudogene | - | 264907 | 262633 | 2275 x | pseudogene of conserved hypothetical protein                   |      | 2.4.99.18 |
| RSDT_0200   | CDS        | - | 265566 | 264913 | 654    | 217 ribosomal RNA small subunit methyltransferase G            | rsmG | 2.1.1.170 |
| RSDT_0201   | CDS        | + | 265764 | 266708 | 945    | 314 malonyl CoA-acyl carrier protein transacylase              | fabD | 2.3.1.39  |
| RSDT_0202   | CDS        | + | 266730 | 268385 | 1656   | 551 arginyl-tRNA synthetase                                    | argS | 6.1.1.19  |
| RSDT_0203   | CDS        | + | 268400 | 269233 | 834    | 277 conserved hypothetical protein                             |      |           |
| RSDT_0204   | CDS        | + | 269241 | 270035 | 795    | 264 ABC exporter permease                                      |      |           |
| RSDT_0205   | CDS        | + | 270044 | 270859 | 816    | 271 ABC exporter, ATP-binding protein                          |      |           |
| RSDT_0206   | CDS        | + | 271011 | 271460 | 450    | 149 ABC exporter, substrate-binding protein                    |      |           |
| RSDT_0207   | CDS        | + | 271457 | 272113 | 657    | 218 ABC exporter, auxiliary component                          |      |           |
| RSDT_0208   | CDS        | + | 272103 | 272948 | 846    | 281 VacJ family membrane protein                               |      |           |
| RSDT_0209   | CDS        | + | 272991 | 273950 | 960    | 319 oligopeptide/dipeptide ABC transporter ATP-binding protein | dppD |           |
| RSDT_0210   | CDS        | + | 273947 | 274603 | 657    | 218 conserved hypothetical protein                             |      |           |
| RSDT_pg_036 | pseudogene | - | 275663 | 274588 | 1076 x | pseudogene of multidrug efflux transporter subunit MdtA        | mdtA |           |
| RSDT_0211   | CDS        | - | 276375 | 275983 | 393    | 130 30S ribosomal protein S9                                   | rpsI |           |
| RSDT_0212   | CDS        | - | 276854 | 276420 | 435    | 144 50S ribosomal protein L13                                  | rplM |           |
| RSDT_0213   | CDS        | - | 277773 | 276985 | 789    | 262 dihydrodipicolinate reductase                              | dapB | 1.3.1.26  |
| RSDT_0214   | CDS        | - | 279878 | 277797 | 2082   | 693 NAD-dependent DNA ligase                                   | ligA | 6.5.1.2   |
| RSDT_0215   | CDS        | + | 280109 | 280957 | 849    | 282 pantoate--beta-alanine ligase                              | panC | 6.3.2.1   |
| RSDT_0216   | CDS        | + | 281002 | 282174 | 1173   | 390 S-adenosylmethionine synthase                              | metK | 2.5.1.6   |
| RSDT_0217   | CDS        | + | 282222 | 283295 | 1074   | 357 chorismate synthase                                        | aroC | 4.2.3.5   |
| RSDT_0218   | CDS        | + | 283292 | 285568 | 2277   | 758 RecD-like DNA helicase                                     |      | 3.1.11.5  |

|              |            |   |        |        |      |      |                                                                                                 |       |           |
|--------------|------------|---|--------|--------|------|------|-------------------------------------------------------------------------------------------------|-------|-----------|
| RSDT_pg_037  | pseudogene | + | 285717 | 287711 | 1995 | x    | pseudogene of CRISPR-associated helicase Cas3                                                   |       |           |
|              |            |   | 287712 | 288998 | 1287 |      | CRISPR region (remniscent)                                                                      |       |           |
| RSDT_0219    | CDS        | - | 289903 | 289103 | 801  | 266  | 23S rRNA (guanosine2251-2'-O)-methyltransferase                                                 | rlmB  | 2.1.1.185 |
| RSDT_0220    | CDS        | + | 290193 | 292124 | 1932 | 643  | conserved hypothetial protein                                                                   |       |           |
| RSDT_0221    | CDS        | + | 292167 | 293417 | 1251 | 416  | oxygen-independent coproporphyrinogen III oxidase                                               | hemN  | 1.3.99.22 |
| RSDT_pg_038  | pseudogene | - | 294343 | 293861 | 483  | x    | pseudogene of redox-sensing transcriptional repressor Rex                                       | rex   |           |
| RSDT_0222    | CDS        | - | 294680 | 294357 | 324  | 107  | FoF1 ATP synthase subunit C                                                                     | atpE  | 3.6.3.14  |
| RSDT_0223    | CDS        | - | 295448 | 294744 | 705  | 234  | FoF1 ATP synthase subunit A                                                                     | atpB  | 3.6.3.14  |
| RSDT_0224    | CDS        | - | 295964 | 295548 | 417  | 138  | FoF1 ATP synthase subunit I'                                                                    | atpI2 | 3.6.3.14  |
| RSDT_0225    | CDS        | - | 296238 | 295936 | 303  | 100  | FoF1 ATP synthase subunit I                                                                     | atpI1 | 3.6.3.14  |
| RSDT_0226    | CDS        | - | 297147 | 296581 | 567  | 188  | H <sup>+</sup> -translocating [NiFe] hydrogenase complex, iron-sulfur subunit<br>CooF           | cooF  |           |
| RSDT_0227    | CDS        | - | 297523 | 297152 | 372  | 123  | H <sup>+</sup> -translocating [NiFe] hydrogenase complex, nickel insertion<br>protein HypA      | hypA1 |           |
| RSDT_0228    | CDS        | - | 298616 | 297525 | 1092 | 363  | H <sup>+</sup> -translocating [NiFe] hydrogenase complex, NiFe-containing<br>large subunit CooH | cooH  | 1.2.99.2  |
| RSDT_0229    | CDS        | - | 299146 | 298613 | 534  | 177  | H <sup>+</sup> -translocating [NiFe] hydrogenase complex, Nuo C-like subunit<br>CooU            | cooU  | 1.2.99.2  |
| RSDT_0230    | CDS        | - | 299742 | 299158 | 585  | 194  | H <sup>+</sup> -translocating [NiFe] hydrogenase complex, iron-sulfur subunit<br>CooX           | cooX  | 1.2.99.2  |
| RSDT_0231    | CDS        | - | 300193 | 299744 | 450  | 149  | H <sup>+</sup> -translocating [NiFe] hydrogenase complex, small subunit CooL                    | cooL  | 1.2.99.2  |
| RSDT_0232    | CDS        | - | 301175 | 300204 | 972  | 323  | H <sup>+</sup> -translocating [NiFe] hydrogenase complex, transmembrane<br>subunit CooK         | cooK  | 1.2.99.2  |
| RSDT_0233    | CDS        | - | 304924 | 301172 | 3753 | 1250 | H <sup>+</sup> -translocating [NiFe] hydrogenase complex, transmembrane<br>subunit CooM         | cooM  | 1.2.99.2  |
| RSDT_0234    | CDS        | + | 305684 | 306526 | 843  | 280  | ferredoxin-NADP(+) reductase subunit beta                                                       | nfnB  | 1.18.1.2  |
| RSDT_0235    | CDS        | + | 306516 | 307946 | 1431 | 476  | ferredoxin-NADP(+) reductase subunit alpha                                                      | nfnA  | 1.18.1.2  |
| RSDT_tRNA_11 | tRNA       | + | 308023 | 308107 | 85   | xx   | tRNA-Leu                                                                                        |       |           |
| RSDT_0236    | CDS        | + | 308613 | 309008 | 396  | 131  | conserved hypothetical protein                                                                  |       |           |
| RSDT_pg_039  | pseudogene | + | 309476 | 309809 | 334  | x    | pseudogene of type III DNA restriction-modification system<br>methyltransferase subunit         |       |           |
| RSDT_0237    | CDS        | + | 309838 | 310764 | 927  | 308  | D-3-phosphoglycerate dehydrogenase                                                              | serA  | 1.1.1.95  |

|             |            |   |        |        |        |                                                        |                                                                                |       |                      |
|-------------|------------|---|--------|--------|--------|--------------------------------------------------------|--------------------------------------------------------------------------------|-------|----------------------|
| RSDT_pg_040 | pseudogene | - | 312279 | 310771 | 1509 x | pseudogene of magnesium chelatase family protein       |                                                                                |       |                      |
| RSDT_0238   | CDS        | - | 312986 | 312369 | 618    | 205                                                    | signal peptidase I                                                             | lspB  | 3.4.21.89            |
| RSDT_0239   | CDS        | - | 314263 | 313355 | 909    | 302                                                    | serine O-acetyltransferase                                                     | cysE  | 2.3.1.30             |
| RSDT_0240   | CDS        | - | 315427 | 314375 | 1053   | 350                                                    | N-acetyl-gamma-glutamyl-phosphate reductase                                    | argC  | 1.2.1.38             |
| RSDT_0241   | CDS        | - | 315756 | 315424 | 333    | 110                                                    | conserved hypothetical protein                                                 |       |                      |
| RSDT_0242   | CDS        | - | 317011 | 315827 | 1185   | 394                                                    | serine-glyoxylate transaminase                                                 |       | 2.6.1.45             |
| RSDT_0243   | CDS        | - | 318664 | 317060 | 1605   | 534                                                    | L-aspartate oxidase                                                            | nadB  | 1.4.3.16             |
| RSDT_0244   | CDS        | - | 319717 | 318746 | 972    | 323                                                    | nicotinate-nucleotide pyrophosphorylase                                        | nadC  | 2.4.2.19             |
| RSDT_0245   | CDS        | + | 319882 | 321276 | 1395   | 464                                                    | magnesium transporter                                                          | mgtE  |                      |
| RSDT_0246   | CDS        | - | 322354 | 321593 | 762    | 253                                                    | conserved hypothetical protein                                                 |       |                      |
| RSDT_0247   | CDS        | - | 323577 | 322336 | 1242   | 413                                                    | phosphopantothenoylecysteine decarboxylase/phosphopantothenate-cysteine ligase | coaBC | 4.1.1.36<br>/6.3.2.5 |
| RSDT_0248   | CDS        | - | 324164 | 323574 | 591    | 196                                                    | conserved hypothetical protein                                                 |       |                      |
| RSDT_0249   | CDS        | - | 325372 | 324131 | 1242   | 413                                                    | conserved hypothetical protein                                                 |       |                      |
| RSDT_pg_041 | pseudogene | - | 325998 | 325633 | 366 x  | pseudogene of HipA-like protein kinase                 |                                                                                |       |                      |
| RSDT_0250   | CDS        | - | 326424 | 326083 | 342    | 113                                                    | conserved hypothetical protein                                                 |       |                      |
| RSDT_0251   | CDS        | + | 326996 | 327619 | 624    | 207                                                    | NADPH-dependent FMN reductase                                                  |       |                      |
| RSDT_0252   | CDS        | + | 327772 | 329373 | 1602   | 533                                                    | FeS-binding protein                                                            |       |                      |
| RSDT_0253   | CDS        | + | 329374 | 330687 | 1314   | 437                                                    | conserved hypothetical protein                                                 |       |                      |
| RSDT_0254   | CDS        | + | 330728 | 332986 | 2259   | 752                                                    | ribonucleotide-diphosphate reductase                                           | nrdJ  | 1.17.4.1             |
| RSDT_pg_042 | pseudogene | + | 333005 | 333590 | 586 x  | pseudogene of inner membrane-bound hydrolase           |                                                                                |       |                      |
| RSDT_pg_043 | pseudogene | - | 335100 | 333511 | 1590 x | pseudogene of putative peptidoglycan lipid II flippase |                                                                                | mviN  |                      |
| RSDT_0255   | CDS        | - | 335969 | 335265 | 705    | 234                                                    | FtsH-interacting inner membrane protein                                        |       |                      |
| RSDT_0256   | CDS        | - | 336917 | 336060 | 858    | 285                                                    | adenine nucleotide alpha hydrolases superfamily protein                        |       |                      |
| RSDT_0257   | CDS        | - | 338057 | 336975 | 1083   | 360                                                    | tRNA-specific 2-thiouridylase MnmA                                             | mnmA  | 2.8.1.-              |
| RSDT_0258   | CDS        | + | 338147 | 339328 | 1182   | 393                                                    | adenylyltransferase/sulfurtransferase MoeZ                                     | moeZ  |                      |
| RSDT_0259   | CDS        | - | 340487 | 339531 | 957    | 318                                                    | cysteine synthase                                                              | cysK  | 2.5.1.47             |
| RSDT_0260   | CDS        | - | 341008 | 340568 | 441    | 146                                                    | Rrf2 family transcriptional regulator                                          | rrf2  |                      |

|              |            |   |        |        |      |     |                                                              |       |           |
|--------------|------------|---|--------|--------|------|-----|--------------------------------------------------------------|-------|-----------|
| RSDT_tRNA_12 | tRNA       | + | 341329 | 341420 | 92   | xx  | tRNA-Ser                                                     |       |           |
| RSDT_pg_044  | pseudogene | + | 341900 | 342049 | 150  | x   | pseudogene of putative endonuclease                          |       |           |
| RSDT_tRNA_13 | tRNA       | - | 342198 | 342123 | 76   | xx  | tRNA-Thr                                                     |       |           |
| RSDT_0261    | CDS        | - | 343231 | 342305 | 927  | 308 | release factor glutamine methyltransferase                   | hemK  |           |
| RSDT_tRNA_14 | tRNA       | - | 343296 | 343221 | 76   | xx  | tRNA-Lys                                                     |       |           |
| RSDT_0262    | CDS        | + | 343569 | 344183 | 615  | 204 | conserved hypothetical protein                               |       |           |
| RSDT_pg_045  | pseudogene | - | 345631 | 344272 | 1360 | x   | pseudogene of CRISPR-associated endonuclease Csm1            | csm1  |           |
| RSDT_pg_046  | pseudogene | - | 345984 | 345720 | 265  | x   | pseudogene of YafQ-family endoribonuclease                   |       |           |
| RSDT_pg_047  | pseudogene | - | 347357 | 346217 | 1141 | x   | pseudogene of putative CRISPR-associated protein             |       |           |
| RSDT_0263    | CDS        | - | 347655 | 347347 | 309  | 102 | CRISPR-associated protein Csx16                              | csx16 |           |
| RSDT_0264    | CDS        | - | 348687 | 347728 | 960  | 319 | 16S rRNA (adenine1518-N6/adenine1519-N6)-dimethyltransferase | ksgA  | 2.1.1.182 |
| RSDT_pg_048  | pseudogene | - | 349775 | 348695 | 1081 | x   | pseudogene of elongation factor G (EF-G)                     | fusA2 |           |
| RSDT_pg_049  | pseudogene | - | 351342 | 349780 | 1563 | x   | pseudogene of GTPase HflX                                    | hflX  |           |
| RSDT_0265    | CDS        | - | 351963 | 351373 | 591  | 196 | IMP cyclohydrolase                                           | purH  | 3.5.4.10  |
| RSDT_0266    | CDS        | + | 352196 | 353236 | 1041 | 346 | GAF domain-containing protein                                |       |           |
| RSDT_0267    | CDS        | + | 353239 | 354264 | 1026 | 341 | rod shape-determining protein MreB                           | mreB  |           |
| RSDT_0268    | CDS        | - | 354860 | 354342 | 519  | 172 | NUDIX hydrolase                                              |       |           |
| RSDT_0269    | CDS        | + | 354919 | 355320 | 402  | 133 | ribosomal-protein-alanine acetyltransferase                  | rimI  | 2.3.1.128 |
| RSDT_0270    | CDS        | + | 355343 | 356101 | 759  | 252 | triose-phosphate isomerase                                   | tpiA  | 5.3.1.1   |
| RSDT_0271    | CDS        | + | 356182 | 356547 | 366  | 121 | preprotein translocase subunit SecG                          | secG  |           |
| RSDT_0272    | CDS        | + | 356853 | 357476 | 624  | 207 | Smr family protein                                           |       |           |
| RSDT_0273    | CDS        | - | 357884 | 357516 | 369  | 122 | conserved hypothetical protein                               |       |           |
| RSDT_0274    | CDS        | - | 360606 | 357865 | 2742 | 913 | DNA mismatch repair protein MutS                             | mutS  |           |
| RSDT_0275    | CDS        | - | 361155 | 360718 | 438  | 145 | conserved hypothetical protein                               |       |           |
| RSDT_0276    | CDS        | - | 361736 | 361218 | 519  | 172 | HIT family hydrolase                                         |       |           |
| RSDT_pg_050  | pseudogene | + | 362102 | 362383 | 282  | x   | pseudogene of addiction module antitoxin RelB                | relB  |           |
| RSDT_pg_051  | pseudogene | + | 362385 | 362566 | 182  | x   | pseudogene of addiction module toxin RelE                    | relE  |           |

|              |            |   |        |        |       |                                                        |               |
|--------------|------------|---|--------|--------|-------|--------------------------------------------------------|---------------|
| RSDT_0277    | CDS        | - | 363014 | 362661 | 354   | 117 hypothetical protein                               |               |
| RSDT_0278    | CDS        | + | 363051 | 364154 | 1104  | 367 multidrug efflux pump priplasmic subunit AcrA      | acrA          |
| RSDT_0279    | CDS        | + | 364161 | 367367 | 3207  | 1068 multidrug efflux pump inner membrane subunit AcrB | acrB          |
| RSDT_0280    | CDS        | + | 367364 | 368866 | 1503  | 500 multidrug efflux pump outer membrane subunit TolC  | tolC2         |
| RSDT_0281    | CDS        | + | 368863 | 369495 | 633   | 210 conserved hypothetical protein                     |               |
| RSDT_0282    | CDS        | - | 373892 | 369678 | 4215  | 1404 DNA-directed RNA polymerase subunit beta'         | rpoC 2.7.7.6  |
| RSDT_0283    | CDS        | - | 378097 | 373961 | 4137  | 1378 DNA-directed RNA polymerase subunit beta          | rpoB 2.7.7.6  |
| RSDT_0284    | CDS        | - | 378910 | 378521 | 390   | 129 50S ribosomal protein L7/L12                       | rplL          |
| RSDT_0285    | CDS        | - | 379492 | 378965 | 528   | 175 50S ribosomal protein L10                          | rplJ          |
| RSDT_0286    | CDS        | - | 380474 | 379767 | 708   | 235 50S ribosomal protein L1                           | rplA          |
| RSDT_0287    | CDS        | - | 381082 | 380660 | 423   | 140 50S ribosomal protein L11                          | rplK          |
| RSDT_0288    | CDS        | - | 381723 | 381151 | 573   | 190 transcription antitermination factor NusG          | nusG          |
| RSDT_0289    | CDS        | - | 381972 | 381733 | 240   | 79 preprotein translocase subunit SecE                 | secE          |
| RSDT_tRNA_15 | tRNA       | - | 382069 | 381993 | 77 xx | tRNA-Trp                                               |               |
| RSDT_0290    | CDS        | - | 382262 | 382113 | 150   | 49 50S ribosomal protein L33                           | rpmG          |
| RSDT_0291    | CDS        | - | 383462 | 382269 | 1194  | 397 translation elongation factor Tu                   | tuf           |
| RSDT_tRNA_16 | tRNA       | - | 383747 | 383672 | 76 xx | tRNA-Gly                                               |               |
| RSDT_tRNA_17 | tRNA       | - | 383985 | 383900 | 86 xx | tRNA-Tyr                                               |               |
| RSDT_0292    | CDS        | - | 385210 | 384317 | 894   | 297 putative cell wall-associated hydrolase            |               |
| RSDT_pg_052  | pseudogene | - | 385713 | 385304 | 410 x | pseudogene of flagellar basal body rod protein FlgC    | flgC          |
| RSDT_0293    | CDS        | - | 386621 | 385812 | 810   | 269 GTP cyclohydrolase                                 | folE 3.5.4.16 |
| RSDT_0294    | CDS        | - | 387040 | 386621 | 420   | 139 nickel-responsive transcriptional regulator NikR   | nikR          |
| RSDT_0295    | CDS        | + | 387220 | 387708 | 489   | 162 colicin V production family protein                |               |
| RSDT_0296    | CDS        | + | 387776 | 388573 | 798   | 265 nucleoside triphosphate pyrophosphohydrolase       | mazG 3.6.1.8  |
| RSDT_0297    | CDS        | + | 388582 | 390744 | 2163  | 720 trehalose synthase-like protein                    |               |
| RSDT_pg_053  | pseudogene | + | 391051 | 391243 | 193 x | pseudogene of integrase                                |               |
| RSDT_0298    | CDS        | - | 391698 | 391330 | 369   | 122 conserved hypothetical protein                     |               |

|              |            |   |        |        |       |                                                               |      |           |
|--------------|------------|---|--------|--------|-------|---------------------------------------------------------------|------|-----------|
| RSDT_0299    | CDS        | - | 393006 | 391741 | 1266  | 421 PaaK-like carboxylate-CoA ligase                          |      |           |
| RSDT_0300    | CDS        | - | 394919 | 393087 | 1833  | 610 glutamine-fructose-6-phosphate transaminase (isomerizing) | glmS | 2.6.1.16  |
| RSDT_0301    | CDS        | - | 396474 | 394963 | 1512  | 503 putative peptidyl-prolyl cis-trans isomerase D            | ppiD | 5.2.1.8   |
| RSDT_pg_054  | pseudogene | + | 396477 | 396726 | 250 x | pseudogene of atypical 2-Cys peroxiredoxin                    | tpx  | 1.11.1.15 |
| RSDT_0302    | CDS        | - | 398051 | 396759 | 1293  | 430 transcription termination factor Rho                      | rho  |           |
| RSDT_0303    | CDS        | - | 398736 | 398230 | 507   | 168 putative rRNA transcriptional regulator CarD              | carD |           |
| RSDT_0304    | CDS        | - | 399571 | 398948 | 624   | 207 aminoacyl-tRNA hydrolase                                  | pth  | 3.1.1.29  |
| RSDT_0305    | CDS        | - | 400448 | 399561 | 888   | 295 conserved hypothetical protein                            |      |           |
| RSDT_0306    | CDS        | - | 401127 | 400507 | 621   | 206 50S ribosomal protein L25                                 | rplY |           |
| RSDT_0307    | CDS        | - | 402086 | 401139 | 948   | 315 ribose-phosphate pyrophosphokinase                        | prsA | 2.7.6.1   |
| RSDT_tRNA_18 | tRNA       | - | 402191 | 402117 | 75 xx | tRNA-Gln                                                      |      |           |
| RSDT_0308    | CDS        | - | 403096 | 402197 | 900   | 299 4-diphosphocytidyl-2-C-methyl-D-erythritol kinase         | ispE | 2.7.1.148 |
| RSDT_0309    | CDS        | - | 403632 | 403096 | 537   | 178 ATP-dependent protease, peptidase subunit HslV            | hslV | 3.4.25.2  |
| RSDT_0310    | CDS        | - | 405041 | 403632 | 1410  | 469 M48 family peptidase                                      |      |           |
| RSDT_0311    | CDS        | - | 406501 | 405050 | 1452  | 483 Zn-dependent M48 family peptidase                         |      |           |
| RSDT_0312    | CDS        | - | 406965 | 406525 | 441   | 146 cysteinyl-tRNA synthetase                                 | cysS | 6.1.1.16  |
| RSDT_0313    | CDS        | - | 407789 | 407001 | 789   | 262 ribose 5-phosphate isomerase B                            | rpiB | 5.3.1.26  |
| RSDT_0314    | CDS        | - | 409561 | 407786 | 1776  | 591 conserved hypothetical protein                            |      |           |
| RSDT_0315    | CDS        | - | 410615 | 409563 | 1053  | 350 conserved hypothetical protein                            |      |           |
| RSDT_0316    | CDS        | + | 410751 | 413147 | 2397  | 798 vitamin B12-dependent methionine synthase                 | metH | 2.1.1.13  |
| RSDT_0317    | CDS        | + | 413316 | 413831 | 516   | 171 amino-acid N-acetyltransferase                            | argA | 2.3.1.1   |
| RSDT_0318    | CDS        | + | 414210 | 414917 | 708   | 235 conserved hypothetical protein                            |      |           |
| RSDT_0319    | CDS        | - | 415618 | 414938 | 681   | 226 outer membrane lipoprotein carrier protein LolA           | lolA |           |
| RSDT_0320    | CDS        | - | 418046 | 415689 | 2358  | 785 chromosome segregation ATPase FtsK                        | ftsK |           |
| RSDT_0321    | CDS        | - | 418749 | 418192 | 558   | 185 translation elongation factor P                           | efp  |           |
| RSDT_0322    | CDS        | - | 420472 | 419195 | 1278  | 425 divalent metal ions efflux pump                           |      |           |
| RSDT_0323    | CDS        | - | 421286 | 420555 | 732   | 243 outer membrane assembly lipoprotein BamD                  | bamD |           |

|              |            |   |        |        |        |                                                                         |      |            |
|--------------|------------|---|--------|--------|--------|-------------------------------------------------------------------------|------|------------|
| RSDT_0324    | CDS        | - | 422199 | 421279 | 921    | 306 NADPH-dependent thioredoxin reductase                               | trxB | 1.8.1.9    |
| RSDT_0325    | CDS        | - | 422525 | 422202 | 324    | 107 thioredoxin                                                         | trxA |            |
| RSDT_0326    | CDS        | - | 423731 | 422622 | 1110   | 369 tRNA threonylcarbamoyladenosine biosynthesis protein TsaD           | tsaD |            |
| RSDT_0327    | CDS        | - | 424765 | 423728 | 1038   | 345 fructose-1,6-bisphosphatase class 1                                 | fbp  | 3.1.3.11   |
| RSDT_0328    | CDS        | - | 425842 | 424826 | 1017   | 338 conserved hypothetical protein                                      |      |            |
| RSDT_0329    | CDS        | - | 426830 | 425859 | 972    | 323 conserved hypothetical protein                                      |      |            |
| RSDT_0330    | CDS        | - | 427137 | 426814 | 324    | 107 septum formation initiator FtsB                                     | ftsB |            |
| RSDT_0331    | CDS        | - | 427394 | 427140 | 255    | 84 conserved hypothetical protein                                       |      |            |
| RSDT_0332    | CDS        | - | 427942 | 427403 | 540    | 179 CDP-diacylglycerol-glycerol-3-phosphate 3-phosphatidyltransferase   | pgsA | 2.7.8.5    |
| RSDT_0333    | CDS        | - | 428693 | 428004 | 690    | 229 protein-L-isoaspartate O-methyltransferase                          | pcm  | 2.1.1.77   |
| RSDT_0334    | CDS        | + | 428833 | 430155 | 1323   | 440 Zn-dependent M23 family peptidase                                   |      |            |
| RSDT_0335    | CDS        | - | 430501 | 430208 | 294    | 97 conserved hypothetical protein                                       |      |            |
| RSDT_0336    | CDS        | - | 431033 | 430515 | 519    | 172 2-amino-4-hydroxy-6-hydroxymethyldihydropteridine pyrophosphokinase | folK | 2.7.6.3    |
| RSDT_0337    | CDS        | - | 432787 | 431192 | 1596   | 531 DNA repair/recombination protein RecN                               | recN |            |
| RSDT_0338    | CDS        | - | 433641 | 432808 | 834    | 277 oligopeptide/dipeptide ABC transporter permease protein DppC        | dppC |            |
| RSDT_0339    | CDS        | - | 434669 | 433641 | 1029   | 342 oligopeptide/dipeptide ABC transporter permease protein DppB        | dppB |            |
| RSDT_pg_055  | pseudogene | - | 435167 | 434681 | 487 x  | pseudogene of conserved hypothetical protein                            |      |            |
| RSDT_pg_056  | pseudogene | - | 435720 | 435201 | 520 x  | pseudogene of putative recombination-associated protein RdgC            | rdgC |            |
| RSDT_0340    | CDS        | + | 435892 | 436641 | 750    | 249 23S rRNA pseudouridine synthase                                     | rluB | 5.4.99.22  |
| RSDT_0341    | CDS        | - | 438285 | 436645 | 1641   | 546 phosphoglucomutase                                                  | pgm  | 5.4.2.2    |
| RSDT_0342    | CDS        | - | 439757 | 438327 | 1431   | 476 periplasmic peptidase Do                                            |      | 3.4.21.107 |
| RSDT_0343    | CDS        | - | 440976 | 439993 | 984    | 327 site-specific tyrosine recombinase XerC                             | xerC |            |
| RSDT_pg_057  | pseudogene | - | 442183 | 441028 | 1156 x | pseudogene of recombination-mediator protein                            | smf  |            |
| RSDT_0344    | CDS        | + | 442609 | 443583 | 975    | 324 conserved hypothetical protein                                      |      |            |
| RSDT_pg_058  | pseudogene | - | 444888 | 443689 | 1200 x | pseudogene of conserved hypothetical protein                            |      |            |
| RSDT_pg_059  | pseudogene | - | 445766 | 444900 | 867 x  | pseudogene of conserved hypothetical protein                            |      |            |
| RSDT_tRNA_19 | tRNA       | - | 446205 | 446130 | 76 xx  | tRNA-Val                                                                |      |            |



|             |            |   |        |        |      |     |                                                                                         |      |           |
|-------------|------------|---|--------|--------|------|-----|-----------------------------------------------------------------------------------------|------|-----------|
| RSDT_0345   | CDS        | - | 447552 | 446227 | 1326 | 441 | cell division protein FtsZ                                                              | ftsZ |           |
| RSDT_0346   | CDS        | - | 448830 | 447595 | 1236 | 411 | cell division protein FtsA                                                              | ftsA |           |
| RSDT_0347   | CDS        | - | 449750 | 448827 | 924  | 307 | cell division protein FtsQ                                                              | ftsQ |           |
| RSDT_0348   | CDS        | - | 450625 | 449735 | 891  | 296 | UDP-N-acetylmuramate dehydrogenase                                                      | murB | 1.3.1.98  |
| RSDT_0349   | CDS        | - | 451991 | 450618 | 1374 | 457 | UDP-N-acetylmuramate-L-alanine ligase                                                   | murC | 6.3.2.8   |
| RSDT_0350   | CDS        | - | 453112 | 452036 | 1077 | 358 | UDP-diphospho-muramoylpentapeptide beta-N-acetylglucosaminyltransferase                 | murG | 2.4.1.227 |
| RSDT_0351   | CDS        | - | 454272 | 453094 | 1179 | 392 | cell division protein FtsW                                                              | ftsW |           |
| RSDT_0352   | CDS        | - | 455579 | 454269 | 1311 | 436 | UDP-N-acetylmuramoyl-L-alanine-D-glutamate ligase                                       | murD | 6.3.2.9   |
| RSDT_0353   | CDS        | - | 456675 | 455599 | 1077 | 358 | phospho-N-acetylmuramoyl-pentapeptide-transferase                                       | mraY | 2.7.8.13  |
| RSDT_0354   | CDS        | - | 458125 | 456665 | 1461 | 486 | UDP-N-acetylmuramoyl-tripeptide-D-alanyl-D-alanine ligase                               | murF | 6.3.2.10  |
| RSDT_0355   | CDS        | - | 459567 | 458116 | 1452 | 483 | UDP-N-acetylmuramoyl-L-alanyl-D-glutamate-2,6-diaminopimelate ligase                    | murE | 6.3.2.13  |
| RSDT_0356   | CDS        | - | 461675 | 459570 | 2106 | 701 | peptidoglycan glycosyltransferase FtsI                                                  | ftsI | 2.4.1.129 |
| RSDT_pg_060 | pseudogene | - | 462012 | 461710 | 303  | x   | pseudogene of conserved hypothetical protein                                            |      |           |
| RSDT_0357   | CDS        | - | 462998 | 462009 | 990  | 329 | 16S rRNA (cytosine1402-N4)-methyltransferase                                            | rsmH | 2.1.1.199 |
| RSDT_0358   | CDS        | - | 463527 | 463075 | 453  | 150 | cell division protein MraZ                                                              | mraZ |           |
| RSDT_pg_061 | pseudogene | - | 463797 | 463606 | 192  | x   | pseudogene of transposase                                                               |      |           |
| RSDT_0359   | CDS        | + | 463873 | 464253 | 381  | 126 | desulfoferrodoxin                                                                       | dfx  | 1.15.1.2  |
| RSDT_0360   | CDS        | + | 464307 | 464444 | 138  | 45  | rubredoxin                                                                              | rdx  |           |
| RSDT_pg_062 | pseudogene | + | 464524 | 464618 | 95   | x   | pseudogene of rubredoxin-oxygen oxidoreductase                                          | roo  |           |
| RSDT_pg_063 | pseudogene | + | 464621 | 464995 | 375  | x   | pseudogene of type I site-specific restriction-modification system, restriction subunit | hsdR |           |
| RSDT_0361   | CDS        | - | 465742 | 465035 | 708  | 235 | conserved hypothetical protein                                                          |      |           |
| RSDT_0362   | CDS        | - | 466961 | 465780 | 1182 | 393 | quinone-modifying oxidoreductase transmembrane subunit C                                | qmoC |           |
| RSDT_0363   | CDS        | - | 469224 | 466975 | 2250 | 749 | quinone-modifying oxidoreductase subunit B                                              | qmoB |           |
| RSDT_0364   | CDS        | - | 470467 | 469232 | 1236 | 411 | quinone-modifying oxidoreductase subunit A                                              | qmoA |           |
| RSDT_0365   | CDS        | - | 472576 | 470588 | 1989 | 662 | adenylylsulfate reductase, subunit A                                                    | aprA | 1.8.99.2  |
| RSDT_0366   | CDS        | - | 473102 | 472614 | 489  | 162 | adenylylsulfate reductase, subunit B                                                    | aprB | 1.8.99.2  |

|             |            |   |        |        |      |      |                                                                                 |         |           |
|-------------|------------|---|--------|--------|------|------|---------------------------------------------------------------------------------|---------|-----------|
| RSDT_0367   | CDS        | + | 473403 | 475088 | 1686 | 561  | conserved hypothetical protein                                                  |         |           |
| RSDT_0368   | CDS        | - | 478885 | 475307 | 3579 | 1192 | phosphoenolpyruvate synthase                                                    | pps1    | 2.7.9.2   |
| RSDT_0369   | CDS        | - | 482685 | 478984 | 3702 | 1233 | pyruvate carboxylase                                                            | pyc     | 6.4.1.1   |
| RSDT_0370   | CDS        | - | 483517 | 482714 | 804  | 267  | biotin-[acetyl-CoA-carboxylase] ligase                                          | birA    | 6.3.4.15  |
| RSDT_0371   | CDS        | - | 483962 | 483531 | 432  | 143  | YbeY-like metal-dependent hydrolase                                             |         |           |
| RSDT_0372   | CDS        | - | 486330 | 484027 | 2304 | 767  | membrane-associated HD superfamily hydrolase                                    |         |           |
| RSDT_pg_064 | pseudogene | + | 486807 | 487782 | 976  | x    | pseudogene of CRISPR-associated endonuclease Cas1 subtype I-F/YPEST             | cas1    |           |
| RSDT_pg_065 | pseudogene | + | 487785 | 489160 | 1376 | x    | pseudogene of CRISPR-associated nuclease/helicase Cas3 subtype I-F/YPEST        | cas3    |           |
| RSDT_0373   | CDS        | - | 491683 | 489200 | 2484 | 827  | ATP-dependent protease La                                                       | lon     | 3.4.21.53 |
| RSDT_pg_066 | pseudogene | - | 492391 | 491698 | 694  | x    | pseudogene of uncharacterized protein RadC                                      | radC    |           |
| RSDT_0374   | CDS        | - | 493144 | 492587 | 558  | 185  | conserved hypothetical protein                                                  |         |           |
| RSDT_0375   | CDS        | - | 494361 | 493216 | 1146 | 381  | conserved hypothetical protein                                                  |         |           |
| RSDT_0376   | CDS        | + | 494480 | 495127 | 648  | 215  | conserved hypothetical protein                                                  |         |           |
| RSDT_0377   | CDS        | - | 496590 | 495124 | 1467 | 488  | putative Mo <sup>2+</sup> ABC transporter ATP-binding protein                   | modF    |           |
| RSDT_0378   | CDS        | - | 497444 | 496608 | 837  | 278  | histidinol-phosphatase                                                          | hisJ    | 3.1.3.15  |
| RSDT_0379   | CDS        | - | 497974 | 497441 | 534  | 177  | bifunctional pyrimidine operon regulator PyrR/ uracil phosphoribosyltransferase | pyrR    | 2.4.2.9   |
| RSDT_0380   | CDS        | - | 499765 | 498527 | 1239 | 412  | HD superfamily hydrolase                                                        |         |           |
| RSDT_pg_067 | pseudogene | + | 499993 | 500357 | 365  | x    | pseudogene of diphosphate-fructose-6-phosphate 1-phosphotransferase             | ppi-pfk | 2.7.1.90  |
| RSDT_0381   | CDS        | + | 500415 | 503621 | 3207 | 1068 | AddA-like putative DNA repair protein                                           |         |           |
| RSDT_0382   | CDS        | + | 503625 | 506546 | 2922 | 973  | AddB-like putative DNA repair protein                                           |         |           |
| RSDT_0383   | CDS        | - | 508382 | 506670 | 1713 | 570  | 30S ribosomal protein S1                                                        | rpsA    |           |
| RSDT_0384   | CDS        | - | 510635 | 508551 | 2085 | 694  | glycyl-tRNA synthetase subunit beta                                             | glyS    | 6.1.1.14  |
| RSDT_0385   | CDS        | - | 511517 | 510639 | 879  | 292  | glycyl-tRNA synthetase subunit alpha                                            | glyQ    | 6.1.1.14  |
| RSDT_0386   | CDS        | - | 512341 | 511589 | 753  | 250  | DNA repair/recombination protein RecO                                           | recO    |           |
| RSDT_0387   | CDS        | - | 513209 | 512376 | 834  | 277  | conserved hypothetical protein                                                  |         |           |
| RSDT_0388   | CDS        | - | 514175 | 513240 | 936  | 311  | peptidyl-prolyl cis-trans isomerase                                             | surA    | 5.2.1.8   |

|             |            |   |        |        |        |      |                                                               |       |                       |
|-------------|------------|---|--------|--------|--------|------|---------------------------------------------------------------|-------|-----------------------|
| RSDT_0389   | CDS        | - | 517776 | 514324 | 3453   | 1150 | transcription-repair coupling factor                          | mfd   |                       |
| RSDT_0390   | CDS        | - | 518257 | 517901 | 357    | 118  | conserved hypothetical protein                                |       |                       |
| RSDT_0391   | CDS        | + | 518601 | 519158 | 558    | 185  | multiple promoter invertase                                   | mpi   |                       |
| RSDT_0392   | CDS        | + | 519614 | 520309 | 696    | 231  | siroheme synthase                                             | cysG  | 1.3.1.76/<br>4.99.1.4 |
| RSDT_0393   | CDS        | + | 520296 | 521123 | 828    | 275  | cytochrome c assembly protein                                 | ccsA  |                       |
| RSDT_0394   | CDS        | + | 521135 | 522409 | 1275   | 424  | glutamyl-tRNA reductase                                       | hemA  | 1.2.1.70              |
| RSDT_0395   | CDS        | + | 522499 | 523572 | 1074   | 357  | tRNA(Ile)-lysidine synthetase                                 | tilS  | 6.3.4.19              |
| RSDT_pg_068 | pseudogene | + | 523697 | 524107 | 411 x  |      | pseudogene of DNA adenine methyltransferase                   | dam   | 2.1.1.72              |
| RSDT_0396   | CDS        | - | 526601 | 524304 | 2298   | 765  | glutamate synthase (NADPH-GOGAT) subunit 3                    | gltB3 | 1.4.1.13              |
| RSDT_0397   | CDS        | - | 528340 | 526709 | 1632   | 543  | glutamate synthase (NADPH-GOGAT) subunit 2                    | gltB2 | 1.4.1.13              |
| RSDT_0398   | CDS        | - | 529398 | 528328 | 1071   | 356  | glutamate synthase (NADPH-GOGAT) subunit 1                    | gltB1 | 1.4.1.13              |
| RSDT_pg_069 | pseudogene | - | 529941 | 529627 | 315 x  |      | pseudogene of UvrD-like DNA helicase                          |       |                       |
| RSDT_pg_070 | pseudogene | - | 530859 | 529941 | 919 x  |      | pseudogene of DNA methyltransferase                           |       |                       |
| RSDT_0399   | CDS        | - | 531848 | 531315 | 534    | 177  | conserved hypothetical protein                                |       |                       |
| RSDT_0400   | CDS        | - | 533260 | 532034 | 1227   | 408  | LL-diaminopimelate aminotransferase                           | dapL  | 2.6.1.83              |
| RSDT_0401   | CDS        | - | 534135 | 533269 | 867    | 288  | diaminopimelate epimerase                                     | dapF  | 5.1.1.7               |
| RSDT_0402   | CDS        | - | 536574 | 534379 | 2196   | 731  | glutamine synthetase                                          | glnA  | 6.3.1.2               |
| RSDT_pg_071 | pseudogene | - | 536817 | 536668 | 150 x  |      | pseudogene of nitrogen regulatory protein P-II                | glnB  |                       |
| RSDT_pg_072 | pseudogene | - | 537273 | 536828 | 446 x  |      | pseudogene of NtrC-like nitrogen regulatory protein           | glnG  |                       |
| RSDT_0403   | CDS        | + | 537439 | 539400 | 1962   | 653  | molecular chaperone Hsp90                                     | htpG  |                       |
| RSDT_0404   | CDS        | - | 540012 | 539467 | 546    | 181  | conserved hypothetical protein                                |       |                       |
| RSDT_0405   | CDS        | - | 540996 | 540013 | 984    | 327  | Fructose-1,6-bisphosphatase class 2                           | glpX  | 3.1.3.11              |
| RSDT_0406   | CDS        | + | 541301 | 541819 | 519    | 172  | dUTP pyrophosphatase                                          | dut   | 3.6.1.23              |
| RSDT_0407   | CDS        | + | 541894 | 543090 | 1197   | 398  | acetylornithine aminotransferase                              | argD  | 2.6.1.11              |
| RSDT_pg_073 | pseudogene | - | 545764 | 543306 | 2459 x |      | pseudogene of CRISPR-associated nuclease/helicase Cas3 type I | cas3  |                       |
| RSDT_0408   | CDS        | + | 546169 | 547368 | 1200   | 399  | putative Fe <sup>2+</sup> permease transmembrane component    |       |                       |
| RSDT_0409   | CDS        | + | 547416 | 548000 | 585    | 194  | putative Fe <sup>2+</sup> permease periplasmic component      |       |                       |

|             |            |   |        |        |       |                                                                         |       |           |
|-------------|------------|---|--------|--------|-------|-------------------------------------------------------------------------|-------|-----------|
| RSDT_0410   | CDS        | + | 548105 | 549355 | 1251  | 416 conserved membrane protein                                          |       |           |
| RSDT_0411   | CDS        | + | 549366 | 550664 | 1299  | 432 ABC efflux transporter permease                                     |       |           |
| RSDT_0412   | CDS        | + | 550670 | 551806 | 1137  | 378 ABC efflux transporter permease                                     |       |           |
| RSDT_0413   | CDS        | + | 551819 | 552493 | 675   | 224 ABC efflux transporter ATP-binding protein                          |       |           |
| RSDT_0414   | CDS        | - | 553424 | 552543 | 882   | 293 4-hydroxy-tetrahydrodipicolinate synthase                           | dapA  |           |
| RSDT_0415   | CDS        | - | 553733 | 553455 | 279   | 92 integration host factor B                                            | ihfB  |           |
| RSDT_0416   | CDS        | - | 555115 | 554006 | 1110  | 369 peptide chain release factor 2 (RF-2)                               | prfB  |           |
| RSDT_0417   | CDS        | - | 556663 | 555143 | 1521  | 506 apolipoprotein N-acyltransferase                                    | Int   |           |
| RSDT_0418   | CDS        | - | 557601 | 556720 | 882   | 293 Mg <sup>2+</sup> /Co <sup>2+</sup> efflux pump CorC                 | corC  |           |
| RSDT_0419   | CDS        | - | 559788 | 557836 | 1953  | 650 tRNA uridine 5-carboxymethylaminomethyl modification protein        | mnmG  |           |
| RSDT_pg_074 | pseudogene | - | 560592 | 559781 | 812 x | pseudogene of succinyl-diaminopimelate desuccinylase                    | dapE  | 3.5.1.18  |
| RSDT_0420   | CDS        | - | 560930 | 560667 | 264   | 87 conserved hypothetical protein                                       |       |           |
| RSDT_pg_075 | pseudogene | - | 562356 | 562001 | 356 x | pseudogene of DNA mismatch repair endonuclease                          | vsr   |           |
| RSDT_0421   | CDS        | - | 563313 | 562609 | 705   | 234 metal-dependent hydrolase                                           |       |           |
| RSDT_0422   | CDS        | - | 563936 | 563373 | 564   | 187 3-octaprenyl-4-hydroxybenzoate carboxy-lyase                        | ubiX  |           |
| RSDT_0423   | CDS        | - | 565544 | 564096 | 1449  | 482 ABC efflux transporter ATP-binding protein                          |       |           |
| RSDT_0424   | CDS        | - | 566738 | 565548 | 1191  | 396 ABC efflux transporter permease                                     |       |           |
| RSDT_pg_076 | pseudogene | - | 567471 | 566893 | 579 x | pseudogene of conserved hypothetical protein                            |       |           |
| RSDT_0425   | CDS        | + | 568035 | 568928 | 894   | 297 periplasmic sirohydrochlorin cobaltochelate/ferrochelate            | cbiKp | 4.99.1.3  |
| RSDT_0426   | CDS        | + | 568929 | 570002 | 1074  | 357 Fe <sup>3+</sup> -complex ABC transporter permease                  | fhuB  |           |
| RSDT_0427   | CDS        | + | 570002 | 570868 | 867   | 288 Fe <sup>3+</sup> -complex ABC transporter ATP-binding protein       | fhuC  | 3.6.3.34  |
| RSDT_0428   | CDS        | + | 570921 | 571823 | 903   | 300 Fe <sup>3+</sup> -complex ABC transporter substrate-binding protein | fhuD  |           |
| RSDT_0429   | CDS        | + | 571863 | 572597 | 735   | 244 cobalt-precorrin-2 C(20)-methyltransferase                          | cbiL  | 2.1.1.151 |
| RSDT_pg_077 | pseudogene | + | 572744 | 573584 | 841 x | pseudogene of conserved hypothetical protein                            |       |           |
| RSDT_pg_078 | pseudogene | - | 575763 | 574781 | 983 x | pseudogene of Putative signal peptide peptidase SppA (protease IV)      | sppA  |           |
| RSDT_0430   | CDS        | - | 577467 | 575791 | 1677  | 558 acyl-CoA synthetases (AMP-forming)                                  |       |           |
| RSDT_0431   | CDS        | - | 578051 | 577482 | 570   | 189 PuvR-like transcriptional regulator                                 |       |           |

|              |            |   |        |        |        |     |                                                                                       |       |                      |
|--------------|------------|---|--------|--------|--------|-----|---------------------------------------------------------------------------------------|-------|----------------------|
| RSDT_0432    | CDS        | + | 578278 | 579555 | 1278   | 425 | phosphoribosylaminoimidazolecarboxamide formyltransferase/IMP cyclohydrolase          | purH  | 2.1.2.3/<br>3.5.4.10 |
| RSDT_0433    | CDS        | + | 579564 | 581084 | 1521   | 506 | cobyrinic acid a,c-diamide synthase                                                   | cbiA1 | 6.3.5.11             |
| RSDT_0434    | CDS        | + | 581326 | 581697 | 372    | 123 | conserved hypothetical protein                                                        |       |                      |
| RSDT_0435    | CDS        | - | 582951 | 581902 | 1050   | 349 | biotin synthase                                                                       | bioB  | 2.8.1.6              |
| RSDT_0436    | CDS        | - | 583440 | 583036 | 405    | 134 | ROS/MucR family transcriptional regulator                                             |       |                      |
| RSDT_0437    | CDS        | - | 584366 | 583626 | 741    | 246 | conserved hypothetical protein                                                        |       |                      |
| RSDT_pg_079  | pseudogene | - | 584614 | 584426 | 189 x  |     | pseudogene of ornithine carbamoyltransferase                                          | argF2 | 2.1.3.3              |
| RSDT_0438    | CDS        | - | 585656 | 584925 | 732    | 243 | rare lipoprotein A                                                                    | rlpA1 |                      |
| RSDT_0439    | CDS        | - | 587339 | 585978 | 1362   | 453 | methylenetetrahydrofolate-tRNA-(uracil54-C5)-methyltransferase                        | trmFO | 2.1.1.74             |
| RSDT_0440    | CDS        | + | 587456 | 587764 | 309    | 102 | 50S ribosomal protein L21                                                             | rplU  |                      |
| RSDT_0441    | CDS        | + | 587792 | 588061 | 270    | 89  | 50S ribosomal protein L27                                                             | rpmA  |                      |
| RSDT_0442    | CDS        | + | 588391 | 589452 | 1062   | 353 | uncharacterized glycosyltransferase                                                   |       |                      |
| RSDT_pg_080  | pseudogene | - | 590728 | 589662 | 1067 x |     | pseudogene of nitrate/sulfonate/bicarbonate ABC transporter substrate-binding protein |       |                      |
| RSDT_pg_081  | pseudogene | - | 590959 | 590753 | 207 x  |     | pseudogene of nitrate/sulfonate/bicarbonate ABC transporter ATP-binding protein       |       |                      |
| RSDT_0443    | CDS        | - | 591938 | 591138 | 801    | 266 | hydroxymethylpyrimidine/phosphomethylpyrimidine kinase                                | thiD  | 2.7.1.49<br>/2.7.4.7 |
| RSDT_0444    | CDS        | - | 594641 | 591999 | 2643   | 880 | Zn-dependent M16 family peptidase                                                     |       |                      |
| RSDT_pg_082  | pseudogene | - | 595171 | 594961 | 211 x  |     | pseudogene of branched-chain amino acid ABC transporter substrate-binding protein     | LivK  |                      |
| RSDT_pg_083  | pseudogene | + | 595664 | 596002 | 339 x  |     | pseudogene of outer membrane autotransporter                                          |       |                      |
| RSDT_tRNA_20 | tRNA       | - | 596152 | 596078 | 75 xx  |     | tRNA-Gly                                                                              |       |                      |
| RSDT_tRNA_21 | tRNA       | + | 596456 | 596532 | 77 xx  |     | tRNA-Arg                                                                              |       |                      |
| RSDT_pg_084  | pseudogene | - | 596842 | 596665 | 178 x  |     | pseudogene of glycine cleavage system H protein                                       | gcvH  |                      |
| RSDT_0445    | CDS        | - | 598467 | 597046 | 1422   | 473 | glycine cleavage system L protein                                                     | gcvL  | 1.8.1.4              |
| RSDT_pg_085  | pseudogene | - | 598922 | 598498 | 425 x  |     | pseudogene of peroxiredoxin                                                           | OsmC  |                      |
| RSDT_pg_086  | pseudogene | + | 599141 | 599671 | 531 x  |     | pseudogene of putative metabolite:H <sup>+</sup> symporter                            | ydjE  |                      |
| RSDT_pg_087  | pseudogene | + | 599769 | 600410 | 642 x  |     | pseudogene of putative cAMP-activated global transcriptional regulator CRP            | crp   |                      |

|             |            |   |        |        |       |     |                                                                                                |      |                       |
|-------------|------------|---|--------|--------|-------|-----|------------------------------------------------------------------------------------------------|------|-----------------------|
| RSDT_0446   | CDS        | - | 601938 | 600478 | 1461  | 486 | glutamyl-tRNA(Gln) amidotransferase subunit A                                                  | gatA | 6.3.5.7               |
| RSDT_0447   | CDS        | - | 602316 | 602023 | 294   | 97  | glutamyl-tRNA(Gln) amidotransferase subunit C                                                  | gatC | 6.3.5.7               |
| RSDT_0448   | CDS        | - | 604430 | 602520 | 1911  | 636 | chaperone protein DnaK                                                                         | dnaK |                       |
| RSDT_0449   | CDS        | + | 604699 | 605700 | 1002  | 333 | methionine ABC transporter ATP-binding protein                                                 | metN |                       |
| RSDT_0450   | CDS        | + | 605669 | 606304 | 636   | 211 | methionine ABC transporter permease                                                            | metI |                       |
| RSDT_0451   | CDS        | + | 606326 | 607108 | 783   | 260 | methionine ABC transporter substrate-binding protein                                           | metQ |                       |
| RSDT_0452   | CDS        | - | 607814 | 607128 | 687   | 228 | metallophosphatase                                                                             |      |                       |
| RSDT_0453   | CDS        | + | 607890 | 608525 | 636   | 211 | 5-formyltetrahydrofolate cyclo-ligase                                                          | ygfA | 6.3.3.2               |
| RSDT_0454   | CDS        | + | 608714 | 608896 | 183   | 60  | conserved hypothetical protein                                                                 |      |                       |
| RSDT_0455   | CDS        | + | 608893 | 609603 | 711   | 236 | demethylmenaquinone methyltransferase                                                          | menG | 2.1.1.163             |
| RSDT_0456   | CDS        | + | 609615 | 610928 | 1314  | 437 | UDP-N-acetyl-D-galactosamine dehydrogenase                                                     | wbpO |                       |
| RSDT_0457   | CDS        | + | 611011 | 611730 | 720   | 239 | putative fualosine nucleosidase                                                                | mqnB | 3.2.2.26              |
| RSDT_0458   | CDS        | + | 611740 | 612705 | 966   | 321 | octaprenyl-diphosphate synthase                                                                | ispB | 2.5.1.90              |
| RSDT_0459   | CDS        | + | 612847 | 615846 | 3000  | 999 | phosphoribosylformylglycinamide synthase synthetase subunit                                    | purL | 6.3.5.3               |
| RSDT_0460   | CDS        | - | 617218 | 615869 | 1350  | 449 | UDP-N-acetylgalactosamine-undecaprenyl-phosphate N-acetylgalactosaminephosphotransferase       | wecP | 2.7.8.6<br>(2.7.8.40) |
| RSDT_0461   | CDS        | - | 618345 | 617215 | 1131  | 376 | N,N'-diacetylbacillosaminyl-diphospho-undecaprenol alpha-1,3-N-acetylgalactosaminyltransferase | pglA | 2.4.1.290             |
| RSDT_pg_088 | pseudogene | + | 618587 | 618718 | 132 x |     | pseudogene of rare lipoprotein A family protein                                                | rplA |                       |
| RSDT_0462   | CDS        | - | 619472 | 618837 | 636   | 211 | chaperone protein GrpE                                                                         | grpE |                       |
| RSDT_0463   | CDS        | + | 619792 | 620562 | 771   | 256 | Ni2+ ABC transporter Ni2+-binding protein NikK                                                 | nikK |                       |
| RSDT_0464   | CDS        | + | 620668 | 621273 | 606   | 201 | Ni2+ ABC transporter permease NikM                                                             | nikM |                       |
| RSDT_0465   | CDS        | + | 621300 | 621896 | 597   | 198 | Ni2+ ABC transporter small membrane-bound protein NikL                                         | nikL |                       |
| RSDT_0466   | CDS        | + | 621909 | 622667 | 759   | 252 | Ni2+ ABC transporter permease NikQ                                                             | nikQ |                       |
| RSDT_0467   | CDS        | + | 622660 | 623400 | 741   | 246 | Ni2+ ABC transporter ATP-binding protein NikO                                                  | nikO |                       |
| RSDT_0468   | CDS        | + | 624081 | 624347 | 267   | 88  | 30S ribosomal protein S20                                                                      | rpsT |                       |
| RSDT_0469   | CDS        | - | 625461 | 624466 | 996   | 331 | holliday junction DNA helicase RuvB                                                            | ruvB | 3.6.4.12              |

|              |            |   |        |        |       |                                                   |      |           |
|--------------|------------|---|--------|--------|-------|---------------------------------------------------|------|-----------|
| RSDT_0470    | CDS        | - | 626072 | 625461 | 612   | 203 holliday junction DNA helicase RuvA           | ruvA | 3.6.4.12  |
| RSDT_0471    | CDS        | - | 627134 | 626133 | 1002  | 333 molybdenum cofactor biosynthesis protein MoaA | moaA |           |
| RSDT_0472    | CDS        | + | 627203 | 627481 | 279   | 92 conserved hypothetical protein                 |      |           |
| RSDT_0473    | CDS        | - | 628047 | 627478 | 570   | 189 conserved hypothetical protein                |      |           |
| RSDT_0474    | CDS        | + | 628446 | 628811 | 366   | 121 conserved hypothetical protein                |      |           |
| RSDT_0475    | CDS        | + | 628820 | 630169 | 1350  | 449 tRNA-i(6)A37 methylthiotransferase MiaB       | miaB |           |
| RSDT_0476    | CDS        | + | 630310 | 631422 | 1113  | 370 uncharacterized glycosyltransferase           |      |           |
| RSDT_0477    | CDS        | - | 633122 | 631572 | 1551  | 516 conserved hypothetical protein                |      |           |
| RSDT_0478    | CDS        | + | 633316 | 633807 | 492   | 163 transcription elongation factor GreA          | greA |           |
| RSDT_0479    | CDS        | + | 633804 | 634916 | 1113  | 370 conserved hypothetical protein                |      |           |
| RSDT_0480    | CDS        | + | 634916 | 635737 | 822   | 273 D-Ala-D-Ala carboxypeptidase                  | dacC | 3.4.16.4  |
| RSDT_0481    | CDS        | - | 638922 | 635851 | 3072  | 1023 outer membrane autotransporter               |      |           |
| RSDT_0482    | CDS        | + | 639520 | 640284 | 765   | 254 glucose-1-phosphate cytidyltransferase        | rfbF | 2.7.7.33  |
| RSDT_0483    | CDS        | + | 640378 | 641490 | 1113  | 370 CDP-glucose 4,6-dehydratase                   | rfbG | 4.2.1.45  |
| RSDT_0484    | CDS        | + | 641487 | 642002 | 516   | 171 dTDP-4-dehydrorhamnose 3,5-epimerase          | rfbC | 5.1.3.13  |
| RSDT_0485    | CDS        | + | 642095 | 643027 | 933   | 310 homoserine O-succinyltransferase              | metA | 2.3.1.46  |
| RSDT_0486    | CDS        | + | 643072 | 643908 | 837   | 278 Fe-S cluster assembly protein NifU            | nifU |           |
| RSDT_0487    | CDS        | + | 643912 | 645066 | 1155  | 384 cysteine desulfurase NifS                     | nifS | 2.8.1.7   |
| RSDT_tRNA_22 | tRNA       | - | 645279 | 645204 | 76 xx | tRNA-Lys                                          |      |           |
| RSDT_0488    | CDS        | - | 645658 | 645512 | 147   | 48 High-molecular-weight cytochrome c subunit D   | hmcD |           |
| RSDT_0489    | CDS        | - | 646891 | 645677 | 1215  | 404 High-molecular-weight cytochrome c subunit C  | hmcC |           |
| RSDT_0490    | CDS        | - | 647983 | 646892 | 1092  | 363 High-molecular-weight cytochrome c subunit B  | hmcB |           |
| RSDT_0491    | CDS        | - | 648981 | 647980 | 1002  | 333 High-molecular-weight cytochrome c subunit A  | hmcA |           |
| RSDT_0492    | CDS        | + | 649508 | 650314 | 807   | 268 tRNA pseudouridine synthase A                 | truA | 5.4.99.12 |
| RSDT_0493    | CDS        | - | 651087 | 650296 | 792   | 263 Undecaprenyl-diphosphatase                    | uppP | 3.6.1.27  |
| RSDT_pg_089  | pseudogene | + | 651162 | 651365 | 204 x | pseudogene of conserved hypothetical prtotein     |      |           |
| RSDT_0494    | CDS        | - | 652915 | 651371 | 1545  | 514 methionyl-tRNA synthetase                     | metG | 6.1.1.10  |

|              |            |   |        |        |       |                                                          |      |           |
|--------------|------------|---|--------|--------|-------|----------------------------------------------------------|------|-----------|
| RSDT_0495    | CDS        | - | 653888 | 652938 | 951   | 316 conserved hypothetical protein                       |      |           |
| RSDT_0496    | CDS        | + | 654157 | 655389 | 1233  | 410 argininosuccinate synthase                           | argG | 6.3.4.5   |
| RSDT_0497    | CDS        | + | 655382 | 656827 | 1446  | 481 argininosuccinate lyase                              | argH | 4.3.2.1   |
| RSDT_0498    | CDS        | + | 656814 | 657689 | 876   | 291 conserved hypothetical protein                       |      |           |
| RSDT_0499    | CDS        | + | 657989 | 658192 | 204   | 67 30S ribosomal protein S21                             | rpsU |           |
| RSDT_0500    | CDS        | + | 658308 | 658760 | 453   | 150 conserved hypothetical protein                       |      |           |
| RSDT_pg_090  | pseudogene | + | 658784 | 659125 | 342 x | pseudogene of Smr family protein                         |      |           |
| RSDT_0501    | CDS        | + | 659166 | 660905 | 1740  | 579 DNA primase                                          | dnaG |           |
| RSDT_0502    | CDS        | + | 660898 | 662667 | 1770  | 589 RNA polymerase sigma factor RpoD                     | rpoD |           |
| RSDT_0503    | CDS        | + | 662778 | 663425 | 648   | 215 putative endonuclease                                |      |           |
| RSDT_tRNA_23 | tRNA       | + | 663546 | 663632 | 87 xx | tRNA-Leu                                                 |      |           |
| RSDT_0504    | CDS        | + | 664033 | 664410 | 378   | 125 conserved hypothetical protein                       |      |           |
| RSDT_0505    | CDS        | - | 665362 | 664430 | 933   | 310 conserved hypothetical protein                       |      |           |
| RSDT_0506    | CDS        | + | 665786 | 669349 | 3564  | 1187 putative FAD-dependent oxidoreductase               |      |           |
| RSDT_0507    | CDS        | - | 669777 | 669379 | 399   | 132 Peroxide-responsive repressor PerR                   | perR |           |
| RSDT_0508    | CDS        | - | 670726 | 669902 | 825   | 274 1-acyl-sn-glycerol-3-phosphate acyltransferase       | plsC | 2.3.1.51  |
| RSDT_0509    | CDS        | - | 671952 | 670723 | 1230  | 409 replication-associated recombination protein A       | rarA |           |
| RSDT_0510    | CDS        | - | 672707 | 671949 | 759   | 252 16S rRNA (uracil1498-N3)-methyltransferase           | rsmE | 2.1.1.193 |
| RSDT_0511    | CDS        | - | 674434 | 672725 | 1710  | 569 conserved hypothetical protein                       |      |           |
| RSDT_pg_091  | pseudogene | + | 674978 | 675651 | 674 x | pseudogene of conserved hypothetical protein             |      |           |
| RSDT_0512    | CDS        | - | 677662 | 675722 | 1941  | 646 1-deoxy-D-xylulose-5-phosphate synthase              | dxs  | 2.2.1.7   |
| RSDT_0513    | CDS        | - | 678558 | 677662 | 897   | 298 farnesyl-diphosphate synthase                        | ispA | 2.5.1.10  |
| RSDT_0514    | CDS        | - | 678806 | 678561 | 246   | 81 exodeoxyribonuclease VII small subunit                | xseB | 3.1.11.6  |
| RSDT_0515    | CDS        | - | 680314 | 678851 | 1464  | 487 exodeoxyribonuclease VII large subunit               | xseA | 3.1.11.6  |
| RSDT_0516    | CDS        | - | 682091 | 680355 | 1737  | 578 prolyl-tRNA synthetase                               | proS | 6.1.1.15  |
| RSDT_0517    | CDS        | - | 683166 | 682081 | 1086  | 361 4-hydroxy-3-methylbut-2-en-1-yl diphosphate synthase | ispG | 1.17.7.1  |
| RSDT_0518    | CDS        | + | 683349 | 684449 | 1101  | 366 ribosome-binding ATPase YchF                         | ychF |           |



|             |            |   |        |        |      |     |                                                                           |               |                        |
|-------------|------------|---|--------|--------|------|-----|---------------------------------------------------------------------------|---------------|------------------------|
| RSDT_0519   | CDS        | - | 685241 | 684474 | 768  | 255 | tryptophan synthase subunit alpha                                         | trpA          | 4.2.1.20               |
| RSDT_0520   | CDS        | - | 686418 | 685228 | 1191 | 396 | tryptophan synthase subunit beta                                          | trpB          | 4.2.1.20               |
| RSDT_0521   | CDS        | - | 687050 | 686415 | 636  | 211 | N-(5'-phosphoribosyl)anthranilate isomerase                               | trpF          | 5.3.1.24               |
| RSDT_0522   | CDS        | - | 687876 | 687040 | 837  | 278 | indole-3-glycerol phosphate synthase                                      | trpC          | 4.1.1.48               |
| RSDT_0523   | CDS        | - | 689458 | 687866 | 1593 | 530 | anthranilate synthase subunit beta/anthranilate phosphoribosyltransferase | trpGD         | 4.1.3.27/<br>2.4.2.18  |
| RSDT_0524   | CDS        | - | 690893 | 689439 | 1455 | 484 | anthranilate synthase subunit alpha                                       | trpE          | 4.1.3.27               |
| RSDT_0525   | CDS        | - | 692187 | 691378 | 810  | 269 | exodeoxyribonuclease III                                                  | xthA          | 3.1.11.2               |
| RSDT_0526   | CDS        | - | 692654 | 692235 | 420  | 139 | conserved hypothetical protein                                            |               |                        |
| RSDT_0527   | CDS        | - | 693199 | 692651 | 549  | 182 | conserved hypothetical protein                                            |               |                        |
| RSDT_0528   | CDS        | - | 693658 | 693209 | 450  | 149 | conserved hypothetical protein                                            |               |                        |
| RSDT_0529   | CDS        | + | 694276 | 695775 | 1500 | 499 | M17 family cytosolic leucyl aminopeptidase                                | pepA          | 3.4.11.1               |
| RSDT_0530   | CDS        | + | 695836 | 697356 | 1521 | 506 | uroporphyrinogen III methyltransferase / synthase                         | hemD/c<br>obA | 4.2.1.75/<br>2.1.1.107 |
| RSDT_0531   | CDS        | + | 697450 | 698124 | 675  | 224 | phosphoribosylglycinamide formyltransferase                               | purN          | 2.1.2.2                |
| RSDT_0532   | CDS        | - | 699603 | 698224 | 1380 | 459 | NtrC/AtoC/ZraR-like transcriptional regulator                             |               |                        |
| RSDT_0533   | CDS        | - | 700168 | 699926 | 243  | 80  | conserved hypothetical protein                                            |               |                        |
| RSDT_0534   | CDS        | - | 701768 | 700245 | 1524 | 507 | phosphoglyceromutase                                                      | gpmI          | 5.4.2.1                |
| RSDT_0535   | CDS        | - | 702133 | 701765 | 369  | 122 | putative ribosome-silencing factor RsfS                                   | rsfS          |                        |
| RSDT_0536   | CDS        | + | 702581 | 703879 | 1299 | 432 | diaminopimelate decarboxylase                                             | lysA          | 4.1.1.20               |
| RSDT_0537   | CDS        | + | 703866 | 705251 | 1386 | 461 | MATE family efflux pump                                                   |               |                        |
| RSDT_0538   | CDS        | - | 705660 | 705238 | 423  | 140 | FKBP-type peptidyl-prolyl cis-trans isomerase SlyD                        | slyD          | 5.2.1.8                |
| RSDT_0539   | CDS        | - | 706812 | 705697 | 1116 | 371 | cyclic dehypoxanthine futasine synthase                                   | mqnC          | 1.21.99.2              |
| RSDT_0540   | CDS        | - | 707948 | 706809 | 1140 | 379 | aminodeoxyfutasine synthase                                               | mqnE          | 2.5.1.120              |
| RSDT_0541   | CDS        | + | 708035 | 708880 | 846  | 281 | 1,4-dihydroxy-6-naphtoate synthase                                        | mqnD          | 1.14.-.-               |
| RSDT_pg_092 | pseudogene | + | 709230 | 709627 | 398  | x   | pseudogene of transposase                                                 |               |                        |
| RSDT_0542   | CDS        | + | 709725 | 711137 | 1413 | 470 | aspartate ammonia-lyase                                                   | aspA          | 4.3.1.1                |
| RSDT_0543   | CDS        | + | 711137 | 712441 | 1305 | 434 | anaerobic C4-dicarboxylate transporter DcuA                               | dcuA          |                        |

|              |      |   |        |        |      |      |                                                                     |       |                      |
|--------------|------|---|--------|--------|------|------|---------------------------------------------------------------------|-------|----------------------|
| RSDT_0544    | CDS  | - | 714827 | 712479 | 2349 | 782  | primosomal protein N'                                               | priA  | 3.6.4.-              |
| RSDT_0545    | CDS  | + | 714913 | 715932 | 1020 | 339  | ornithine carbamoyltransferase                                      | argF1 | 2.1.3.3              |
| RSDT_0546    | CDS  | + | 716229 | 717185 | 957  | 318  | aspartate carbamoyltransferase                                      | pyrB  | 2.1.3.2              |
| RSDT_0547    | CDS  | + | 717230 | 718492 | 1263 | 420  | dihydroorotase                                                      | pyrC  | 3.5.2.3              |
| RSDT_0548    | CDS  | - | 719722 | 718538 | 1185 | 394  | aspartate aminotransferase                                          | aspB  | 2.6.1.1              |
| RSDT_0549    | CDS  | - | 721069 | 719750 | 1320 | 439  | homoserine dehydrogenase                                            | hom   | 1.1.1.3              |
| RSDT_0550    | CDS  | - | 722297 | 721122 | 1176 | 391  | glutamate-pyruvate aminotransferase                                 | alaC  | 2.6.1.-              |
| RSDT_0551    | CDS  | - | 725684 | 722613 | 3072 | 1023 | outer membrane autotransporter                                      |       |                      |
| RSDT_tRNA_24 | tRNA | + | 726204 | 726278 | 75   | xx   | tRNA-Gly                                                            |       |                      |
| RSDT_tRNA_25 | tRNA | + | 726297 | 726370 | 74   | xx   | tRNA-Cys                                                            |       |                      |
| RSDT_tRNA_26 | tRNA | + | 726404 | 726475 | 72   | xx   | tRNA-Gly                                                            |       |                      |
| RSDT_0552    | CDS  | + | 726731 | 727225 | 495  | 164  | hydrogenase maturation protease                                     | hyaD  | 3.4.23.-             |
| RSDT_0553    | CDS  | - | 728634 | 727297 | 1338 | 445  | UDP-glucose 6-dehydrogenase                                         | ugd   | 1.1.1.22             |
| RSDT_0554    | CDS  | - | 729342 | 728752 | 591  | 196  | conserved hypothetical protein                                      |       |                      |
| RSDT_0555    | CDS  | + | 729535 | 730806 | 1272 | 423  | seryl-tRNA synthase                                                 | serS  | 6.1.1.11             |
| RSDT_0556    | CDS  | - | 732032 | 730857 | 1176 | 391  | branched-chain amino acid ABC transporter substrate-binding protein | livK  |                      |
| RSDT_rRNA_1  | rRNA | - | 732312 | 732200 | 113  | xx   | 5S rRNA                                                             |       |                      |
| RSDT_rRNA_2  | rRNA | - | 735283 | 732357 | 2927 | xx   | 23S rRNA                                                            |       |                      |
| RSDT_tRNA_27 | tRNA | - | 735421 | 735346 | 76   | xx   | tRNA-Ala                                                            |       |                      |
| RSDT_tRNA_28 | tRNA | - | 735503 | 735427 | 77   | xx   | tRNA-Ile                                                            |       |                      |
| RSDT_rRNA_3  | rRNA | - | 737127 | 735579 | 1549 | xx   | 16S rRNA                                                            |       |                      |
| RSDT_0557    | CDS  | + | 737627 | 739654 | 2028 | 675  | putative K <sup>+</sup> /H <sup>+</sup> antiporter                  | kefB  |                      |
| RSDT_0558    | CDS  | + | 739686 | 743171 | 3486 | 1161 | DNA polymerase III subunit alpha                                    | dnaE  | 2.7.7.7              |
| RSDT_0559    | CDS  | + | 743191 | 743358 | 168  | 55   | conserved hypothetical protein                                      |       |                      |
| RSDT_0560    | CDS  | + | 743358 | 743801 | 444  | 147  | 6-pyruvoyltetrahydropterin/6-carboxytetrahydropterin synthase       | queD  | 4.2.3.12<br>4.1.2.50 |
| RSDT_0561    | CDS  | - | 744262 | 743834 | 429  | 142  | conserved hypothetical protein                                      |       |                      |

|             |            |   |        |        |       |                                                              |       |          |
|-------------|------------|---|--------|--------|-------|--------------------------------------------------------------|-------|----------|
| RSDT_0562   | CDS        | + | 744471 | 745664 | 1194  | 397 aspartate aminotransferase                               | yhdR  | 2.6.1.1  |
| RSDT_0563   | CDS        | + | 746094 | 747032 | 939   | 312 shikimate dehydrogenase                                  | aroE  | 1.1.1.25 |
| RSDT_0564   | CDS        | + | 747020 | 747469 | 450   | 149 3-dehydroquinate dehydratase                             | aroQ  | 4.2.1.10 |
| RSDT_0565   | CDS        | + | 747700 | 748284 | 585   | 194 heterodisulfide reductase subunit C                      | hdrC  | 1.8.98.1 |
| RSDT_0566   | CDS        | + | 748281 | 749165 | 885   | 294 heterodisulfide reductase subunit B                      | hdrB  | 1.8.98.1 |
| RSDT_0567   | CDS        | + | 749162 | 751123 | 1962  | 653 heterodisulfide reductase subunit A                      | hdrA  | 1.8.98.1 |
| RSDT_0568   | CDS        | + | 751111 | 752559 | 1449  | 482 NAD(P)H dehydrogenase subunit CD                         | flxCD |          |
| RSDT_0569   | CDS        | + | 752556 | 753617 | 1062  | 353 NAD(P)H dehydrogenase subunit B                          | flxB  |          |
| RSDT_0570   | CDS        | + | 753661 | 754575 | 915   | 304 NAD(P)H dehydrogenase subunit A                          | flxA  |          |
| RSDT_0571   | CDS        | + | 754592 | 755110 | 519   | 172 conserved hypothetical protein                           |       |          |
| RSDT_0572   | CDS        | - | 756010 | 755156 | 855   | 284 Sel1 family tetratricopeptide repeat protein             |       |          |
| RSDT_0573   | CDS        | - | 756601 | 756212 | 390   | 129 conserved hypothetical protein                           |       |          |
| RSDT_0574   | CDS        | - | 758895 | 756733 | 2163  | 720 (p)ppGpp synthase                                        | relA  | 2.7.6.5  |
| RSDT_pg_093 | pseudogene | - | 759388 | 759195 | 194 x | pseudogene of transposase                                    |       |          |
| RSDT_0575   | CDS        | - | 760002 | 759442 | 561   | 186 ribosome recycling factor                                | fr    |          |
| RSDT_0576   | CDS        | - | 760740 | 760024 | 717   | 238 uridylate kinase                                         | pyrH  | 2.7.4.22 |
| RSDT_pg_094 | pseudogene | + | 761121 | 761282 | 162 x | pseudogene of transposase                                    |       |          |
| RSDT_0577   | CDS        | - | 763206 | 761290 | 1917  | 638 arginine decarboxylase                                   | speA  | 4.1.1.19 |
| RSDT_pg_095 | pseudogene | + | 763415 | 763736 | 322 x | pseudogene of transposase                                    |       |          |
| RSDT_0578   | CDS        | - | 764115 | 763879 | 237   | 78 dissimilatory sulfite reductase D                         | dsrD  |          |
| RSDT_0579   | CDS        | - | 765318 | 764173 | 1146  | 381 dissimilatory sulfite reductase subunit beta             | dsrB  | 1.8.99.3 |
| RSDT_0580   | CDS        | - | 766650 | 765337 | 1314  | 437 dissimilatory sulfite reductase subunit alpha            | dsrA  | 1.8.99.3 |
| RSDT_0581   | CDS        | - | 767595 | 766948 | 648   | 215 conserved hypothetical protein                           |       |          |
| RSDT_0582   | CDS        | - | 768608 | 767604 | 1005  | 334 low-affinity inorganic phosphate transporter             | pit   |          |
| RSDT_0583   | CDS        | - | 769230 | 768601 | 630   | 209 putative Pit accesorry protein                           | pitX  |          |
| RSDT_0584   | CDS        | + | 769832 | 771163 | 1332  | 443 histidinol dehydrogenase                                 | hisD  | 1.1.1.23 |
| RSDT_0585   | CDS        | + | 771166 | 772128 | 963   | 320 phosphoribosylaminoimidazole-succinocarboxamide synthase | purC  | 6.3.2.6  |

|              |            |   |        |        |      |     |                                                                                        |      |          |
|--------------|------------|---|--------|--------|------|-----|----------------------------------------------------------------------------------------|------|----------|
| RSDT_0586    | CDS        | + | 772079 | 772843 | 765  | 254 | NADH-dependent enoyl-[acyl-carrier-protein] reductase                                  | fabI | 1.3.1.9  |
| RSDT_0587    | CDS        | + | 772852 | 772998 | 147  | 48  | conserved hypothetical protein                                                         |      |          |
| RSDT_tRNA_29 | tRNA       | + | 773289 | 773380 | 92   | xx  | tRNA-Ser                                                                               |      |          |
| RSDT_pg_096  | pseudogene | + | 773556 | 774092 | 537  | x   | pseudogene of phage integrase                                                          |      |          |
| RSDT_pg_097  | pseudogene | - | 774587 | 774093 | 495  | x   | pseudogene of conserved hypothetical protein                                           |      |          |
| RSDT_0588    | CDS        | - | 775423 | 774863 | 561  | 186 | putative NAD(P)H-dependent FMN reductase                                               |      |          |
| RSDT_0589    | CDS        | + | 775660 | 776172 | 513  | 170 | putative NAD(P)H-dependent FMN reductase                                               |      | 1.5.1.39 |
| RSDT_0590    | CDS        | + | 776224 | 777015 | 792  | 263 | putative 2-dehydro-3-deoxyglucarate aldolase                                           | garL | 4.1.2.20 |
| RSDT_0591    | CDS        | + | 777019 | 777933 | 915  | 304 | NAD-dependent UDP-glucose 4-epimerase                                                  | galE | 5.1.3.2  |
| RSDT_0592    | CDS        | + | 778073 | 778843 | 771  | 256 | 3-deoxy-manno-octulosonate cytidyltransferase                                          | kdsB | 2.7.7.38 |
| RSDT_0593    | CDS        | + | 778852 | 779451 | 600  | 199 | putative LPS biosynthesis O-acetyl transferase WbbJ                                    | wbbJ |          |
| RSDT_0594    | CDS        | + | 779460 | 780095 | 636  | 211 | uncharacterized phosphatase                                                            |      |          |
| RSDT_0595    | CDS        | + | 780095 | 781063 | 969  | 322 | conserved hypothetical protein                                                         |      |          |
| RSDT_pg_098  | pseudogene | + | 781642 | 782269 | 628  | x   | pseudogene of carbon starvation protein CstA                                           | cstA |          |
| RSDT_pg_099  | pseudogene | - | 783442 | 782381 | 1062 | x   | pseudogene of putative type I DNA restriction-modification system endonuclease subunit | hsdR |          |
| RSDT_0596    | CDS        | - | 784816 | 783773 | 1044 | 347 | molybdopterin binding domain-containing protein                                        |      |          |
| RSDT_0597    | CDS        | - | 787192 | 785324 | 1869 | 622 | excinuclease ABC subunit C                                                             | uvrC |          |
| RSDT_0598    | CDS        | - | 787512 | 787228 | 285  | 94  | conserved hypothetical protein                                                         |      |          |
| RSDT_pg_100  | pseudogene | + | 787858 | 788616 | 759  | x   | pseudogene of conserved hypothetical protein                                           |      |          |
| RSDT_0599    | CDS        | + | 788929 | 789189 | 261  | 86  | uncharacterized transcriptional regulator                                              |      |          |
| RSDT_0600    | CDS        | + | 789179 | 790276 | 1098 | 365 | HipA-like protein kinase                                                               |      | 2.7.11.1 |
| RSDT_pg_101  | pseudogene | + | 790425 | 790780 | 356  | x   | pseudogene of conserved hypothetical protein                                           |      |          |
| RSDT_pg_102  | pseudogene | + | 791348 | 791512 | 165  | x   | pseudogene of DNA restriction-modification system cytosine-specific methylase subunit  | dcm  | 2.1.1.37 |
| RSDT_pg_103  | pseudogene | - | 792430 | 791516 | 915  | x   | pseudogene of DNA restriction-modification system endonuclease subunit                 |      |          |
| RSDT_0601    | CDS        | - | 792852 | 792430 | 423  | 140 | DNA mismatch repair endonuclease                                                       | vsr  |          |
| RSDT_0602    | CDS        | - | 793614 | 793405 | 210  | 69  | AlpA-like phage transcriptional regulator                                              |      |          |

|              |            |   |        |        |      |     |                                                                                              |       |                       |
|--------------|------------|---|--------|--------|------|-----|----------------------------------------------------------------------------------------------|-------|-----------------------|
| RSDT_pg_104  | pseudogene | - | 794175 | 793801 | 375  | x   | pseudogene of integrase                                                                      |       |                       |
| RSDT_tRNA_30 | tRNA       | - | 794492 | 794416 | 77   | xx  | tRNA-Glu                                                                                     |       |                       |
| RSDT_0603    | CDS        | + | 794675 | 795415 | 741  | 246 | rare lipoprotein A                                                                           | rlpA2 |                       |
| RSDT_tRNA_31 | tRNA       | - | 795716 | 795640 | 77   | xx  | tRNA-Glu                                                                                     |       |                       |
| RSDT_tRNA_32 | tRNA       | - | 795796 | 795722 | 75   | xx  | tRNA-Gln                                                                                     |       |                       |
| RSDT_0604    | CDS        | - | 796933 | 796094 | 840  | 279 | hydroxymethylbutenyl pyrophosphate reductase                                                 | ispH  | 1.17.1.2              |
| RSDT_0605    | CDS        | - | 797960 | 796914 | 1047 | 348 | tRNA-dihydrouridine synthase                                                                 | dusB  |                       |
| RSDT_0606    | CDS        | - | 799456 | 798143 | 1314 | 437 | ATP-dependent protease ATPase/chaperone subunit HslU                                         | hslU  |                       |
| RSDT_pg_105  | pseudogene | + | 799593 | 799792 | 200  | x   | pseudogene of conserved hypothetical protein                                                 |       |                       |
| RSDT_0607    | CDS        | - | 800762 | 799845 | 918  | 305 | inorganic pyrophosphatase                                                                    | ppaC  | 3.6.1.1               |
| RSDT_0608    | CDS        | + | 800962 | 802644 | 1683 | 560 | uncharacterized ABC transporter ATP-binding protein                                          |       |                       |
| RSDT_0609    | CDS        | - | 803152 | 802706 | 447  | 148 | putative PTS sugar transporter subunit IIA                                                   |       |                       |
| RSDT_0610    | CDS        | - | 804094 | 803177 | 918  | 305 | uncharacterized ATPase                                                                       |       |                       |
| RSDT_0611    | CDS        | - | 804643 | 804104 | 540  | 179 | ribosomal subunit interface protein                                                          | yhbH  |                       |
| RSDT_0612    | CDS        | - | 806099 | 804672 | 1428 | 475 | RNA polymerase sigma 54 subunit RpoN                                                         | rpoN  |                       |
| RSDT_0613    | CDS        | - | 807679 | 806240 | 1440 | 479 | glutamyl-tRNA(Gln) amidotransferase subunit B                                                | gatB  | 6.3.5.6/<br>6.3.5.7   |
| RSDT_0614    | CDS        | - | 808626 | 807754 | 873  | 290 | NAD+ kinase                                                                                  | ppnK  | 2.7.1.23              |
| RSDT_0615    | CDS        | + | 809021 | 809266 | 246  | 81  | FmdB family regulatory protein                                                               |       |                       |
| RSDT_0616    | CDS        | + | 809320 | 810246 | 927  | 308 | porphobilinogen deaminase                                                                    | hemC  | 2.5.1.61              |
| RSDT_0617    | CDS        | + | 810256 | 812715 | 2460 | 819 | ATP-dependent protease La homolog                                                            |       |                       |
| RSDT_0618    | CDS        | - | 813298 | 812768 | 531  | 176 | methylated-DNA-[protein]-cysteine S-methyltransferase                                        | ogt   | 2.1.1.63              |
| RSDT_0619    | CDS        | - | 815975 | 813285 | 2691 | 896 | tRNA nucleotidyltransferase/poly(A) polymerase                                               |       | 2.7.7.72/<br>2.7.7.19 |
| RSDT_0620    | CDS        | - | 816904 | 815984 | 921  | 306 | site-specific tyrosine recombinase XerD                                                      | xerD  |                       |
| RSDT_pg_106  | pseudogene | - | 817641 | 816928 | 714  | x   | pseudogene of DNA restriction-modification system adenine-specific methyltransferase subunit |       |                       |
| RSDT_pg_107  | pseudogene | - | 820509 | 817622 | 2888 | x   | pseudogene of putative DNA restriction-modification system endonuclease subunit              |       |                       |
| RSDT_0621    | CDS        | + | 820987 | 821478 | 492  | 163 | putative Fe2+/Zn2+ uptake regulator                                                          | fur   |                       |

|             |            |   |        |        |      |     |                                                                               |       |                      |
|-------------|------------|---|--------|--------|------|-----|-------------------------------------------------------------------------------|-------|----------------------|
| RSDT_0622   | CDS        | + | 821501 | 821950 | 450  | 149 | MOSC domain-containing molybdenum cofactor biosynthesis protein               |       |                      |
| RSDT_0623   | CDS        | - | 824973 | 822010 | 2964 | 987 | excinuclease ABC subunit A                                                    | uvrA  |                      |
| RSDT_0624   | CDS        | + | 825124 | 825477 | 354  | 117 | hydrogenase nickel incorporation protein HypA                                 | hypA2 |                      |
| RSDT_0625   | CDS        | + | 825543 | 826202 | 660  | 219 | hydrogenase nickel incorporation protein HypB                                 | hypB  |                      |
| RSDT_0626   | CDS        | + | 826199 | 826858 | 660  | 219 | conserved hypothetical protein                                                |       |                      |
| RSDT_0627   | CDS        | + | 826902 | 828323 | 1422 | 473 | mannose-1-phosphate guanylyltransferase/ mannose-6-phosphate isomerase        | manC  | 2.7.7.13/<br>5.3.1.8 |
| RSDT_0628   | CDS        | - | 829356 | 828340 | 1017 | 338 | glyceraldehyde-3-phosphate dehydrogenase                                      | gap1  | 1.2.1.12             |
| RSDT_0629   | CDS        | - | 830537 | 829431 | 1107 | 368 | rod shape-determining protein RodA                                            | mrdB  |                      |
| RSDT_0630   | CDS        | - | 832470 | 830575 | 1896 | 631 | peptidoglycan glycosyltransferase MrdA                                        | mrdA  |                      |
| RSDT_0631   | CDS        | - | 832927 | 832451 | 477  | 158 | conserved hypothetical protein                                                |       |                      |
| RSDT_0632   | CDS        | - | 833820 | 832924 | 897  | 298 | rod shape-determining protein MreC                                            | mreC  |                      |
| RSDT_0633   | CDS        | - | 834860 | 833820 | 1041 | 346 | rod shape-determining protein MreB                                            | mreB  |                      |
| RSDT_pg_108 | pseudogene | + | 834959 | 835080 | 122  | x   | pseudogene of transposase                                                     |       |                      |
| RSDT_0634   | CDS        | + | 835135 | 835920 | 786  | 261 | uncharacterized metal-dependent phosphohydrolases                             |       |                      |
| RSDT_0635   | CDS        | - | 836713 | 835949 | 765  | 254 | 5'-nucleotidase                                                               | surE  | 3.1.3.5              |
| RSDT_0636   | CDS        | + | 836773 | 837804 | 1032 | 343 | 3'-5' exoribonuclease                                                         | yhaM  | 3.1.-.-              |
| RSDT_0637   | CDS        | + | 837780 | 838433 | 654  | 217 | thymidylate kinase                                                            | tmk   | 2.7.4.9              |
| RSDT_0638   | CDS        | + | 838492 | 839823 | 1332 | 443 | histone deacetylase-like amidohydrolase                                       | hdaH  |                      |
| RSDT_0639   | CDS        | + | 839823 | 841025 | 1203 | 400 | carboxynorspermidine synthase                                                 |       | 1.5.1.43             |
| RSDT_0640   | CDS        | + | 841029 | 842243 | 1215 | 404 | carboxynorspermidine/carboxyspermidine decarboxylase                          | nspC  | 4.1.1.96             |
| RSDT_pg_109 | pseudogene | - | 843257 | 842274 | 984  | x   | pseudogene of polysaccharide deacetylase                                      |       |                      |
| RSDT_pg_110 | pseudogene | - | 843737 | 843473 | 265  | x   | pseudogene of conserved hypothetical protein                                  |       |                      |
| RSDT_pg_111 | pseudogene | - | 843997 | 843740 | 258  | x   | pseudogene of conserved hypothetical protein                                  |       |                      |
| RSDT_0641   | CDS        | - | 845032 | 844121 | 912  | 303 | conserved hypothetical protein                                                |       |                      |
| RSDT_pg_112 | pseudogene | - | 846999 | 845091 | 1909 | x   | pseudogene of type I DNA restriction-modification system endonuclease subunit | hsdR  | 3.1.21.3             |
| RSDT_pg_113 | pseudogene | - | 847494 | 847208 | 287  | x   | pseudogene of phage integrase                                                 |       |                      |

|              |            |   |        |        |      |     |                                                                     |       |           |
|--------------|------------|---|--------|--------|------|-----|---------------------------------------------------------------------|-------|-----------|
| RSDT_tRNA_33 | tRNA       | - | 847773 | 847687 | 87   | xx  | tRNA-Leu                                                            |       |           |
| RSDT_0642    | CDS        | - | 848750 | 848031 | 720  | 239 | uncharacterized methyltransferase                                   |       |           |
| RSDT_tRNA_34 | tRNA       | + | 849438 | 849514 | 77   | xx  | tRNA-Met                                                            |       |           |
| RSDT_pg_114  | pseudogene | + | 850103 | 850304 | 202  | x   | pseudogene fo signal receiver protein                               |       |           |
| RSDT_0643    | CDS        | + | 850393 | 851193 | 801  | 266 | putative protein disulfide oxidoreductase                           |       |           |
| RSDT_0644    | CDS        | - | 851980 | 851378 | 603  | 200 | DNA-3-methyladenine glycosylase 1                                   | tag   | 3.2.2.20  |
| RSDT_tRNA_35 | tRNA       | - | 853086 | 853010 | 77   | xx  | tRNA-Arg                                                            |       |           |
| RSDT_0645    | CDS        | + | 853505 | 854368 | 864  | 287 | uncharacterized metal-dependent phosphoesterase                     |       |           |
| RSDT_0646    | CDS        | - | 855701 | 854382 | 1320 | 439 | O-antigen ligase                                                    | rfaL  |           |
| RSDT_pg_115  | pseudogene | - | 855925 | 855758 | 168  | x   | pseudogene of conserved hypothetical protein                        |       |           |
| RSDT_0647    | CDS        | - | 857007 | 856114 | 894  | 297 | ATP phosphoribosyltransferase                                       | hisG  | 2.4.2.17  |
| RSDT_0648    | CDS        | - | 857429 | 857034 | 396  | 131 | phosphoribosyl-AMP cyclohydrolase                                   | hisI  | 3.5.4.19  |
| RSDT_0649    | CDS        | + | 857744 | 858367 | 624  | 207 | dITP/XTP pyrophosphatase                                            | rdgB  | 3.6.1.19  |
| RSDT_0650    | CDS        | - | 859206 | 858550 | 657  | 218 | puative phosphoglycolate phosphatase                                | gph   | 3.1.3.18  |
| RSDT_0651    | CDS        | - | 859856 | 859221 | 636  | 211 | conserved hypothetical protein                                      |       |           |
| RSDT_pg_116  | pseudogene | + | 860172 | 860386 | 215  | x   | pseudogene of transposase                                           |       |           |
| RSDT_0652    | CDS        | + | 860631 | 862889 | 2259 | 752 | DNA topoisomerase I                                                 | topA  | 5.99.1.2  |
| RSDT_0653    | CDS        | - | 864055 | 863192 | 864  | 287 | translation elongation factor Ts                                    | tsf   |           |
| RSDT_0654    | CDS        | - | 864929 | 864108 | 822  | 273 | 30S ribosomal protein S2                                            | rpsB  |           |
| RSDT_0655    | CDS        | - | 865945 | 865121 | 825  | 274 | 3-methyl-2-oxobutanoate hydroxymethyltransferase                    | panB  | 2.1.2.11  |
| RSDT_0656    | CDS        | - | 866814 | 865942 | 873  | 290 | agmatinase                                                          | speB  | 3.5.3.11  |
| RSDT_0657    | CDS        | + | 867317 | 868033 | 717  | 238 | endonuclease III                                                    | nth   | 4.2.99.18 |
| RSDT_0658    | CDS        | - | 869566 | 868379 | 1188 | 395 | bifunctional ornithine acetyltransferase/N-acetylglutamate synthase | argJ  | 2.3.1.1   |
| RSDT_0659    | CDS        | - | 871748 | 869670 | 2079 | 692 | translation elongation factor G                                     | fusA3 |           |
| RSDT_0660    | CDS        | - | 872357 | 871887 | 471  | 156 | 30S ribosomal protein S7                                            | rpsG  |           |
| RSDT_0661    | CDS        | - | 872884 | 872513 | 372  | 123 | 30S ribosomal protein S12                                           | rpsL  |           |
| RSDT_0662    | CDS        | + | 873237 | 873764 | 528  | 175 | conserved hypothetical protein                                      |       |           |

|              |            |   |        |        |      |      |                                                                                                         |      |                         |
|--------------|------------|---|--------|--------|------|------|---------------------------------------------------------------------------------------------------------|------|-------------------------|
| RSDT_pg_117  | pseudogene | - | 874079 | 873806 | 274  | x    | pseudogene of RelB family antitoxin                                                                     |      |                         |
| RSDT_0663    | CDS        | - | 874523 | 874032 | 492  | 163  | conserved hypothetical protein                                                                          |      |                         |
| RSDT_pg_118  | pseudogene | - | 875215 | 874611 | 605  | x    | pseudogene of amino acid efflux pump                                                                    |      |                         |
| RSDT_0664    | CDS        | - | 875496 | 875209 | 288  | 95   | putative endonuclease                                                                                   |      |                         |
| RSDT_0665    | CDS        | - | 877257 | 875539 | 1719 | 572  | single-stranded-DNA-specific exonuclease RecJ                                                           | recJ |                         |
| RSDT_0666    | CDS        | - | 878214 | 877531 | 684  | 227  | orotidine 5'-phosphate decarboxylase                                                                    | pyrF | 4.1.1.23                |
| RSDT_0667    | CDS        | - | 878847 | 878239 | 609  | 202  | guanylate kinase                                                                                        | gmk  | 2.7.4.8                 |
| RSDT_0668    | CDS        | - | 879169 | 878837 | 333  | 110  | conserved hypothetical protein                                                                          |      |                         |
| RSDT_0669    | CDS        | - | 880131 | 879253 | 879  | 292  | conserved hypothetical protein                                                                          |      |                         |
| RSDT_0670    | CDS        | - | 880555 | 880295 | 261  | 86   | FmdB family regulatory protein                                                                          |      |                         |
| RSDT_0671    | CDS        | - | 882280 | 880640 | 1641 | 546  | glutamine-dependent NAD <sup>+</sup> synthetase                                                         | nadE | 6.3.5.1                 |
| RSDT_rRNA_4  | rRNA       | - | 882575 | 882463 | 113  | xx   | 5S rRNA                                                                                                 |      |                         |
| RSDT_rRNA_5  | rRNA       | - | 885546 | 882620 | 2927 | xx   | 23S rRNA                                                                                                |      |                         |
| RSDT_tRNA_36 | tRNA       | - | 885684 | 885609 | 76   | xx   | tRNA-Ala                                                                                                |      |                         |
| RSDT_tRNA_37 | tRNA       | - | 885766 | 885690 | 77   | xx   | tRNA-Ile                                                                                                |      |                         |
| RSDT_rRNA_6  | rRNA       | - | 887390 | 885842 | 1549 | xx   | 16S rRNA                                                                                                |      |                         |
| RSDT_0672    | CDS        | - | 889358 | 887799 | 1560 | 519  | ribonuclease Y                                                                                          | my   | 3.1.-.-                 |
| RSDT_0673    | CDS        | + | 889386 | 889793 | 408  | 135  | hypothetical protein                                                                                    |      |                         |
| RSDT_0674    | CDS        | - | 890019 | 889756 | 264  | 87   | conserved hypothetical protein                                                                          |      |                         |
| RSDT_0675    | CDS        | - | 890271 | 890026 | 246  | 81   | conserved hypothetical protein                                                                          |      |                         |
| RSDT_0676    | CDS        | - | 891772 | 890417 | 1356 | 451  | bifunctional UDP-N-acetylglucosamine pyrophosphorylase /<br>Glucosamine-1-phosphate N-acetyltransferase | glmU | 2.7.7.23 /<br>2.3.1.157 |
| RSDT_0677    | CDS        | - | 894506 | 891906 | 2601 | 866  | ATP-dependent chaperone protein ClpB                                                                    | clpB |                         |
| RSDT_0678    | CDS        | - | 895465 | 894521 | 945  | 314  | curved DNA-binding protein                                                                              | cbpA |                         |
| RSDT_pg_119  | pseudogene | + | 895906 | 896216 | 311  | x    | pseudogene of conserved hypothetical protein                                                            |      |                         |
| RSDT_0679    | CDS        | + | 896619 | 897794 | 1176 | 391  | multidrug efflux pump subunit MdtA                                                                      | mdtA |                         |
| RSDT_0680    | CDS        | + | 897791 | 900892 | 3102 | 1033 | multidrug efflux pump subunit MdtB                                                                      | mdtB |                         |
| RSDT_0681    | CDS        | + | 900885 | 904127 | 3243 | 1080 | multidrug efflux pump subunit MdtC                                                                      | mdtC |                         |



|              |            |   |        |        |        |                                                                                             |               |                      |
|--------------|------------|---|--------|--------|--------|---------------------------------------------------------------------------------------------|---------------|----------------------|
| RSDT_0682    | CDS        | + | 904124 | 904786 | 663    | 220 FAD-dependent thymidylate synthase                                                      | thyX          | 2.1.1.148            |
| RSDT_0683    | CDS        | - | 906268 | 905273 | 996    | 331 NAD(P)H-dependent glycerol-3-phosphate dehydrogenase                                    | gpsA          | 1.1.1.94             |
| RSDT_0684    | CDS        | - | 906643 | 906446 | 198    | 65 copper chaperon                                                                          | copZ          |                      |
| RSDT_pg_120  | pseudogene | - | 907303 | 906923 | 381 x  | pseudogene of type I DNA restriction-modification system adenine-specific methylase subunit | hsdM          |                      |
| RSDT_tRNA_38 | tRNA       | - | 908043 | 907957 | 87 xx  | tRNA-Leu                                                                                    |               |                      |
| RSDT_0685    | CDS        | - | 910146 | 908296 | 1851   | 616 DNA mismatch repair protein MutL                                                        | MutL          |                      |
| RSDT_0686    | CDS        | - | 910505 | 910215 | 291    | 96 riboflavin kinase                                                                        | ribC          | 2.7.1.26             |
| RSDT_0687    | CDS        | - | 911142 | 910507 | 636    | 211 FAD synthase                                                                            | ribF          | 2.7.7.2              |
| RSDT_0688    | CDS        | - | 911684 | 911211 | 474    | 157 conserved hypothetical protein                                                          |               |                      |
| RSDT_0689    | CDS        | - | 913209 | 911710 | 1500   | 499 ATP-dependent RNA helicase DbpA                                                         | dbpA          | 3.6.4.13             |
| RSDT_0690    | CDS        | - | 914357 | 913299 | 1059   | 352 uncharacterized lipoprotein                                                             |               |                      |
| RSDT_0691    | CDS        | - | 916206 | 914377 | 1830   | 609 uncharacterized GTPase TypA/BipA                                                        | typA          |                      |
| RSDT_0692    | CDS        | + | 916434 | 917846 | 1413   | 470 acetyl-CoA carboxylase biotin carboxylase subunit                                       | accC/<br>fabG | 6.4.1.2/<br>6.3.4.14 |
| RSDT_0693    | CDS        | + | 917920 | 920169 | 2250   | 749 acetyl-CoA carboxylase carboxyltransferase subunit alpha/beta                           | accAD         | 6.4.1.2              |
| RSDT_0694    | CDS        | + | 920175 | 920825 | 651    | 216 biotin-carboxy-carrier-protein                                                          | accB          | 6.4.1.2              |
| RSDT_0695    | CDS        | + | 920825 | 921163 | 339    | 112 conserved hypothetical protein                                                          |               |                      |
| RSDT_0696    | CDS        | + | 921197 | 921700 | 504    | 167 single-strand DNA-binding protein                                                       | ssb           |                      |
| RSDT_0697    | CDS        | + | 921881 | 923152 | 1272   | 423 sulfate adenylyltransferase                                                             | sat           | 2.7.7.4              |
| RSDT_0698    | CDS        | + | 923291 | 924268 | 978    | 325 conserved hypothetical protein                                                          |               |                      |
| RSDT_0699    | CDS        | + | 924616 | 927687 | 3072   | 1023 outer membrane autotransporter                                                         |               |                      |
| RSDT_0700    | CDS        | - | 930788 | 927804 | 2985   | 994 uncharacterized AsmA family protein                                                     |               |                      |
| RSDT_0701    | CDS        | - | 931331 | 931023 | 309    | 102 conserved hypothetical protein                                                          |               |                      |
| RSDT_pg_121  | pseudogene | + | 931463 | 932658 | 1196 x | pseudogene of radical SAM domain protein                                                    |               |                      |
| RSDT_0702    | CDS        | - | 934277 | 932640 | 1638   | 545 oligopeptide/dipeptide ABC transporter substrate-binding protein DppA                   | dppA          |                      |
| RSDT_0703    | CDS        | + | 934330 | 937584 | 3255   | 1084 SNF2/helicase domain-containing protein                                                |               |                      |
| RSDT_0704    | CDS        | - | 939984 | 937603 | 2382   | 793 diguanylate cyclase domain-containing protein                                           |               |                      |

|              |            |   |        |        |        |                                                                     |      |          |
|--------------|------------|---|--------|--------|--------|---------------------------------------------------------------------|------|----------|
| RSDT_0705    | CDS        | - | 943679 | 940350 | 3330   | 1109 UvrD/Rep family helicase-like protein                          |      |          |
| RSDT_0706    | CDS        | - | 945794 | 943707 | 2088   | 695 U32 family peptidase                                            |      |          |
| RSDT_0707    | CDS        | - | 946810 | 945791 | 1020   | 339 putative UDP-glucuronate 5'-epimerase                           | lspL | 5.1.3.12 |
| RSDT_0708    | CDS        | - | 947483 | 947079 | 405    | 134 hypothetical protein                                            |      |          |
| RSDT_0709    | CDS        | - | 948799 | 947582 | 1218   | 405 aspartate kinase                                                | lysC | 2.7.2.4  |
| RSDT_0710    | CDS        | - | 950172 | 949093 | 1080   | 359 Xaa-Pro dipeptidase                                             | pepQ | 3.4.13.9 |
| RSDT_0711    | CDS        | - | 952708 | 950189 | 2520   | 839 preprotein translocase subunit SecA                             | secA |          |
| RSDT_pg_122  | pseudogene | - | 953023 | 952726 | 298 x  | pseudogene of Fis family sigma54-specific transcriptional regulator |      |          |
| RSDT_pg_123  | pseudogene | + | 953411 | 953572 | 162 x  | pseudogene of conserved hypothetical protein                        |      |          |
| RSDT_pg_124  | pseudogene | + | 953572 | 953828 | 257 x  | pseudogene of conserved hypothetical protein                        |      |          |
| RSDT_0712    | CDS        | + | 953852 | 955966 | 2115   | 704 putative exoribonuclease II                                     | rnb  | 3.1.13.1 |
| RSDT_0713    | CDS        | + | 956023 | 956640 | 618    | 205 glycerol-3-phosphate acyltransferase                            | plsY | 2.3.1.15 |
| RSDT_0714    | CDS        | + | 956657 | 958105 | 1449   | 482 threonine synthase                                              | thrC | 4.2.3.1  |
| RSDT_0715    | CDS        | - | 959912 | 958287 | 1626   | 541 conserved hypothetical protein                                  |      |          |
| RSDT_tRNA_39 | tRNA       | + | 960264 | 960356 | 93 xx  | tRNA-Ser                                                            |      |          |
| RSDT_pg_125  | pseudogene | - | 961739 | 960470 | 1270 x | pseudogene of phage integrase                                       |      |          |
| RSDT_tRNA_40 | tRNA       | - | 961999 | 961924 | 76 xx  | tRNA-Asn                                                            |      |          |
| RSDT_0716    | CDS        | - | 962657 | 962061 | 597    | 198 conserved hypothetical protein                                  |      |          |
| RSDT_0717    | CDS        | - | 963944 | 962841 | 1104   | 367 preprotein translocase subunit SecF                             | secF |          |
| RSDT_0718    | CDS        | - | 965543 | 963960 | 1584   | 527 preprotein translocase subunit SecD                             | secD |          |
| RSDT_0719    | CDS        | - | 965934 | 965578 | 357    | 118 preprotein translocase subunit YajC                             | yajC |          |
| RSDT_0720    | CDS        | - | 968524 | 966329 | 2196   | 731 ribonuclease E-like protein                                     | rne  |          |
| RSDT_0721    | CDS        | + | 968896 | 970821 | 1926   | 641 ATP-dependent zinc metalloprotease FtsH                         | ftsH | 3.4.24.- |
| RSDT_0722    | CDS        | + | 970866 | 971774 | 909    | 302 dihydropteroate synthase                                        | folP | 2.5.1.15 |
| RSDT_0723    | CDS        | + | 971767 | 972501 | 735    | 244 putative cyclic-di-AMP synthase                                 | dacA | 2.7.7.85 |
| RSDT_0724    | CDS        | + | 972488 | 973471 | 984    | 327 conserved hypothetical protein                                  |      |          |
| RSDT_0725    | CDS        | + | 973474 | 974826 | 1353   | 450 phosphoglucosamine mutase                                       | glmM | 5.4.2.10 |

|              |            |   |         |         |      |     |                                                                  |      |                       |
|--------------|------------|---|---------|---------|------|-----|------------------------------------------------------------------|------|-----------------------|
| RSDT_0726    | CDS        | + | 975107  | 975547  | 441  | 146 | MerR family transcriptional regulator                            |      |                       |
| RSDT_pg_126  | pseudogene | + | 975548  | 977580  | 2033 | x   | pseudogene of VIT-vWA domains-containing uncharacterized protein |      |                       |
| RSDT_0727    | CDS        | + | 978549  | 979175  | 627  | 208 | uncharacterized metallo-hydrolase                                |      |                       |
| RSDT_0728    | CDS        | + | 979172  | 979780  | 609  | 202 | uncharacterized iron-sulfur flavoprotein                         |      |                       |
| RSDT_pg_127  | pseudogene | + | 979799  | 980544  | 746  | x   | pseudogene of ComF/GntX family protein                           |      |                       |
| RSDT_0729    | CDS        | + | 980618  | 981655  | 1038 | 345 | conserved hypothetical protein                                   |      |                       |
| RSDT_0730    | CDS        | + | 981829  | 982740  | 912  | 303 | conserved hypothetical protein                                   |      |                       |
| RSDT_0731    | CDS        | + | 982753  | 983148  | 396  | 131 | thioesterase superfamily protein                                 |      |                       |
| RSDT_0732    | CDS        | - | 984104  | 983289  | 816  | 271 | selenium-dependent molybdenum hydroxylase accessory protein YqeB | yqeB |                       |
| RSDT_pg_128  | pseudogene | - | 985768  | 984251  | 1518 | x   | pseudogene of conserved hypothetical protien                     |      |                       |
| RSDT_0733    | CDS        | - | 988359  | 985789  | 2571 | 856 | putative aldehyde oxidoreductase                                 | mop  | 1.2.99.7              |
| RSDT_0734    | CDS        | - | 989847  | 988390  | 1458 | 485 | putative nucleobase : H+ symporter                               | ygfO |                       |
| RSDT_0735    | CDS        | - | 992543  | 989874  | 2670 | 889 | putative selenate reductase                                      | ygfK | 1.97.1.9              |
| RSDT_0736    | CDS        | - | 993860  | 992574  | 1287 | 428 | uncharacterized amidohydrolase SsnA                              | ssnA |                       |
| RSDT_0737    | CDS        | - | 995274  | 993883  | 1392 | 463 | phenylhydantoinase/dihydropyrimidinase-like protein YgeZ         | ygeZ | 3.5.2.2               |
| RSDT_0738    | CDS        | - | 996543  | 995347  | 1197 | 398 | putative oxamate carbamoyltransferas YgeW                        | ygeW | 2.1.3.5               |
| RSDT_0739    | CDS        | - | 998112  | 997147  | 966  | 321 | carbamate kinase                                                 | arcC | 2.7.2.2               |
| RSDT_0740    | CDS        | - | 999335  | 998124  | 1212 | 403 | M20A peptidase family aminohydrolase YgeY                        | ygeY |                       |
| RSDT_0741    | CDS        | - | 1000587 | 999367  | 1221 | 406 | diaminopropionate ammonia-lyase YgeX                             | ygeX | 4.3.1.15/<br>4.3.1.19 |
| RSDT_0742    | CDS        | + | 1000884 | 1001264 | 381  | 126 | putative enamine/imine deaminase                                 | yjgF | 3.5.4.-               |
| RSDT_0743    | CDS        | - | 1002491 | 1001355 | 1137 | 378 | conserved hypothetical protein                                   |      |                       |
| RSDT_0744    | CDS        | + | 1002703 | 1002921 | 219  | 72  | conserved hypothetical protein                                   |      |                       |
| RSDT_0745    | CDS        | + | 1002905 | 1003567 | 663  | 220 | putative septum formation protein Maf                            | maf  |                       |
| RSDT_tRNA_41 | tRNA       | + | 1003649 | 1003724 | 76   | xx  | tRNA-Phe                                                         |      |                       |
| RSDT_pg_129  | pseudogene | + | 1003792 | 1004370 | 579  | x   | pseudogene of phage integrase                                    |      |                       |
| RSDT_pg_130  | pseudogene | + | 1004287 | 1004842 | 556  | x   | pseudogene of conserved hypothetical gene                        |      |                       |

|             |            |   |         |         |       |                                                                        |      |                        |
|-------------|------------|---|---------|---------|-------|------------------------------------------------------------------------|------|------------------------|
| RSDT_0746   | CDS        | - | 1006397 | 1005117 | 1281  | 426 bifunctional folylpolyglutamate synthase/ dihydrofolate synthase   | folC | 6.3.2.17/<br>6.3.2.12  |
| RSDT_0747   | CDS        | - | 1006951 | 1006457 | 495   | 164 tRNA threonylcarbamoyladenosine biosynthesis protein TsaE          | tsaE |                        |
| RSDT_0748   | CDS        | - | 1008552 | 1006939 | 1614  | 537 bifunctional NAD(P)H-hydrate repair enzyme Nnr                     | nnr  | 4.2.1.136/<br>5.1.99.6 |
| RSDT_0749   | CDS        | - | 1008923 | 1008552 | 372   | 123 4'-phosphopantetheinyl transferase                                 | acpS | 2.7.8.7                |
| RSDT_pg_131 | pseudogene | + | 1009259 | 1010000 | 742 x | pseudogene of transposase                                              |      |                        |
| RSDT_0750   | CDS        | + | 1010134 | 1011081 | 948   | 315 periplasmic [NiFe] hydrogenase small subunit                       | hynA | 1.12.2.1               |
| RSDT_0751   | CDS        | + | 1011097 | 1012782 | 1686  | 561 periplasmic [NiFe] hydrogenase large subunit                       | hynB | 1.12.2.1               |
| RSDT_0752   | CDS        | - | 1013558 | 1013055 | 504   | 167 rubrerythrin (NADH peroxidase)                                     | rbr  | 1.11.1.1               |
| RSDT_0753   | CDS        | - | 1015502 | 1013667 | 1836  | 611 putative ABC-type lipidA/LPS exporter ATP-binding/permease protein | msbA |                        |
| RSDT_0754   | CDS        | - | 1016919 | 1015738 | 1182  | 393 putative glycosyltransferase involved in cell wall biogenesis      |      |                        |
| RSDT_0755   | CDS        | - | 1017388 | 1016960 | 429   | 142 conserved hypothetical protein                                     |      |                        |
| RSDT_0756   | CDS        | - | 1018481 | 1017375 | 1107  | 368 putative glycosyltransferase involved in cell wall biogenesis      |      |                        |
| RSDT_0757   | CDS        | - | 1019697 | 1018570 | 1128  | 375 membrane-bound metal-dependent hydrolase                           |      |                        |
| RSDT_0758   | CDS        | + | 1020185 | 1020826 | 642   | 213 phosphatidylserine decarboxylase                                   | psd  | 4.1.1.65               |
| RSDT_0759   | CDS        | + | 1020839 | 1021594 | 756   | 251 CDP-diacylglycerol/serine O-phosphatidyltransferase                | pssA | 2.7.8.8                |
| RSDT_0760   | CDS        | + | 1021728 | 1023278 | 1551  | 516 2-isopropylmalate synthase                                         | leuA | 2.3.3.13               |
| RSDT_0761   | CDS        | + | 1023367 | 1024635 | 1269  | 422 3-isopropylmalate dehydratase large subunit                        | leuC | 4.2.1.33/<br>4.2.1.35  |
| RSDT_0762   | CDS        | + | 1024706 | 1025203 | 498   | 165 3-isopropylmalate dehydratase small subunit                        | leuD | 4.2.1.33/<br>4.2.1.35  |
| RSDT_0763   | CDS        | + | 1025214 | 1026299 | 1086  | 361 3-isopropylmalate dehydrogenase                                    | leuB | 1.1.1.85               |
| RSDT_0764   | CDS        | - | 1027200 | 1026445 | 756   | 251 conserved hypothetical protein                                     |      |                        |
| RSDT_0765   | CDS        | - | 1028399 | 1027230 | 1170  | 389 phosphoglycerate kinase                                            | pgk  | 2.7.2.3                |
| RSDT_0766   | CDS        | - | 1030445 | 1028418 | 2028  | 675 transketolase                                                      | tkt  | 2.2.1.1                |
| RSDT_0767   | CDS        | - | 1031179 | 1030460 | 720   | 239 ribulose-phosphate 3-epimerase                                     | rpe  | 5.1.3.1                |
| RSDT_0768   | CDS        | - | 1031536 | 1031192 | 345   | 114 MerR family transcriptional regulator                              |      |                        |
| RSDT_0769   | CDS        | - | 1034014 | 1031597 | 2418  | 805 phenylalanyl-tRNA synthetase subunit beta                          | pheT | 6.1.1.20               |

|                     |             |          |                |                |           |                                                                                                 |      |                         |
|---------------------|-------------|----------|----------------|----------------|-----------|-------------------------------------------------------------------------------------------------|------|-------------------------|
| RSDT_0770           | CDS         | -        | 1034403        | 1034041        | 363       | 120 conserved hypothetical protein                                                              |      |                         |
| RSDT_0771           | CDS         | -        | 1035439        | 1034405        | 1035      | 344 phenylalanyl-tRNA synthetase subunit alpha                                                  | pheS | 6.1.1.20                |
| RSDT_0772           | CDS         | -        | 1035885        | 1035532        | 354       | 117 50S ribosomal protein L20                                                                   | rplT |                         |
| RSDT_0773           | CDS         | -        | 1036143        | 1035946        | 198       | 65 50S ribosomal protein L35                                                                    | rpmI |                         |
| RSDT_0774           | CDS         | -        | 1036802        | 1036290        | 513       | 170 translation initiation factor IF-3                                                          | infC |                         |
| RSDT_0775           | CDS         | -        | 1038765        | 1036822        | 1944      | 647 threonyl-tRNA synthetase                                                                    | thrS | 6.1.1.3                 |
| <b>RSDT_tRNA_42</b> | <b>tRNA</b> | <b>-</b> | <b>1038913</b> | <b>1038837</b> | <b>77</b> | <b>xx tRNA-Val</b>                                                                              |      |                         |
| RSDT_0776           | CDS         | +        | 1039093        | 1039395        | 303       | 100 conserved hypothetical protein                                                              |      |                         |
| RSDT_0777           | CDS         | -        | 1040289        | 1039507        | 783       | 260 cobalamin-5-phosphate synthase                                                              | cobS | 2.7.8.26                |
| RSDT_pg_132         | pseudogene  | +        | 1041074        | 1041627        | 554       | x pseudogene of phage integrase                                                                 |      |                         |
| RSDT_pg_133         | pseudogene  | +        | 1041629        | 1043726        | 2098      | x pseudogene of DNA methyltransferase                                                           |      |                         |
| RSDT_0778           | CDS         | +        | 1043836        | 1044360        | 525       | 174 putative anti-sigma-factor                                                                  |      |                         |
| RSDT_0779           | CDS         | +        | 1044492        | 1045511        | 1020      | 339 Hdr-like menaquinol oxidoreductase, transmembrane cytochrome b subunit DsrM                 | dsrM |                         |
| RSDT_0780           | CDS         | +        | 1045524        | 1047182        | 1659      | 552 Hdr-like menaquinol oxidoreductase, cytoplasmic iron-sulfur binding subunit DsrK            | dsrK |                         |
| RSDT_0781           | CDS         | +        | 1047175        | 1047555        | 381       | 126 Hdr-like menaquinol oxidoreductase, membrane bound triheme cytochrome c subunit DsrJ        | dsrJ |                         |
| RSDT_0782           | CDS         | +        | 1047555        | 1048346        | 792       | 263 Hdr-like menaquinol oxidoreductase, membrane bound triheme iron-sulfur binding subunit DsrO | dsrO |                         |
| RSDT_0783           | CDS         | +        | 1048359        | 1049528        | 1170      | 389 Hdr-like menaquinol oxidoreductase, integral transmembrane subunit DsrP                     | dsrP |                         |
| RSDT_pg_134         | pseudogene  | -        | 1051516        | 1049567        | 1950      | x pseudogene of heavy metal-translocating P-type ATPase                                         |      |                         |
| RSDT_0784           | CDS         | -        | 1051868        | 1051488        | 381       | 126 heavy metal-resistance transcriptional regulator                                            |      |                         |
| RSDT_0785           | CDS         | +        | 1052059        | 1053432        | 1374      | 457 multifunctional CCA protein                                                                 | cca  | 2.7.7.72                |
| RSDT_0786           | CDS         | -        | 1054248        | 1053472        | 777       | 258 16S/23S rRNA (cytidine-2'-O)-methyltransferase                                              | tlyA | 2.1.1.226/<br>2.1.1.227 |
| RSDT_0787           | CDS         | +        | 1054501        | 1054914        | 414       | 137 cytochrome c-type biogenesis protein, heme chaperon CcmE                                    | ccmE |                         |
| RSDT_0788           | CDS         | +        | 1054999        | 1056909        | 1911      | 636 cytochrome c-type biogenesis protein, assembly protein CcmF                                 | ccmF |                         |
| RSDT_0789           | CDS         | +        | 1056925        | 1057590        | 666       | 221 cytochrome c-type biogenesis protein, heme ABC exporter ATP-binding protein CcmA            | ccmA | 3.6.3.41                |

|             |            |   |         |         |      |      |                                                                                    |      |                     |
|-------------|------------|---|---------|---------|------|------|------------------------------------------------------------------------------------|------|---------------------|
| RSDT_0790   | CDS        | + | 1057578 | 1058255 | 678  | 225  | cytochrome c-type biogenesis protein, heme ABC exporter transmembrane protein CcmB | ccmB |                     |
| RSDT_0791   | CDS        | + | 1058256 | 1058939 | 684  | 227  | cytochrome c-type biogenesis protein, heme ABC exporter transmembrane protein CcmC | ccmC |                     |
| RSDT_0792   | CDS        | + | 1058983 | 1059123 | 141  | 46   | conserved hypothetical protein                                                     |      |                     |
| RSDT_0793   | CDS        | + | 1059116 | 1060198 | 1083 | 360  | hypothetical protein                                                               |      |                     |
| RSDT_0794   | CDS        | + | 1060337 | 1063828 | 3492 | 1163 | putative signal transduction histidine kinase                                      |      |                     |
| RSDT_0795   | CDS        | + | 1063851 | 1065263 | 1413 | 470  | cardiolipin synthase                                                               | cls  | 2.7.8.-             |
| RSDT_pg_135 | pseudogene | + | 1065351 | 1065516 | 166  | x    | pseudogene of transposase                                                          |      |                     |
| RSDT_0796   | CDS        | - | 1067092 | 1065542 | 1551 | 516  | polysaccharide export protein                                                      |      |                     |
| RSDT_0797   | CDS        | - | 1067448 | 1067089 | 360  | 119  | putative membrane-bound lipoprotein                                                |      |                     |
| RSDT_0798   | CDS        | + | 1068114 | 1069439 | 1326 | 441  | carboxy-terminal-processing protease                                               | ctpA | 3.4.21.102          |
| RSDT_0799   | CDS        | + | 1069491 | 1070294 | 804  | 267  | pyrroline-5-carboxylate reductase                                                  | proC | 1.5.1.2             |
| RSDT_0800   | CDS        | - | 1071010 | 1070297 | 714  | 237  | conserved hypothetical protein                                                     |      |                     |
| RSDT_0801   | CDS        | + | 1071502 | 1072209 | 708  | 235  | outer membrane chaperone Skp                                                       | skp  |                     |
| RSDT_0802   | CDS        | + | 1072591 | 1074267 | 1677 | 558  | conserved hypothetical protein                                                     |      |                     |
| RSDT_0803   | CDS        | + | 1074282 | 1075574 | 1293 | 430  | phosphoribosylamine-glycine ligase                                                 | purD | 6.3.4.13            |
| RSDT_0804   | CDS        | + | 1075584 | 1076084 | 501  | 166  | 5-(carboxyamino)imidazole ribonucleotide mutase                                    | purE | 5.4.99.18           |
| RSDT_0805   | CDS        | - | 1077101 | 1076139 | 963  | 320  | uncharacterized glycosyltransferase                                                |      |                     |
| RSDT_0806   | CDS        | - | 1077526 | 1077101 | 426  | 141  | uncharacterized glycosyltransferase                                                |      |                     |
| RSDT_0807   | CDS        | - | 1078717 | 1077566 | 1152 | 383  | uncharacterized aminotransferase                                                   |      |                     |
| RSDT_pg_136 | pseudogene | - | 1079098 | 1078769 | 330  | x    | pseudogene of chemotaxis signal transduction protein CheW                          | cheW |                     |
| RSDT_0808   | CDS        | - | 1079735 | 1079100 | 636  | 211  | thiamine-phosphate pyrophosphorylase                                               | thiE | 2.5.1.3             |
| RSDT_0809   | CDS        | + | 1079885 | 1082470 | 2586 | 861  | small-conductance mechanosensitive ion channel MscS                                | mcsS |                     |
| RSDT_0810   | CDS        | - | 1083358 | 1082489 | 870  | 289  | tRNA (adenine(57)-N(1)/adenine(58)-N(1))-methyltransferase                         | trmI | 2.1.1.219           |
| RSDT_0811   | CDS        | - | 1085871 | 1083430 | 2442 | 813  | peptidoglycan transglycosylase/DD-transpeptidase                                   | mrcA | 2.4.2.-/<br>3.4.-.- |
| RSDT_0812   | CDS        | - | 1086306 | 1085989 | 318  | 105  | dissimilatory sulfite reductase subunit gamma                                      | dsrC | 1.8.99.3            |
| RSDT_pg_137 | pseudogene | - | 1086626 | 1086492 | 135  | x    | pseudogene of transposase                                                          |      |                     |

|             |            |   |         |         |      |     |                                                                 |                 |
|-------------|------------|---|---------|---------|------|-----|-----------------------------------------------------------------|-----------------|
| RSDT_pg_138 | pseudogene | - | 1087579 | 1086694 | 886  | x   | pseudogene of dye-decolorishing (DyP) peroxidase family protein | 1.11.1.-        |
| RSDT_0813   | CDS        | - | 1088392 | 1087607 | 786  | 261 | cobalt-precorrin-4 C(11)-methyltransferase                      | cbiF 2.1.1.271  |
| RSDT_0814   | CDS        | - | 1089815 | 1088442 | 1374 | 457 | precorrin-6Y C5,15-methyltransferase (decarboxylating)          | cbiET 2.1.1.132 |
| RSDT_0815   | CDS        | - | 1090996 | 1089803 | 1194 | 397 | cobalt-precorrin-5B (C1)-methyltransferase                      | cbiD 2.1.1.195  |
| RSDT_pg_139 | pseudogene | - | 1091346 | 1090993 | 354  |     | pseudogene of conserved hypothetical protein                    |                 |
| RSDT_pg_140 | pseudogene | - | 1092316 | 1091575 | 742  | x   | pseudogene of transposase                                       |                 |
| RSDT_0816   | CDS        | + | 1092585 | 1093883 | 1299 | 432 | O-acetylhomoserine/O-acetylserine sulfhydrylase                 | metY 2.5.1.49   |
| RSDT_pg_141 | pseudogene | + | 1093926 | 1094414 | 489  | x   | pseudogene of chemotaxis protein CheV                           | cheV            |
| RSDT_0817   | CDS        | - | 1095197 | 1094415 | 783  | 260 | molybdate ABC transporter ATP-binding protein                   | modC 3.6.3.29   |
| RSDT_0818   | CDS        | - | 1095897 | 1095208 | 690  | 229 | molybdate ABC transporter permease                              | modB            |
| RSDT_0819   | CDS        | - | 1096667 | 1095903 | 765  | 254 | molybdate ABC transporter substrate-binding protein             | modA            |
| RSDT_0820   | CDS        | + | 1096808 | 1097938 | 1131 | 376 | molybdate transport system regulatory protein                   | modE            |
| RSDT_0821   | CDS        | + | 1097949 | 1100303 | 2355 | 784 | [NiFe] hydrogenase maturation protein HypF                      | hypF            |
| RSDT_0822   | CDS        | + | 1100505 | 1101887 | 1383 | 460 | GTPase EngA                                                     | engA            |
| RSDT_pg_142 | pseudogene | - | 1103500 | 1102287 | 1214 | x   | pseudogene of major facilitator family protein                  |                 |
| RSDT_0823   | CDS        | - | 1104497 | 1103547 | 951  | 316 | PfkB family kinase                                              |                 |
| RSDT_0824   | CDS        | - | 1104897 | 1104565 | 333  | 110 | divalent ion tolerance protein CutA                             | cutA            |
| RSDT_0825   | CDS        | - | 1106875 | 1105301 | 1575 | 524 | cobyric acid synthase                                           | cbiP 6.3.5.10   |
| RSDT_0826   | CDS        | + | 1107140 | 1108480 | 1341 | 446 | DNA repair protein RadA/Sms                                     | radA            |
| RSDT_0827   | CDS        | + | 1108528 | 1109157 | 630  | 209 | adenylate cyclase class 2                                       | cyaB 4.6.1.1    |
| RSDT_0828   | CDS        | + | 1109144 | 1109458 | 315  | 104 | ATP-dependent Clp protease adaptor protein ClpS                 | clpS            |
| RSDT_0829   | CDS        | + | 1109505 | 1111766 | 2262 | 753 | ATP-dependent Clp protease ATP-binding protein ClpA             | clpA            |
| RSDT_0830   | CDS        | + | 1111777 | 1113795 | 2019 | 672 | excinuclease ABC subunit B                                      | uvrB            |
| RSDT_pg_143 | pseudogene | - | 1114734 | 1114000 | 735  | x   | pseudogene of phage protein Gp37/68                             |                 |
| RSDT_0831   | CDS        | - | 1116234 | 1114822 | 1413 | 470 | aromatic amino acid permease AroP                               | aroP            |
| RSDT_0832   | CDS        | - | 1117026 | 1116307 | 720  | 239 | putative racemase                                               |                 |
| RSDT_0833   | CDS        | - | 1117990 | 1117073 | 918  | 305 | GTPase Era                                                      | era             |

|              |            |   |         |         |       |                                                                    |       |                        |
|--------------|------------|---|---------|---------|-------|--------------------------------------------------------------------|-------|------------------------|
| RSDT_0834    | CDS        | - | 1119184 | 1118162 | 1023  | 340 DNA polymerase III delta                                       | holA  |                        |
| RSDT_0835    | CDS        | - | 1121786 | 1119270 | 2517  | 838 leucyl-tRNA synthetase                                         | leuS  | 6.1.1.4                |
| RSDT_0836    | CDS        | - | 1122365 | 1121892 | 474   | 157 transcription antitermination factor NusB                      | nusB  |                        |
| RSDT_0837    | CDS        | - | 1122845 | 1122369 | 477   | 158 6,7-dimethyl-8-ribityllumazine synthase                        | ribH  | 2.5.1.78               |
| RSDT_0838    | CDS        | - | 1123850 | 1123197 | 654   | 217 riboflavin synthase                                            | ribE  | 2.5.1.9                |
| RSDT_0839    | CDS        | - | 1125014 | 1123881 | 1134  | 377 riboflavin biosynthesis protein RibD                           | ribD  | 3.5.4.26/<br>1.1.1.193 |
| RSDT_0840    | CDS        | - | 1125486 | 1125007 | 480   | 159 CMP/dCMP deaminase                                             | comEB | 3.5.4.12               |
| RSDT_0841    | CDS        | - | 1126740 | 1125502 | 1239  | 412 serine hydroxymethyltransferase                                | glyA  | 2.1.2.1                |
| RSDT_0842    | CDS        | - | 1128108 | 1126861 | 1248  | 415 3-oxoacyl-[acyl-carrier-protein] synthase 2                    | fabF  | 2.3.1.179              |
| RSDT_0843    | CDS        | - | 1128457 | 1128221 | 237   | 78 acyl carrier protein                                            | acpP  |                        |
| RSDT_0844    | CDS        | - | 1129282 | 1128512 | 771   | 256 3-oxoacyl-[acyl-carrier-protein] reductase                     | fabG  | 1.1.1.100              |
| RSDT_0845    | CDS        | - | 1130378 | 1129392 | 987   | 328 3-oxoacyl-[acyl-carrier-protein] synthase 3                    | fabH  | 2.3.1.180              |
| RSDT_0846    | CDS        | - | 1131428 | 1130394 | 1035  | 344 Acyl-[acyl-carrier-protein]-phosphate acyltransferase          | PlsX  | 2.3.1.-                |
| RSDT_0847    | CDS        | - | 1131610 | 1131428 | 183   | 60 50S ribosomal protein L32                                       | rpmF  |                        |
| RSDT_0848    | CDS        | + | 1132051 | 1132845 | 795   | 264 TauE/SafE family permease                                      |       |                        |
| RSDT_0849    | CDS        | + | 1132927 | 1134126 | 1200  | 399 amidohydrolase family protein                                  |       |                        |
| RSDT_tRNA_43 | tRNA       | + | 1134218 | 1134294 | 77 xx | tRNA-Asp                                                           |       |                        |
| RSDT_pg_144  | pseudogene | + | 1134660 | 1134951 | 292 x | pseudogene of conserved hypothetical protein                       |       |                        |
| RSDT_tRNA_44 | tRNA       | - | 1135406 | 1135331 | 76 xx | tRNA-Val                                                           |       |                        |
| RSDT_0850    | CDS        | + | 1135946 | 1136887 | 942   | 313 putative High-molecular-weight cytochrome c subunit E          | hmcE  |                        |
| RSDT_0851    | CDS        | + | 1136902 | 1138497 | 1596  | 531 High-molecular-weight cytochrome c subunit F                   | hmcF  |                        |
| RSDT_0852    | CDS        | + | 1139202 | 1140104 | 903   | 300 hydroxy monocarboxylic acid anion dehydrogenase family protein |       |                        |
| RSDT_tRNA_45 | tRNA       | + | 1140248 | 1140324 | 77 xx | tRNA-Pro                                                           |       |                        |
| RSDT_pg_145  | pseudogene | - | 1141165 | 1140614 | 552 x | pseudogene of uncharacterized radical SAM protein                  |       |                        |
| RSDT_pg_146  | pseudogene | + | 1141168 | 1141593 | 426 x | pseudogene of catalase                                             | catA  | 1.11.1.6               |
| RSDT_0853    | CDS        | + | 1141858 | 1142964 | 1107  | 368 GTPase Obg                                                     | obg   |                        |
| RSDT_0854    | CDS        | + | 1142970 | 1144190 | 1221  | 406 glutamate 5-kinase                                             | proB  | 2.7.2.11               |



|             |            |   |         |         |      |     |                                                                                                         |       |                        |
|-------------|------------|---|---------|---------|------|-----|---------------------------------------------------------------------------------------------------------|-------|------------------------|
| RSDT_0855   | CDS        | - | 1144726 | 1144187 | 540  | 179 | 2-oxoglutarate synthase subunit gamma                                                                   | korC  | 1.2.7.3                |
| RSDT_0856   | CDS        | - | 1145522 | 1144719 | 804  | 267 | 2-oxoglutarate synthase subunit beta                                                                    | korB  | 1.2.7.3                |
| RSDT_0857   | CDS        | - | 1146613 | 1145522 | 1092 | 363 | 2-oxoglutarate synthase subunit alpha                                                                   | korA  | 1.2.7.3                |
| RSDT_0858   | CDS        | - | 1146834 | 1146610 | 225  | 74  | 2-oxoglutarate synthase subunit delta                                                                   | korD  | 1.2.7.3                |
| RSDT_0859   | CDS        | - | 1148020 | 1146914 | 1107 | 368 | S-adenosylmethionine-tRNA ribosyltransferase-isomerase                                                  | queA  | 2.4.99.17              |
| RSDT_pg_147 | pseudogene | - | 1149448 | 1148562 | 887  | x   | pseudogene of rhomboid-like membrane bound protease                                                     |       |                        |
| RSDT_0860   | CDS        | - | 1149721 | 1149512 | 210  | 69  | 50S ribosomal protein L28                                                                               | rpmB  |                        |
| RSDT_0861   | CDS        | - | 1151256 | 1150381 | 876  | 291 | H <sup>+</sup> -translocating [NiFe] hydrogenase complex, iron-sulfur subunit EchF                      | echF  |                        |
| RSDT_0862   | CDS        | - | 1152719 | 1151274 | 1446 | 481 | H <sup>+</sup> -translocating [NiFe] hydrogenase complex, large subunit EchE                            | echE  |                        |
| RSDT_pg_148 | pseudogene | - | 1152822 | 1151275 | 1548 | x   | pseudogene (N-terminal) of H <sup>+</sup> -translocating [NiFe] hydrogenase complex, large subunit EchE |       |                        |
| RSDT_0863   | CDS        | - | 1154379 | 1152913 | 1467 | 488 | H <sup>+</sup> -translocating [NiFe] hydrogenase complex, transmembrane subunit EchD                    | echD  |                        |
| RSDT_0864   | CDS        | - | 1155064 | 1154402 | 663  | 220 | H <sup>+</sup> -translocating [NiFe] hydrogenase complex, small subunit EchC                            | echC  |                        |
| RSDT_0865   | CDS        | - | 1156023 | 1155061 | 963  | 320 | H <sup>+</sup> -translocating [NiFe] hydrogenase complex, transmembrane subunit EchB                    | echB  |                        |
| RSDT_0866   | CDS        | - | 1158095 | 1156032 | 2064 | 687 | H <sup>+</sup> -translocating [NiFe] hydrogenase complex, transmembrane subunit EchA                    | echA  |                        |
| RSDT_pg_149 | pseudogene | - | 1158345 | 1158070 | 276  | x   | pseudogene of phenylacetate-coenzyme A ligase                                                           | paaK  | 6.2.1.30               |
| RSDT_pg_150 | pseudogene | + | 1158456 | 1158665 | 210  | x   | pseudogene of transposase                                                                               |       |                        |
| RSDT_0867   | CDS        | + | 1158740 | 1160041 | 1302 | 433 | 8-amino-7-oxononanoate synthase                                                                         | bioF  | 2.3.1.47               |
| RSDT_0868   | CDS        | + | 1160028 | 1161314 | 1287 | 428 | putative colanic acid biosynthesis glycosyltransferase WcaL                                             | wcaL  |                        |
| RSDT_0869   | CDS        | + | 1161280 | 1162299 | 1020 | 339 | putative uncharacterized LPS biosynthesis protein WalW                                                  | walW  |                        |
| RSDT_0870   | CDS        | + | 1162296 | 1163594 | 1299 | 432 | group 1 glycosyl transferase                                                                            |       |                        |
| RSDT_0871   | CDS        | + | 1163582 | 1165489 | 1908 | 635 | Asparagine synthase (glutamine-hydrolysing)                                                             | asnB  | 6.3.5.4                |
| RSDT_pg_151 | pseudogene | + | 1165716 | 1167837 | 2122 | x   | pseudogene of multidrug transporter subunit MdtC                                                        | mdtC  |                        |
| RSDT_0872   | CDS        | + | 1168024 | 1169238 | 1215 | 404 | bifunctional riboflavin biosynthesis protein RibBA                                                      | ribBA | 4.1.99.12/<br>3.5.4.25 |
| RSDT_pg_152 | pseudogene | + | 1169333 | 1169601 | 269  | x   | pseudogene of putative lactate utilization protein A                                                    | lutA  |                        |
| RSDT_pg_153 | pseudogene | + | 1169619 | 1170213 | 595  | x   | pseudogene of putative lactate utilization protein C                                                    | lutC  |                        |

|             |            |   |         |         |        |                                                                         |                |
|-------------|------------|---|---------|---------|--------|-------------------------------------------------------------------------|----------------|
| RSDT_pg_154 | pseudogene | + | 1170218 | 1170935 | 718 x  | pseudogene of putative lactate utilization protein B                    | lutB           |
| RSDT_pg_155 | pseudogene | + | 1170976 | 1171166 | 191 x  | pseudogene of L-lactate permease                                        | lctP           |
| RSDT_pg_156 | pseudogene | - | 1173927 | 1171383 | 2545 x | pseudogene of DNA internalization-related competence protein ComEC/Rec2 | comEC          |
| RSDT_0873   | CDS        | - | 1174388 | 1173933 | 456    | 151 SsrA-binding protein                                                | smpB           |
| RSDT_0874   | CDS        | - | 1175261 | 1174425 | 837    | 278 16S rRNA (cytidine1402-2'-O)-methyltransferase                      | rsmI 2.1.1.198 |
| RSDT_0875   | CDS        | - | 1175645 | 1175310 | 336    | 111 conserved hypothetical protein                                      | yraN           |
| RSDT_0876   | CDS        | - | 1176217 | 1175639 | 579    | 192 ribonuclease HII                                                    | rnhB 3.1.26.4  |
| RSDT_0877   | CDS        | - | 1176618 | 1176271 | 348    | 115 50S ribosomal protein L19                                           | rplS           |
| RSDT_0878   | CDS        | - | 1178042 | 1176747 | 1296   | 431 putative tRNA (guanine37-N1)-methyltransferase                      | trmD 2.1.1.228 |
| RSDT_0879   | CDS        | - | 1178962 | 1178174 | 789    | 262 conserved hypothetical protein                                      |                |
| RSDT_0880   | CDS        | - | 1179728 | 1179039 | 690    | 229 nicotinate-nucleotide adenylyltransferase                           | nadD 2.7.7.18  |
| RSDT_0881   | CDS        | - | 1181009 | 1179729 | 1281   | 426 gamma-glutamyl phosphate reductase                                  | proA 1.2.1.41  |
| RSDT_0882   | CDS        | + | 1181080 | 1181775 | 696    | 231 conserved hypothetical protein                                      |                |
| RSDT_pg_157 | pseudogene | + | 1181836 | 1182053 | 218 x  | pseudogene of indolepyruvate ferredoxin oxidoreductase subunit alpha    | IorA 1.2.7.8   |
| RSDT_0883   | CDS        | - | 1182656 | 1182144 | 513    | 170 conserved hypothetical protein                                      |                |
| RSDT_0884   | CDS        | + | 1182800 | 1184224 | 1425   | 474 adenosylhomocysteinase                                              | ahcY 3.3.1.1   |
| RSDT_0885   | CDS        | + | 1184331 | 1184900 | 570    | 189 ribonuclease H                                                      | rnhA 3.1.26.4  |
| RSDT_pg_158 | pseudogene | + | 1184936 | 1185704 | 769 x  | pseudogene of conserved hypothetical protein                            |                |
| RSDT_pg_159 | pseudogene | + | 1185715 | 1185962 | 248 x  | pseudogene of sulfite exporter TauE/SafE family protein                 | yfcA           |
| RSDT_0886   | CDS        | - | 1186830 | 1186084 | 747    | 248 conserved hypothetical protein                                      |                |
| RSDT_0887   | CDS        | - | 1188103 | 1186886 | 1218   | 405 electrochemical potential-driven transporter                        | yrbG           |
| RSDT_0888   | CDS        | + | 1188685 | 1189704 | 1020   | 339 conserved hypothetical protein                                      |                |
| RSDT_0889   | CDS        | - | 1190343 | 1189849 | 495    | 164 conserved hypothetical protein                                      |                |
| RSDT_0890   | CDS        | - | 1191710 | 1190400 | 1311   | 436 putative threonylcarbamoyladenine tRNA methylthiotransferase MtaB   | mtaB           |
| RSDT_0891   | CDS        | + | 1192202 | 1192834 | 633    | 210 hypothetical protein                                                |                |
| RSDT_0892   | CDS        | + | 1193899 | 1194216 | 318    | 105 30S ribosomal protein S10                                           | rpsJ           |

|           |     |   |         |         |      |     |                                           |      |           |
|-----------|-----|---|---------|---------|------|-----|-------------------------------------------|------|-----------|
| RSDT_0893 | CDS | + | 1194228 | 1194857 | 630  | 209 | 50S ribosomal protein L3                  | rplC |           |
| RSDT_0894 | CDS | + | 1194870 | 1195502 | 633  | 210 | 50S ribosomal protein L4                  | rplD |           |
| RSDT_0895 | CDS | + | 1195504 | 1195794 | 291  | 96  | 50S ribosomal protein L23                 | rplW |           |
| RSDT_0896 | CDS | + | 1195797 | 1196627 | 831  | 276 | 50S ribosomal protein L2                  | rplB |           |
| RSDT_0897 | CDS | + | 1196637 | 1196924 | 288  | 95  | 30S ribosomal protein S19                 | rpsS |           |
| RSDT_0898 | CDS | + | 1196934 | 1197272 | 339  | 112 | 50S ribosomal protein L22                 | rplV |           |
| RSDT_0899 | CDS | + | 1197275 | 1197916 | 642  | 213 | 30S ribosomal protein S3                  | rpsC |           |
| RSDT_0900 | CDS | + | 1197916 | 1198329 | 414  | 137 | 50S ribosomal protein L16                 | rplP |           |
| RSDT_0901 | CDS | + | 1198330 | 1198560 | 231  | 76  | 50S ribosomal protein L29                 | rpmC |           |
| RSDT_0902 | CDS | + | 1198557 | 1198826 | 270  | 89  | 30S ribosomal protein S17                 | rpsQ |           |
| RSDT_0903 | CDS | + | 1198836 | 1199204 | 369  | 122 | 50S ribosomal protein L14                 | rplN |           |
| RSDT_0904 | CDS | + | 1199213 | 1199545 | 333  | 110 | 50S ribosomal protein L24                 | rplX |           |
| RSDT_0905 | CDS | + | 1199555 | 1200094 | 540  | 179 | 50S ribosomal protein L5                  | rplE |           |
| RSDT_0906 | CDS | + | 1200136 | 1200321 | 186  | 61  | 30S ribosomal protein S14                 | rpsN |           |
| RSDT_0907 | CDS | + | 1200349 | 1200729 | 381  | 126 | 30S ribosomal protein S8                  | rpsH |           |
| RSDT_0908 | CDS | + | 1200740 | 1201279 | 540  | 179 | 50S ribosomal protein L6                  | rplF |           |
| RSDT_0909 | CDS | + | 1201288 | 1201647 | 360  | 119 | 50S ribosomal protein L18                 | rplR |           |
| RSDT_0910 | CDS | + | 1201649 | 1202161 | 513  | 170 | 30S ribosomal protein S5                  | rpsE |           |
| RSDT_0911 | CDS | + | 1202164 | 1202340 | 177  | 58  | 50S ribosomal protein L30                 | rpmD |           |
| RSDT_0912 | CDS | + | 1202363 | 1202827 | 465  | 154 | 50S ribosomal protein L15                 | rplO |           |
| RSDT_0913 | CDS | + | 1202872 | 1204179 | 1308 | 435 | preprotein translocase subunit SecY       | secY |           |
| RSDT_0914 | CDS | + | 1204204 | 1204998 | 795  | 264 | methionine aminopeptidase                 | map  | 3.4.11.18 |
| RSDT_0915 | CDS | + | 1205082 | 1205195 | 114  | 37  | 50S ribosomal protein L36                 | rpmJ |           |
| RSDT_0916 | CDS | + | 1205211 | 1205579 | 369  | 122 | 30S ribosomal protein S13                 | rpsM |           |
| RSDT_0917 | CDS | + | 1205621 | 1206010 | 390  | 129 | 30S ribosomal protein S11                 | rpsK |           |
| RSDT_0918 | CDS | + | 1206060 | 1206686 | 627  | 208 | 30S ribosomal protein S4                  | rpsD |           |
| RSDT_0919 | CDS | + | 1206698 | 1207741 | 1044 | 347 | DNA-directed RNA polymerase subunit alpha | rpoA | 2.7.7.6   |

|              |            |   |         |         |      |      |                                                                             |      |           |
|--------------|------------|---|---------|---------|------|------|-----------------------------------------------------------------------------|------|-----------|
| RSDT_0920    | CDS        | + | 1207731 | 1208156 | 426  | 141  | 50S ribosomal protein L17                                                   | rplQ |           |
| RSDT_0921    | CDS        | + | 1208241 | 1209296 | 1056 | 351  | selenophosphate synthase                                                    | selD | 2.7.9.3   |
| RSDT_0922    | CDS        | - | 1210197 | 1209742 | 456  | 151  | hypothetical protein                                                        |      |           |
| RSDT_0923    | CDS        | + | 1210280 | 1210774 | 495  | 164  | putative transmembrane phospholipid methyltransferase                       |      |           |
| RSDT_tRNA_46 | tRNA       | - | 1211055 | 1210980 | 76   | xx   | tRNA-Ala                                                                    |      |           |
| RSDT_0924    | CDS        | + | 1211993 | 1213075 | 1083 | 360  | glutamin-(asparagin-)ase                                                    | ansB | 3.5.1.38  |
| RSDT_0925    | CDS        | + | 1213430 | 1213669 | 240  | 79   | 30S ribosomal protein S16                                                   | rpsP |           |
| RSDT_0926    | CDS        | + | 1213736 | 1213966 | 231  | 76   | uncharacterized RNA-binding protein                                         |      |           |
| RSDT_0927    | CDS        | + | 1213982 | 1214503 | 522  | 173  | 16S rRNA processing protein RimM                                            | rimM |           |
| RSDT_0928    | CDS        | + | 1214598 | 1217915 | 3318 | 1105 | uncharacterized membrane-bound acyl transferase                             |      |           |
| RSDT_0929    | CDS        | + | 1217920 | 1219386 | 1467 | 488  | uncharacterized outer membrane efflux protein                               |      |           |
| RSDT_0930    | CDS        | + | 1219386 | 1220300 | 915  | 304  | uncharacterized outer membrane efflux protein                               |      |           |
| RSDT_0931    | CDS        | + | 1220310 | 1221716 | 1407 | 468  | polysaccharide efflux protein RfbX                                          | rfbX |           |
| RSDT_pg_160  | pseudogene | - | 1223669 | 1221777 | 1893 | x    | pseudogene of putative glycosyltransferase involved in cell wall biogenesis |      |           |
| RSDT_0932    | CDS        | - | 1225746 | 1224598 | 1149 | 382  | putative glycosyltransferase involved in cell wall biogenesis               |      |           |
| RSDT_0933    | CDS        | - | 1226889 | 1226056 | 834  | 277  | chorismate dehydratase                                                      | mqnA | 4.2.1.151 |
| RSDT_pg_161  | pseudogene | - | 1227065 | 1226886 | 180  | x    | pseudogene of glucokinase                                                   | glk  | 2.7.1.2   |
| RSDT_0934    | CDS        | - | 1228003 | 1227062 | 942  | 313  | tRNA dimethylallyltransferase                                               | miaA | 2.5.1.75  |
| RSDT_0935    | CDS        | - | 1228539 | 1228000 | 540  | 179  | pantetheine-phosphate adenylyltransferase                                   | coaD | 2.7.7.3   |
| RSDT_0936    | CDS        | - | 1229087 | 1228536 | 552  | 183  | 16S rRNA m2G966 methyltransferase                                           | rsmD | 2.1.1.171 |
| RSDT_0937    | CDS        | + | 1229244 | 1229954 | 711  | 236  | conserved hypothetical protein                                              |      |           |
| RSDT_0938    | CDS        | + | 1229976 | 1230494 | 519  | 172  | tRNA(adenine34) deaminase                                                   | tadA | 3.5.4.33  |
| RSDT_0939    | CDS        | + | 1230585 | 1231403 | 819  | 272  | dihydroorotate dehydrogenase B electron transfer subunit                    | pyrK | 1.3.1.14  |
| RSDT_0940    | CDS        | + | 1231409 | 1232368 | 960  | 319  | dihydroorotate dehydrogenase B catalytic subunit                            | pyrD | 1.3.1.14  |
| RSDT_0941    | CDS        | + | 1232365 | 1233492 | 1128 | 375  | conserved hypothetical protein                                              | yghO |           |
| RSDT_0942    | CDS        | + | 1233526 | 1234569 | 1044 | 347  | NAD dependent epimerase/dehydratase family protein                          |      |           |
| RSDT_0943    | CDS        | + | 1234566 | 1236524 | 1959 | 652  | uncharacterized ABC transporter ATP-binding protein                         |      |           |

|             |            |   |         |         |      |     |                                                                                              |      |                        |
|-------------|------------|---|---------|---------|------|-----|----------------------------------------------------------------------------------------------|------|------------------------|
| RSDT_0944   | CDS        | - | 1237230 | 1236493 | 738  | 245 | SpsF-like glycosyltransferase putatively involved in cell wall biogenesis                    |      |                        |
| RSDT_0945   | CDS        | - | 1238885 | 1237263 | 1623 | 540 | SpsG-like glycosyltransferase putatively involved in cell wall biogenesis                    |      |                        |
| RSDT_0946   | CDS        | - | 1240157 | 1238958 | 1200 | 399 | SpsC-like aminotransferase putatively involved in cell wall biogenesis                       |      |                        |
| RSDT_0947   | CDS        | - | 1241322 | 1240240 | 1083 | 360 | uncharacterized metal-containing alcohol dehydrogenase family protein                        |      |                        |
| RSDT_0948   | CDS        | - | 1242188 | 1241334 | 855  | 284 | bifunctional methylenetetrahydrofolate dehydrogenase/methenyltetrahydrofolate cyclohydrolase | folD | 1.5.1.5/<br>3.5.4.9    |
| RSDT_0949   | CDS        | - | 1243501 | 1242185 | 1317 | 438 | enolase                                                                                      | eno  | 4.2.1.11               |
| RSDT_0950   | CDS        | - | 1244361 | 1243561 | 801  | 266 | type III pantothenate kinase                                                                 | coaX | 2.7.1.33               |
| RSDT_pg_162 | pseudogene | + | 1244720 | 1244881 | 162  | x   | pseudogene of transposase                                                                    |      |                        |
| RSDT_pg_163 | pseudogene | + | 1245933 | 1246134 | 202  | x   | pseudogene of transposase                                                                    |      |                        |
| RSDT_0951   | CDS        | - | 1247580 | 1246150 | 1431 | 476 | ZraS/AtoS/NtrY family regulatory prtotein                                                    |      |                        |
| RSDT_0952   | CDS        | - | 1248999 | 1247659 | 1341 | 446 | glucose-6-phosphate isomerase                                                                | pgi  | 5.3.1.9                |
| RSDT_0953   | CDS        | - | 1249885 | 1249055 | 831  | 276 | conserved hypothetical protein                                                               |      |                        |
| RSDT_0954   | CDS        | - | 1250301 | 1249993 | 309  | 102 | conserved hypothetical protein                                                               |      |                        |
| RSDT_0955   | CDS        | - | 1250968 | 1250390 | 579  | 192 | conserved hypothetical protein                                                               |      |                        |
| RSDT_0956   | CDS        | - | 1252043 | 1250982 | 1062 | 353 | conserved hypothetical protein                                                               |      |                        |
| RSDT_0957   | CDS        | - | 1252367 | 1252065 | 303  | 100 | conserved hypothetical protein                                                               |      |                        |
| RSDT_0958   | CDS        | + | 1252534 | 1255059 | 2526 | 841 | sigma 54 interacting domain-containing transmembrane protein                                 |      |                        |
| RSDT_0959   | CDS        | + | 1255056 | 1257626 | 2571 | 856 | putative pyruvate phosphate dikinase                                                         | pps2 | 2.7.9.2                |
| RSDT_0960   | CDS        | + | 1257659 | 1258924 | 1266 | 421 | major facilitator superfamily protein                                                        |      |                        |
| RSDT_0961   | CDS        | - | 1259596 | 1258931 | 666  | 221 | conserved hypothetical protein                                                               |      |                        |
| RSDT_0962   | CDS        | - | 1260150 | 1259590 | 561  | 186 | bifunctional adenosylcobinamide kinase/ adenosylcobinamide-phosphate guanylyltransferase     | cobU | 2.7.1.156/<br>2.7.7.62 |
| RSDT_0963   | CDS        | - | 1261373 | 1260147 | 1227 | 408 | conserved hypothetical protein                                                               |      |                        |
| RSDT_pg_164 | pseudogene | - | 1261810 | 1261512 | 299  | x   | pseudogene of transposase                                                                    |      |                        |
| RSDT_0964   | CDS        | - | 1262916 | 1262422 | 495  | 164 | alternative heme biosynthesis protein AhbA                                                   | ahbA |                        |
| RSDT_0965   | CDS        | - | 1264075 | 1262969 | 1107 | 368 | alternative heme biosynthesis protein AhbD                                                   | ahbD |                        |

|           |     |   |         |         |      |                                                                             |       |           |
|-----------|-----|---|---------|---------|------|-----------------------------------------------------------------------------|-------|-----------|
| RSDT_0966 | CDS | - | 1265064 | 1264075 | 990  | 329 porphobilinogen synthase                                                | hemB  | 4.2.1.24  |
| RSDT_0967 | CDS | - | 1266294 | 1265119 | 1176 | 391 alternative heme biosynthesis protein AhbC                              | ahbC  |           |
| RSDT_0968 | CDS | - | 1269140 | 1266450 | 2691 | 896 alanyl-tRNA synthetase                                                  | alaS  | 6.1.1.7   |
| RSDT_0969 | CDS | - | 1270244 | 1269156 | 1089 | 362 DNA recombinase RecA                                                    | recA  | 3.6.3.8   |
| RSDT_0970 | CDS | + | 1270467 | 1271252 | 786  | 261 chromosome partitioning protein ParA                                    | parA  |           |
| RSDT_0971 | CDS | + | 1271289 | 1272257 | 969  | 322 chromosome partitioning protein ParB                                    | parB  |           |
| RSDT_0972 | CDS | - | 1273213 | 1272227 | 987  | 328 methionyl-tRNA formyltransferase                                        | fmt   | 2.1.2.9   |
| RSDT_0973 | CDS | - | 1273704 | 1273186 | 519  | 172 peptide deformylase                                                     | def   | 3.5.1.88  |
| RSDT_0974 | CDS | - | 1275542 | 1273701 | 1842 | 613 aspartyl-tRNA synthase                                                  | aspS  | 6.1.1.12  |
| RSDT_0975 | CDS | - | 1276794 | 1275535 | 1260 | 419 histidyl-tRNA synthetase                                                | hisS  | 6.1.1.21  |
| RSDT_0976 | CDS | - | 1278233 | 1276827 | 1407 | 468 amidophosphoribosyltransferase                                          | purF  | 2.4.2.14  |
| RSDT_0977 | CDS | - | 1280968 | 1278461 | 2508 | 835 DNA gyrase subunit A                                                    | gyrA  | 5.99.1.3  |
| RSDT_0978 | CDS | - | 1283430 | 1281022 | 2409 | 802 DNA gyrase subunit B                                                    | gyrB  | 5.99.1.3  |
| RSDT_0979 | CDS | - | 1284581 | 1283430 | 1152 | 383 DNA polymerase III subunit beta                                         | dnaN  | 2.7.7.7   |
| RSDT_0980 | CDS | - | 1285745 | 1284726 | 1020 | 339 chromosomal replication initiator DnaA domain-containing protein        | dnaA2 |           |
| RSDT_0981 | CDS | + | 1285920 | 1287338 | 1419 | 472 M23 family peptidase                                                    |       |           |
| RSDT_0982 | CDS | - | 1288407 | 1287622 | 786  | 261 PurE-related protein                                                    |       |           |
| RSDT_0983 | CDS | + | 1288964 | 1289515 | 552  | 183 shikimate kinase                                                        | aroK  | 2.7.1.71  |
| RSDT_0984 | CDS | - | 1290061 | 1289540 | 522  | 173 conserved hypothetical protein                                          |       |           |
| RSDT_0985 | CDS | - | 1291085 | 1290090 | 996  | 331 OmpA family protein                                                     |       |           |
| RSDT_0986 | CDS | + | 1291961 | 1293418 | 1458 | 485 inosine-5'-monophosphate dehydrogenase                                  | guaB  | 1.1.1.205 |
| RSDT_0987 | CDS | + | 1293520 | 1295064 | 1545 | 514 GMP synthase                                                            | guaA  | 6.3.5.2   |
| RSDT_0988 | CDS | + | 1295071 | 1295385 | 315  | 104 Sec-independent protein translocase protein TatB                        | tatB  |           |
| RSDT_0989 | CDS | + | 1295382 | 1296473 | 1092 | 363 Sec-independent protein translocase protein TatC                        | tatC  |           |
| RSDT_0990 | CDS | + | 1296515 | 1297114 | 600  | 199 imidazoleglycerol-phosphate dehydratase                                 | hisB  | 4.2.1.19  |
| RSDT_0991 | CDS | + | 1297114 | 1297767 | 654  | 217 conserved hypothetical protein                                          |       |           |
| RSDT_0992 | CDS | + | 1297764 | 1298582 | 819  | 272 phosphoribosylformimino-5-aminoimidazole carboxamide ribotide isomerase | hisA  | 5.3.1.16  |

|              |            |   |         |         |      |     |                                                                                                                            |       |                       |
|--------------|------------|---|---------|---------|------|-----|----------------------------------------------------------------------------------------------------------------------------|-------|-----------------------|
| RSDT_0993    | CDS        | - | 1299888 | 1298686 | 1203 | 400 | bifunctional 2-C-methyl-D-erythritol 4-phosphate cytidyltransferase/ 2-C-methyl-D-erythritol 2,4-cyclodiphosphate synthase | ispDF | 2.7.7.60/<br>4.6.1.12 |
| RSDT_RNA_1   | RNA        | - | 1300342 | 1299978 | 365  | x   | ribonuclease P RNA component                                                                                               | rnpB  |                       |
| RSDT_0994    | CDS        | - | 1301136 | 1300357 | 780  | 259 | conserved hypothetical protein                                                                                             |       |                       |
| RSDT_0995    | CDS        | - | 1301947 | 1301153 | 795  | 264 | conserved hypothetical protein                                                                                             |       |                       |
| RSDT_0996    | CDS        | - | 1302811 | 1302002 | 810  | 269 | phosphoribosylformylglycinamidase synthase glutamine amidotransferase subunit                                              | purQ  | 6.3.5.3               |
| RSDT_0997    | CDS        | + | 1303241 | 1304881 | 1641 | 546 | CTP synthetase                                                                                                             | pyrG  | 6.3.4.2               |
| RSDT_tRNA_47 | tRNA       | + | 1305079 | 1305154 | 76   | xx  | tRNA-Thr                                                                                                                   |       |                       |
| RSDT_pg_165  | pseudogene | - | 1305748 | 1305523 | 226  | x   | pseudogene of integrase                                                                                                    |       |                       |
| RSDT_0998    | CDS        | + | 1305950 | 1307752 | 1803 | 600 | elongation factor 4                                                                                                        | lepA  |                       |
| RSDT_RNA_2   | RNA        | - | 1308134 | 1308057 | 78   | x   | signal recognition particle RNA component                                                                                  | ffs   |                       |
| RSDT_pg_166  | pseudogene | - | 1308668 | 1308250 | 419  | x   | pseudogene of phage-related protein                                                                                        |       |                       |
| RSDT_pg_167  | pseudogene | + | 1308592 | 1308983 | 392  | x   | pseudogene of transposase                                                                                                  |       |                       |
| RSDT_0999    | CDS        | + | 1309013 | 1309930 | 918  | 305 | branched-chain amino acid ABC transporter permease LivH                                                                    | livH  |                       |
| RSDT_1000    | CDS        | + | 1309943 | 1311019 | 1077 | 358 | branched-chain amino acid ABC transporter permease LivM                                                                    | livM  |                       |
| RSDT_1001    | CDS        | + | 1311040 | 1311807 | 768  | 255 | branched-chain amino acid ABC transporter ATP-binding protein LivG                                                         | livG  |                       |
| RSDT_1002    | CDS        | + | 1311807 | 1312526 | 720  | 239 | branched-chain amino acid ABC transporter ATP-binding protein LivF                                                         | livF  |                       |
| RSDT_1003    | CDS        | + | 1312806 | 1313276 | 471  | 156 | phosphatidylglycerophosphatase A                                                                                           | pgpA  | 3.1.3.27              |
| RSDT_1004    | CDS        | - | 1313551 | 1313333 | 219  | 72  | translation initiation factor IF-1                                                                                         | infA  |                       |
| RSDT_pg_168  | pseudogene | + | 1313713 | 1313992 | 280  | x   | pseudogene of transposase                                                                                                  |       |                       |
| RSDT_1005    | CDS        | + | 1314145 | 1316994 | 2850 | 949 | isoleucyl-tRNA synthetase                                                                                                  | ileS  | 6.1.1.5               |
| RSDT_1006    | CDS        | + | 1316978 | 1317484 | 507  | 168 | signal peptidase II (lipoprotein signal peptidase)                                                                         | lspA  | 3.4.23.36             |
| RSDT_1007    | CDS        | + | 1317481 | 1317657 | 177  | 58  | conserved hypothetical protein                                                                                             |       |                       |
| RSDT_1008    | CDS        | + | 1317686 | 1318591 | 906  | 301 | conserved hypothetical protein                                                                                             |       |                       |
| RSDT_1009    | CDS        | - | 1320123 | 1318915 | 1209 | 402 | A/G-specific adenine glycosylase                                                                                           | mutY  | 3.2.2.-               |
| RSDT_1010    | CDS        | + | 1320246 | 1320755 | 510  | 169 | peptidyl-prolyl cis-trans isomerase B (cyclophilin B)                                                                      | ppiB  | 5.2.1.8               |

|              |            |   |         |         |      |      |                                                                             |       |          |
|--------------|------------|---|---------|---------|------|------|-----------------------------------------------------------------------------|-------|----------|
| RSDT_1011    | CDS        | - | 1322218 | 1321007 | 1212 | 403  | acetate kinase                                                              | ackA  | 2.7.2.1  |
| RSDT_1012    | CDS        | - | 1324388 | 1322280 | 2109 | 702  | phosphate acetyltransferase                                                 | pta   | 2.3.1.8  |
| RSDT_1013    | CDS        | - | 1327995 | 1324465 | 3531 | 1176 | pyruvate flavodoxin oxidoreductase                                          | nifJ  | 1.2.7.-  |
| RSDT_1014    | CDS        | + | 1328437 | 1329363 | 927  | 308  | fructose-1,6-bisphosphate aldolase                                          | fbaA  | 4.1.2.13 |
| RSDT_1015    | CDS        | + | 1329509 | 1331611 | 2103 | 700  | anaerobic ribonucleoside-triphosphate reductase                             | nrdD  | 1.17.4.2 |
| RSDT_1016    | CDS        | + | 1331647 | 1332336 | 690  | 229  | anaerobic ribonucleoside-triphosphate reductase activating protein          |       |          |
| RSDT_pg_169  | pseudogene | - | 1333138 | 1332373 | 766  | x    | pseudogene of conserved hypothetical protein                                |       |          |
| RSDT_1017    | CDS        | - | 1333918 | 1333142 | 777  | 258  | sirohydrochlorin cobaltochelataze                                           | cbiKc | 4.99.1.3 |
| RSDT_tRNA_48 | tRNA       | + | 1334013 | 1334089 | 77   | xx   | tRNA-Arg                                                                    |       |          |
| RSDT_pg_170  | pseudogene | + | 1335081 | 1335359 | 279  | x    | pseudogene of DNA restriction-modification system methyltransferase subunit |       |          |
| RSDT_pg_171  | pseudogene | + | 1335359 | 1336045 | 687  | x    | pseudogene of DNA restriction-modification system endonuclease subunit      |       |          |
| RSDT_1018    | CDS        | + | 1336784 | 1337206 | 423  | 140  | conserved hypothetical protein                                              |       |          |
| RSDT_1019    | CDS        | - | 1338394 | 1337342 | 1053 | 350  | phosphoribosyl-aminoimidazole synthetase                                    | purM  | 6.3.3.1  |
| RSDT_1020    | CDS        | + | 1338734 | 1339237 | 504  | 167  | cob(I)alamin adenosyltransferase                                            | cobA  | 2.5.1.17 |
| RSDT_pg_172  | pseudogene | + | 1339243 | 1339752 | 510  | x    | pseudogene of conserved hypothetical protein                                |       |          |
| RSDT_1021    | CDS        | - | 1340302 | 1339754 | 549  | 182  | uncharacterized BON-domain containing protein                               |       |          |
| RSDT_1022    | CDS        | - | 1341558 | 1340308 | 1251 | 416  | UDP-N-acetylglucosamine 1-carboxyvinyltransferase                           | murA  | 2.5.1.7  |
| RSDT_tRNA_49 | tRNA       | + | 1341706 | 1341781 | 76   | xx   | tRNA-His                                                                    |       |          |
| RSDT_1023    | CDS        | + | 1342570 | 1342899 | 330  | 109  | conserved hypothetical protein                                              |       |          |
| RSDT_1024    | CDS        | + | 1342963 | 1344261 | 1299 | 432  | adenylosuccinate synthetase                                                 | purA  | 6.3.4.4  |
| RSDT_1025    | CDS        | + | 1344254 | 1345237 | 984  | 327  | DNA polymerase III subunit delta'                                           | holB  | 2.7.7.7  |
| RSDT_1026    | CDS        | - | 1345665 | 1345153 | 513  | 170  | conserved hypothetical protein                                              |       |          |
| RSDT_1027    | CDS        | - | 1347116 | 1345719 | 1398 | 465  | undecaprenyl-phosphate galactose phosphotransferase                         | wbaP  | 2.7.8.6  |
| RSDT_1028    | CDS        | - | 1348466 | 1347243 | 1224 | 407  | conserved hypothetical protein                                              |       |          |
| RSDT_1029    | CDS        | - | 1349989 | 1348496 | 1494 | 497  | membrane bound O-acyl transferase MBOAT family protein                      |       |          |
| RSDT_1030    | CDS        | - | 1350417 | 1350130 | 288  | 95   | integration host factor A                                                   | ihfA  |          |



|             |            |   |         |         |      |     |                                                                                  |      |           |
|-------------|------------|---|---------|---------|------|-----|----------------------------------------------------------------------------------|------|-----------|
| RSDT_1031   | CDS        | + | 1350603 | 1351613 | 1011 | 336 | radical SAM domain-containing protein                                            |      |           |
| RSDT_pg_173 | pseudogene | - | 1352072 | 1351757 | 316  | x   | pseudogene of conserved hypothetical protein                                     |      |           |
| RSDT_1032   | CDS        | - | 1352899 | 1352120 | 780  | 259 | acetylglutamate kinase                                                           | argB | 2.7.2.8   |
| RSDT_1033   | CDS        | + | 1353251 | 1354639 | 1389 | 462 | glutamyl-tRNA synthetase                                                         | gltX | 6.1.1.17  |
| RSDT_1034   | CDS        | - | 1355803 | 1355126 | 678  | 225 | conserved hypothetical protein                                                   |      |           |
| RSDT_pg_174 | pseudogene | - | 1356046 | 1355818 | 229  | x   | pseudogene of putative tRNA methyltransferase                                    |      |           |
| RSDT_1035   | CDS        | - | 1357453 | 1356407 | 1047 | 348 | aspartate-semialdehyde dehydrogenase                                             | asd  | 1.2.1.11  |
| RSDT_1036   | CDS        | - | 1358926 | 1357562 | 1365 | 454 | asparaginyl-tRNA synthetase                                                      | asnC | 6.1.1.22  |
| RSDT_1037   | CDS        | - | 1359609 | 1359151 | 459  | 152 | 3-hydroxyacyl-[acyl-carrier-protein] dehydratase                                 | fabZ | 4.2.1.59  |
| RSDT_1038   | CDS        | - | 1360245 | 1359685 | 561  | 186 | outer membrane chaperone Skp                                                     | skp  |           |
| RSDT_pg_175 | pseudogene | + | 1360403 | 1360928 | 526  | x   | pseudogene of D-alanyl-D-alanine dipeptidase                                     | vanX | 3.4.13.22 |
| RSDT_1039   | CDS        | - | 1361937 | 1361026 | 912  | 303 | D-alanine-D-alanine ligase                                                       | ddl  | 6.3.2.4   |
| RSDT_1040   | CDS        | - | 1362583 | 1361894 | 690  | 229 | uncharacterized metal dependent phosphohydrolase                                 |      |           |
| RSDT_pg_176 | pseudogene | - | 1363122 | 1362817 | 306  | x   | pseudogene of type III restriction-modification system methyltransferase subunit |      |           |
| RSDT_1041   | CDS        | + | 1363660 | 1364127 | 468  | 155 | ammonia-forming cytochrome c nitrite reductase small subunit                     | nrfH | 1.7.2.2   |
| RSDT_1042   | CDS        | + | 1364120 | 1365700 | 1581 | 526 | ammonia-forming cytochrome c nitrite reductase large subunit                     | nrfA | 1.7.2.2   |
| RSDT_1043   | CDS        | - | 1366396 | 1365779 | 618  | 205 | uncharacterized selenium metabolism protein YedF                                 | yedF |           |
| RSDT_pg_177 | pseudogene | - | 1366696 | 1366446 | 251  | x   | pseudogene of lesion-bypass DNA polymerase V subunit UmuD                        | umuD | 3.4.21.-  |
| RSDT_pg_178 | pseudogene | + | 1366907 | 1367074 | 168  | x   | pseudogene of glyceraldehyde-3-phosphate dehydrogenase                           | gap2 | 1.2.1.12  |
| RSDT_pg_179 | pseudogene | + | 1367453 | 1367669 | 217  | x   | pseudogene of transposase                                                        |      |           |
| RSDT_1044   | CDS        | + | 1367728 | 1368012 | 285  | 94  | conserved hypothetical protein                                                   |      |           |
| RSDT_1045   | CDS        | - | 1369519 | 1368089 | 1431 | 476 | ArsB/NhaD family permease                                                        |      |           |
| RSDT_1046   | CDS        | + | 1369671 | 1370276 | 606  | 201 | tRNA (guanosine-2'-O-)-methyltransferase                                         | trmH | 2.1.1.34  |
| RSDT_1047   | CDS        | + | 1370475 | 1372016 | 1542 | 513 | RfbX-like uncharacterized exporter involved in cell wall biogenesis              |      |           |
| RSDT_pg_180 | pseudogene | + | 1372067 | 1372382 | 316  | x   | pseudogene of conserved hypothetical protein                                     |      |           |
| RSDT_1048   | CDS        | - | 1372877 | 1372404 | 474  | 157 | alternative heme biosynthesis protein AhbB                                       | ahbB |           |
| RSDT_pg_181 | pseudogene | - | 1373427 | 1372971 | 457  | x   | pseudogene of conserved hypothetical protein                                     |      |           |

|             |            |   |         |         |       |                                                       |      |          |
|-------------|------------|---|---------|---------|-------|-------------------------------------------------------|------|----------|
| RSDT_1049   | CDS        | - | 1373854 | 1373588 | 267   | 88 uncharacterized RNA-binding protein                |      |          |
| RSDT_1050   | CDS        | - | 1375389 | 1374022 | 1368  | 455 replicative DNA helicase                          | dnaB | 3.6.4.12 |
| RSDT_1051   | CDS        | - | 1375970 | 1375446 | 525   | 174 50S ribosomal protein L9                          | rplI |          |
| RSDT_1052   | CDS        | - | 1376247 | 1375984 | 264   | 87 30S ribosomal protein S18                          | rpsR |          |
| RSDT_1053   | CDS        | - | 1376557 | 1376249 | 309   | 102 30S ribosomal protein S6                          | rpsF |          |
| RSDT_pg_182 | pseudogene | - | 1377884 | 1377197 | 688 x | pseudogene of putative glycerate dehydrogenase        | hprA | 1.1.1.29 |
| RSDT_1054   | CDS        | - | 1378485 | 1378021 | 465   | 154 peptidoglycan-associated lipoprotein Pal          | pal  |          |
| RSDT_1055   | CDS        | - | 1380069 | 1378765 | 1305  | 434 Tol-Pal system periplasmic component TolB         | tolB |          |
| RSDT_1056   | CDS        | - | 1381318 | 1380407 | 912   | 303 Tol-Pal system inner membrane component TolA      | tolA |          |
| RSDT_1057   | CDS        | - | 1381768 | 1381325 | 444   | 147 Tol-Pal system inner membrane component TolR      | tolR |          |
| RSDT_1058   | CDS        | - | 1382465 | 1381773 | 693   | 230 Tol-Pal system inner membrane component TolQ      | tolQ |          |
| RSDT_1059   | CDS        | - | 1383515 | 1382670 | 846   | 281 protein HflC                                      | hflC |          |
| RSDT_1060   | CDS        | - | 1384681 | 1383515 | 1167  | 388 protein HflK                                      | hflK |          |
| RSDT_1061   | CDS        | - | 1386179 | 1385403 | 777   | 258 thiazole synthase                                 | thiG | 2.8.1.10 |
| RSDT_1062   | CDS        | - | 1386382 | 1386182 | 201   | 66 sulfur carrier protein ThiS                        | thiS |          |
| RSDT_pg_183 | pseudogene | + | 1386447 | 1386620 | 174 x | pseudogene of transposase                             |      |          |
| RSDT_pg_184 | pseudogene | + | 1386715 | 1387111 | 397 x | pseudogene of TonB system biopolymer transporter ExbD | exbD |          |
| RSDT_1063   | CDS        | - | 1388598 | 1387462 | 1137  | 378 queuine tRNA-ribosyltransferase                   | tgt  | 2.4.2.29 |
| RSDT_1064   | CDS        | + | 1388705 | 1389835 | 1131  | 376 alanine racemase                                  | alr  | 5.1.1.1  |
| RSDT_1065   | CDS        | + | 1389972 | 1390181 | 210   | 69 Sec-independent protein translocase protein TatA   | tatA |          |
| RSDT_pg_185 | pseudogene | + | 1390333 | 1390764 | 432 x | pseudogene of amino acid-binding ACT domain protein   |      |          |
| RSDT_1066   | CDS        | + | 1390988 | 1391275 | 288   | 95 chaperonin GroES                                   | groS |          |
| RSDT_1067   | CDS        | + | 1391318 | 1392958 | 1641  | 546 chaperonin GroEL                                  | groL |          |
| RSDT_1068   | CDS        | - | 1394151 | 1393141 | 1011  | 336 thiamine-monophosphate kinase                     | thiL | 2.7.4.16 |
| RSDT_1069   | CDS        | - | 1396303 | 1394153 | 2151  | 716 DNA helicase II UvrD                              | uvrD | 3.6.4.12 |
| RSDT_1070   | CDS        | - | 1396619 | 1396365 | 255   | 84 [NiFe] hydrogenase maturation protein HypC         | hypC |          |
| RSDT_1071   | CDS        | - | 1397648 | 1396641 | 1008  | 335 [NiFe] hydrogenase maturation protein HypE        | hypE |          |

|             |            |   |         |         |       |                                                               |                |
|-------------|------------|---|---------|---------|-------|---------------------------------------------------------------|----------------|
| RSDT_1072   | CDS        | - | 1398751 | 1397648 | 1104  | 367 [NiFe] hydrogenase maturation protein HypD                | hypD           |
| RSDT_1073   | CDS        | - | 1399788 | 1398766 | 1023  | 340 UDP-N-acetylglucosamine 4-epimerase                       | wbpP 5.1.3.7   |
| RSDT_1074   | CDS        | - | 1400737 | 1399931 | 807   | 268 tRNA threonylcarbamoyladenosine biosynthesis protein TsaB | tsaB           |
| RSDT_1075   | CDS        | - | 1401867 | 1400746 | 1122  | 373 putative membrane-associated zinc metalloprotease         |                |
| RSDT_1076   | CDS        | - | 1403177 | 1401864 | 1314  | 437 1-deoxy-D-xylulose 5-phosphate reductoisomerase           | dxr 1.1.1.267  |
| RSDT_1077   | CDS        | - | 1404017 | 1403199 | 819   | 272 phosphatidate cytidyltransferase                          | cdsA 2.7.7.41  |
| RSDT_1078   | CDS        | - | 1404758 | 1404048 | 711   | 236 undecaprenyl diphosphate synthase                         | uppS 2.5.1.31  |
| RSDT_pg_186 | pseudogene | - | 1405076 | 1404851 | 226 x | pseudogene of transposase                                     |                |
| RSDT_1079   | CDS        | - | 1406302 | 1405259 | 1044  | 347 putative molybdoprotein maturation protien                |                |
| RSDT_pg_187 | pseudogene | + | 1406542 | 1406940 | 399 x | pseudogene of uncharacterized glycosyl transferase            |                |
| RSDT_1080   | CDS        | - | 1407517 | 1406999 | 519   | 172 Holliday junction resolvase RuvC                          | ruvC 3.1.22.4  |
| RSDT_1081   | CDS        | - | 1408305 | 1407568 | 738   | 245 uncharacterized transcriptional regulator                 |                |
| RSDT_1082   | CDS        | - | 1408928 | 1408329 | 600   | 199 23S rRNA Um2552 methyltransferase                         | rlmE 2.1.1.166 |
| RSDT_pg_188 | pseudogene | - | 1409348 | 1409012 | 337 x | pseudogene of transposase                                     |                |
