# Supplementary material for: Genome of ‘Ca. Desulfovibrio trichonymphae', an H2-oxidizing bacterium in a tripartite symbiotic system within a protist cell in the termite gut
Source: PubMed Central journal article supplement — ISME J. 2016 Nov 1;11(3):766–76. doi: 10.1038/ismej.2016.143 (PMC5322295; doi:10.1038/ismej.2016.143), 2016-11-01
Supplement: ismej2016143x4.pdf [file ismej2016143x4.pdf]

**Supplementary Table S7. Genes with higher sequence identity with those of bacteria other than desulfovibrios.**

| gene ID   | gene function                                             | gene name of BLAST top hit                                                   | organism of BLAST top hit                           | sequence identity (%) | maximum identity to desulfovibrio sequences | codon adaptation index <sup>1</sup> | GC (%) <sup>2</sup> |
|-----------|-----------------------------------------------------------|------------------------------------------------------------------------------|-----------------------------------------------------|-----------------------|---------------------------------------------|-------------------------------------|---------------------|
| RSDT_0009 | YqeC-like putative molybdenum hydroxylase maturation      | WP_015838089.1  4-hydroxybenzoyl-CoA thioesterase                            | <i>Geobacter</i> sp. M21                            | 40                    | 30                                          | 0.729                               | 62.5                |
| RSDT_0013 | type II DNA restriction-modification system methylase     | WP_026767432.1  DNA methylase N-4                                            | <i>Selenomonas ruminantium</i>                      | 80                    | 28                                          | 0.642                               | 43.9                |
| RSDT_0044 | fumarate reductase subunit D                              | WP_029094287.1  fumarate reductase                                           | <i>Budvicia aquatica</i>                            | 47                    | -                                           | 0.682                               | 57.3                |
| RSDT_0045 | fumarate reductase subunit C                              | WP_049277929.1  fumarate reductase                                           | <i>Serratia marcescens</i>                          | 47                    | 32                                          | 0.662                               | 50.0                |
| RSDT_0046 | fumarate reductase subunit B                              | KOY60604.1  fumarate reductase                                               | <i>Photorhabdus heterorhabditis</i>                 | 68                    | 33                                          | 0.722                               | 53.9                |
| RSDT_0047 | fumarate reductase flavoprotein subunit A                 | WP_038222555.1  fumarate reductase                                           | <i>Xenorhabdus bovienii</i>                         | 72                    | 38                                          | 0.753                               | 57.4                |
| RSDT_0048 | conserved hypothetical protein                            | EFD25460.1  hypothetical protein                                             | <i>Anaerobaculum hydrogeniformans</i> ATCC BAA-1850 | 53                    | 29                                          | 0.741                               | 54.6                |
| RSDT_0052 | cation efflux system protein CusA                         | WP_029741280.1  cation transporter                                           | <i>Enterobacter asburiae</i>                        | 67                    | 46                                          | 0.726                               | 57.1                |
| RSDT_0053 | cation efflux system protein CusB                         | WP_024908524.1  copper resistance protein                                    | <i>Enterobacter asburiae</i>                        | 51                    | 26                                          | 0.734                               | 59.0                |
| RSDT_0054 | cation efflux system protein CusF                         | WP_035891064.1  hypothetical protein                                         | <i>Kluyvera ascorbata</i>                           | 42                    | 36                                          | 0.713                               | 54.6                |
| RSDT_0055 | cation efflux system protein CusC                         | WP_000074222.1  cation efflux system protein CusC                            | <i>Escherichia coli</i>                             | 46                    | 37                                          | 0.734                               | 59.2                |
| RSDT_0056 | hypothetical protein                                      | WP_034704395.1  hypothetical protein                                         | <i>Enterococcus gallinarum</i>                      | 27                    | -                                           | 0.742                               | 60.3                |
| RSDT_0058 | recombination protein RmuC                                | WP_035687958.1  hypothetical protein, partial                                | <i>Flavobacterium reichenbachii</i>                 | 58                    | 23                                          | 0.660                               | 36.6                |
| RSDT_0060 | cell division protein Fic                                 | WP_040196958.1  cell division protein Fic                                    | ' <i>Candidatus</i> Soleaferrea massiliensis'       | 70                    | 51                                          | 0.623                               | 43.4                |
| RSDT_0137 | type II DNA DNA restriction-modification system methylase | WP_035401565.1  restriction endonuclease subunit M                           | <i>Chlorobium</i> sp. GBChlB                        | 74                    | 28                                          | 0.616                               | 31.2                |
| RSDT_0154 | conserved hypothetical protein                            | EIC22791.1  hypothetical protein Thi970DRAFT_00426                           | <i>Thiorhodovibrio</i> sp. 970                      | 53                    | 23                                          | 0.699                               | 52.7                |
| RSDT_0236 | conserved hypothetical protein                            | GAP72491.1  hypothetical protein SAMD00024442_33_13                          | ' <i>Ca.</i> Symbiothrix dinenymphae'               | 67                    | 26                                          | 0.721                               | 48.0                |
| RSDT_0257 | tRNA-specific 2-thiouridylase MnmA                        | WP_021999269.1  tRNA (5-methylaminomethyl-2-thiouridylate)-methyltransferase | <i>Acetobacter</i> sp. CAG:977                      | 52                    | 37                                          | 0.711                               | 58.5                |

|           |                                                            |                                                                                |                                          |    |    |       |      |
|-----------|------------------------------------------------------------|--------------------------------------------------------------------------------|------------------------------------------|----|----|-------|------|
| RSDT_0258 | adenylyltransferase/sulfurtransferase MoeZ                 | WP_045673096.1  molybdenum cofactor biosynthesis protein MoeB                  | <i>Paenibacillus beijingensis</i>        | 58 | 49 | 0.728 | 56.5 |
| RSDT_0263 | CRISPR-associated protein Csx16                            | WP_038500039.1  CRISPR-associated protein                                      | <i>Basilea psittacipulmonis</i>          | 53 | 36 | 0.746 | 60.2 |
| RSDT_0391 | multiple promoter invertase                                | GAP16136.1  site-specific recombinases, DNA invertase Pin homologs             | <i>Longilinea arvoryzae</i>              | 77 | 39 | 0.650 | 41.6 |
| RSDT_0408 | putative Fe <sup>2+</sup> permease transmembrane component | WP_034943543.1  hypothetical protein                                           | <i>Gilliamella apicola</i>               | 55 | 49 | 0.680 | 52.7 |
| RSDT_0409 | putative Fe <sup>2+</sup> permease periplasmic component   | WP_039129983.1  hypothetical protein                                           | <i>Gilliamella apicola</i>               | 67 | 27 | 0.682 | 54.0 |
| RSDT_0410 | conserved membrane protein                                 | WP_015708650.1  membrane protein                                               | <i>Treponema primitia</i>                | 37 | 36 | 0.665 | 53.6 |
| RSDT_0411 | ABC efflux transporter permease                            | WP_042431140.1  ABC transporter permease                                       | <i>Clostridium</i> sp. JCD               | 61 | 27 | 0.699 | 54.7 |
| RSDT_0412 | ABC efflux transporter permease                            | WP_038666892.1  ABC transporter permease                                       | <i>Pelosinus</i> sp. UFO1                | 51 | 25 | 0.697 | 54.2 |
| RSDT_0413 | ABC efflux transporter ATP-binding protein                 | WP_009066059.1  GTPase                                                         | <i>Clostridium</i> sp. MSTE9             | 77 | 42 | 0.699 | 49.8 |
| RSDT_0542 | aspartate ammonia-lyase                                    | WP_015767470.1  aspartate ammonia-lyase                                        | ' <i>Ca. Accumulibacter phosphatis</i> ' | 73 | 57 | 0.732 | 49.8 |
| RSDT_0543 | anaerobic C4-dicarboxylate transporter DcuA                | WP_010864804.1  anaerobic c4-dicarboxylate membrane transporter family protein | <i>Plesiomonas</i> spp.                  | 73 | 36 | 0.686 | 54.5 |
| RSDT_0572 | Sell family tetratricopeptide repeat protein               | WP_008523308.1  hypothetical protein                                           | <i>Jonquetella anthropi</i>              | 41 | 33 | 0.705 | 56.5 |
| RSDT_0599 | uncharacterized transcriptional regulator                  | WP_022204637.1  hypothetical protein                                           | <i>Eubacterium</i> sp. CAG:248           | 53 | 39 | 0.517 | 41.8 |
| RSDT_0600 | HipA-like protein kinase                                   | WP_022459109.1  hypothetical protein                                           | <i>Fusobacterium</i> sp. CAG:439         | 57 | 29 | 0.648 | 45.9 |
| RSDT_0618 | methylated-DNA-[protein]-cysteine S-methyltransferase      | WP_022000033.1  methylated-DNA--protein-cysteine methyltransferase             | <i>Acetobacter</i> sp. CAG:977           | 58 | 43 | 0.722 | 59.7 |
| RSDT_0641 | conserved hypothetical protein                             | WP_029462313.1  2-hydroxyacid dehydrogenase                                    | Comamonadaceae bacterium H1              | 59 | 52 | 0.699 | 52.4 |
| RSDT_0673 | hypothetical protein                                       | WP_006336104.1  ferredoxin                                                     | <i>Gordonia rhizosphaera</i>             | 44 | 35 | 0.615 | 54.9 |
| RSDT_0708 | hypothetical protein                                       | XP_003344393.1  hypothetical protein SMAC_08986                                | <i>Sordaria macrospora</i> k-hell        | 30 | 28 | 0.652 | 58.3 |
| RSDT_0726 | MerR family transcriptional regulator                      | WP_049817209.1  hypothetical protein                                           | beta proteobacterium SCGC AAA027-I06     | 56 | 26 | 0.623 | 48.8 |
| RSDT_0732 | selenium-dependent molybdenum hydroxylase accessory        | CBX28760.1  hypothetical protein N47_L13580                                    | uncultured <i>Desulfobacterium</i> sp.   | 53 | 33 | 0.675 | 58.5 |

|           |                                                                         |                                                                                |                                                   |    |    |       |      |
|-----------|-------------------------------------------------------------------------|--------------------------------------------------------------------------------|---------------------------------------------------|----|----|-------|------|
| RSDT_0735 | putative selenate reductase                                             | WP_022849647.1  pyridine nucleotide-disulfide oxidoreductase                   | <i>Geovibrio</i> sp. L21-Ace-BES                  | 50 | 29 | 0.699 | 53.3 |
| RSDT_0737 | phenylhydantoinase/dihydropyrimidinase-like protein YgeZ                | WP_023976435.1  phenylhydantoinase                                             | <i>Clostridium pasteurianum</i>                   | 51 | 35 | 0.698 | 54.8 |
| RSDT_0784 | heavy metal-resistance transcriptional regulator                        | WP_037588650.1  ArsR family transcriptional regulator                          | <i>Stenoxybacter acetivorans</i>                  | 80 | 50 | 0.724 | 51.4 |
| RSDT_0816 | O-acetylhomoserine/O-acetylserine sulfhydrylase                         | WP_010075485.1  O-acetylhomoserine aminocarboxypropyltransferase               | <i>Clostridium cellulovorans</i>                  | 76 | 69 | 0.725 | 53.9 |
| RSDT_0831 | aromatic amino acid permease AroP                                       | WP_015423019.1  aromatic amino acid transporter                                | ' <i>Ca. Endomicrobium trichonymphae</i> ' Rs-D17 | 63 | 52 | 0.660 | 51.7 |
| RSDT_0866 | H <sup>+</sup> -translocating [NiFe] hydrogenase complex, transmembrane | BAL59209.1  hydrogenase-4 component B                                          | ' <i>Ca. Acetothermus autotrophicum</i> '         | 39 | 38 | 0.702 | 58.8 |
| RSDT_0923 | putative transmembrane phospholipid methyltransferase                   | KPK25183.1  hypothetical protein AMJ61_12665                                   | Desulfobacterales bacterium SG8_35_2              | 48 | 29 | 0.646 | 46.7 |
| RSDT_0924 | glutamin-(asparagin-)ase                                                | WP_007874054.1  glutaminase                                                    | <i>Polaromonas</i> sp. CF318                      | 64 | 38 | 0.634 | 47.3 |
| RSDT_1015 | anaerobic ribonucleoside-triphosphate reductase                         | WP_027360376.1  ribonucleoside-triphosphate reductase                          | <i>Desulforegula conservatrix</i>                 | 69 | 51 | 0.734 | 51.3 |
| RSDT_1016 | anaerobic ribonucleoside-triphosphate reductase activating              | KPJ79030.1  anaerobic ribonucleoside-triphosphate reductase activating protein | Deltaproteobacteria bacterium SG8_13              | 45 | 42 | 0.687 | 52.5 |
| RSDT_1079 | putative molybdoprotein maturation protien                              | WP_032076464.1  xanthine dehydrogenase                                         | <i>Clostridium drakei</i>                         | 43 | 40 | 0.709 | 53.6 |

<sup>1</sup> Average CAI value of all CDSs was  $0.72 \pm 0.036$ . The confidence interval for 95% is 0.650-0.789.

<sup>2</sup> Average GC % of all CDSs was  $55.93 \pm 4.29$ . The confidence interval for 95% is 47.87-64.67.
